# Supplementary material for: CHANGES IN LIFE EXPECTANCY BETWEEN 2019 AND 2021 IN THE UNITED STATES AND 21 PEER COUNTRIES
Source: bioRxiv or medRxiv preprint supplement (doi:10.1101/2022.04.05.22273393), 2022-06-01
Supplement: Supplementary file [file media-1.pdf]

**CHANGES IN LIFE EXPECTANCY BETWEEN 2019 AND 2021:  
UNITED STATES AND 19 PEER COUNTRIES**

Ryan K. Masters, PhD<sup>1</sup>, Laudan Y. Aron, MA<sup>2</sup>, Steven H. Woolf, MD, MPH<sup>3</sup>

**Supplementary Material on Methods**

---

1. Data source for counts of death among U.S. populations, 2018-2020 and 2021
2. Data source for U.S. population estimates, 2018-2021
3. Data source for official U.S. life tables, 2018
4. Calculation of life tables for U.S. populations, 2019-2021
5. Data sources for counts of death among other high-income countries, 2018-2020 and 2021
6. Data sources for peer country population estimates, 2018-2021
7. Data sources for life tables for peer country populations, 2018, 2019, and/or 2020
8. Calculation of life tables for peer country populations, 2019, 2020, and/or 2021
9. Validation of estimates of U.S. and peer country life expectancy, 2019 and 2020
10. Simulation of 2021 life tables and life expectancy estimates
11. Figures for female life expectancy and male life expectancy changes, 2019-2020 and 2020-2021.
12. Examples of analytic scripts in Stata and Python for merging data, simulating life tables, and estimating median values and credible ranges of 2021 life expectancy estimates.

---

<sup>1</sup> Department of Sociology, University of Colorado Boulder, Boulder, CO

<sup>2</sup> Health Policy Center, Urban Institute, Washington, DC

<sup>3</sup> Center on Society and Health, Virginia Commonwealth University, Richmond, VA

Correspondence: Steven H. Woolf, MD, MPH, Center on Society and Health, Virginia Commonwealth University School of Medicine, 830 East Main Street, Suite 5035, Richmond, Virginia 23298-0212.

Email: [steven.woolf@vcuhealth.org](mailto:steven.woolf@vcuhealth.org)

Below, we describe the data sources and methods used to estimate 2021 life expectancy among U.S. populations and populations in other high-income countries. We use common notations for life table calculations. For example, the number of deaths occurring in an age interval  $x + n$  is commonly indicated by  ${}_n d_x$ , where  $x$  is the beginning of the age interval and  $n$  is the width of the age interval (e.g.,  $n=1$  for age interval 0-1,  $n=4$  for age interval 1-4, and  $n=5$  for five-year age intervals 5-9, ..., 95-99). The  $n$  is often omitted from the notation such that deaths occurring in age interval  $x+n$  are simply represented as  $d_x$ . Below, we **bold** notations to indicate values obtained from an official source (e.g., National Center for Health Statistics for U.S. values) or a reported source (e.g., Human Mortality Database for values among other high-income countries). Notations that are not bolded indicate a value obtained from provisional sources and/or a value that we estimated using our methods. For example:

|                                                                       |                             |
|-----------------------------------------------------------------------|-----------------------------|
| Official counts of death in age $x$ in year $t$ :                     | <b><math>d_{x_t}</math></b> |
| Provisional counts of death in age $x$ in year $t$ :                  | $d_{x_t}$                   |
| Official estimates of mid-year population in age $x$ in year $t$ :    | <b><math>L_{x_t}</math></b> |
| Provisional estimates of mid-year population in age $x$ in year $t$ : | $L_{x_t}$                   |
| Official estimates of death rate in age $x$ in year $t$ :             | <b><math>m_{x_t}</math></b> |
| Provisional estimates of death rate in age $x$ in year $t$ :          | $m_{x_t}$                   |

### 1. Data source for counts of death among U.S. populations, 2018-2020 and 2021

Official counts of death among U.S. populations in 2018, 2019, and 2020 ( **$d_{x_t}$** ) were obtained from the National Center for Health Statistics' (NCHS) Restricted-Use Vital Statistics Data.<sup>1</sup> Provisional counts of death among U.S. populations in 2021 ( $d_{x_{2021}}$ ) were obtained from the April 13, 2022 data release of the NCHS provisional mortality file, [AH Excess Deaths by Sex, Age, and Race](#).<sup>2</sup>

### 2. Data source for U.S. population estimates, 2018-2021

Mid-year population estimates in 2018, 2019, and 2020 ( **$L_{x_t}$** ) by age, sex, and race/ethnicity were obtained from the U.S. Census Bureau file, [Vintage 2020 Bridged-Race Population Estimates](#).<sup>3</sup> July 1 population counts for each year in 2018-2020 were summed at ages 0-1, 1-4, 5-9, ..., 80-84, 85+ and for 2021 were summed at ages 0-14, 15-19, ..., 80-84, 85+ to match the age structure of death counts reported in provisional NCHS data. U.S. population counts on July 1, 2021 ( $L_{x_{2021}}$ ) were estimated from the linear trends of age-specific mid-year populations between years 2017 and 2020.

### 3. Data source for official U.S. life tables, 2018

United States life tables for 2018 were obtained from [Arias and Xu \(2020\)](#).<sup>4</sup>

### 4. Calculation of life tables for U.S. populations, 2019-2021

The  $m_{x_t}$  for U.S. male and female populations was calculated by merging official counts of death by age ( **$d_{x_t}$** ) for 19 age groups (0-1, 1-4, 5-9, ..., 80-84, 85+) with mid-year population counts by age ( **$L_{x_t}$** )<sup>2</sup>. We also estimated  $m_{x_{2021}}$  by merging provisional death counts by age for 14 age groups (0-14, 15-19, ..., 80-

84, 85+),  $d_{x_{2021}}$ , with  $L_{x_{2021}}$  estimates. Using  $m_{x_t}$ , we estimated the 2021:2018, 2020:2018, and 2019:2018 age-specific mortality rate ratios ( $RR_{2021}$ ,  $RR_{2020}$ ,  $RR_{2019}$ ). To estimate official  $m_{x_{2019}}$ ,  $m_{x_{2020}}$ , and  $m_{x_{2021}}$  used to generate 2019, 2020, and 2021 U.S. life tables, we combined age-specific  $RR_{2019}$ ,  $RR_{2020}$ , and  $RR_{2021}$  with  $m_{x_{2018}}$  in the official 2018 US life tables, as follows:<sup>4</sup>

$$m_{x_{2019}} = m_{x_{2018}} * RR_{2019} \quad m_{x_{2020}} = m_{x_{2018}} * RR_{2020} \quad m_{x_{2021}} = m_{x_{2018}} * RR_{2021}$$

To generate 2019, 2020, and 2021 U.S. life tables, we used  $m_{x_{2019}}$ ,  $m_{x_{2020}}$ , and  $m_{x_{2021}}$  and  $a_{x_{2018}}$  (i.e., average time lived by the deceased in age interval  $x$ ) obtained from the official 2018 life table to estimate  $q_{x_{2019}}$ ,  $q_{x_{2020}}$ , and  $q_{x_{2021}}$  (i.e., probability of death at age  $x$ ). For example, for the 2021 life table:

$$q_{x_{2021}} = \frac{(m_{x_{2021}} * n)}{(1 + [(n - a_{x_{2018}}) * m_{x_{2021}}])} \quad \text{where } n \text{ is the width of the age interval.}$$

## 5. Data sources for counts of death among other high-income countries, 2018-2021

Death counts in 2018, 2019, 2020, and 2021 by sex and by age in each peer country were obtained from the April 25, 2022 release of the Human Mortality Database (HMD) - Short-term Mortality Fluctuations [original input data in standardized format](#) files.<sup>5</sup> The age-specificity of death counts varied across peer countries. For example, death counts in England and Wales (combined) for some years were provided across seven age groups of varying intervals (0-1, 1-14 15-44, 45-64, 65-74, 75-84, 85+) while death counts in Norway for all years were provided across 21 five-year age intervals (0-4, 5-9, ..., 95-99, 100+). See the HMD [metadata](#) for additional details about each peer country's reports of 2020 and 2021 deaths.

## 6. Data sources for peer country population estimates, 2018-2021

Population counts in 2018, 2019, 2020, and/or 2021 by sex and age were obtained from each country's central statistical agency:

[Austria](#)

[Belgium](#)

[Denmark](#)

[Finland](#)

[France](#)

[Germany](#)

[Israel](#)

[Italy](#)

[Netherlands](#)

[Norway](#)

[Portugal](#)

[Spain](#)

[Sweden](#)

[Switzerland](#)

[UK - England and Wales](#)

[UK - Northern Ireland](#)

[UK - Scotland](#)

Death counts for New Zealand and South Korea were reported for wider age groups than the age groups published by the HMD-STMF (i.e., 0-14, 15-64, 65-74, 75-84, 85+), and therefore the HMD-STMF was used as the source for South Korea's and New Zealand's year-specific mortality rates,  $m_{x_{2021}}$ . Because we use  $m_{x_{2021}}$  from HMD-STMF, population estimates were not obtained for these two countries.

## 7. Data sources for life tables for peer country populations, 2018, 2019, and/or 2020

Life expectancy in 2019 and 2020 for Belgium, Denmark, Finland, Norway, Portugal, Spain, Sweden, and Switzerland were obtained from the HMD, as was life expectancy in 2019 for Austria and Netherlands.<sup>6</sup> Life tables for [Germany](#), [Israel](#), [South Korea](#), and [New Zealand](#) were obtained from their central statistical agencies because they were not available for 2019 or 2020 in the HMD.

## 8. Calculation of life tables for peer country populations, 2019, 2020, and/or 2021

For life expectancies not provided in the HMD or not provided by each country's statistical agency, we generated 2019, 2020, and/or 2021 life tables in four steps. First, we estimated age-specific death rates ( $m_{x_t}$ ) for each country's male and female population in years 2018, 2019, 2020, and 2021 using the HMD-STMF [original input data in standardized format](#) files (numerator) and age-specific mid-year population estimates (denominator) provided by each country's central statistical agency. Second, we estimated the 2021:2020, 2021:2019, or 2021:2018 age-specific mortality rate ratios ( $RR_{2021,STMF}$ ) for each country's total, male, and female populations using the estimated  $m_{x_t}$ . If needed, we also estimated the 2020:2019 or 2020:2018 and 2019:2018 rate ratios. Third, to estimate  $m_{x_{2021}}$  for the 22 age groups used to generate 2021 life tables for most countries, we multiplied the age-specific  $RR_{2021,STMF}$  by the age-specific 2018, 2019, and/or 2020  $m_{x_t}$  reported in each country's HMD life table, as follows:

$$m_{x_{2021}} = m_{x_t} * RR_{2021,STMF}$$

where  $t$  is the most recently available life table and  $x = 0-1, 1-4, 5-9, \dots, 100-104, 105-109, 110+$

For Germany, South Korea, and New Zealand,  $m_{x_{2021}}$  was estimated as:

$$m_{x_{2021}} = m_{x_t} * RR_{2021,STMF}$$

where  $t$  is the most recently available life table and  $x = 0-1, 1-4, 5-9, \dots, 90-94, 95-99, 100+$

This same step was used to estimate  $m_{x_{2019}}$  and  $m_{x_{2020}}$  for peer countries for which 2019 life tables (e.g., France) or 2020 life tables (e.g., Austria) were not available in either the HMD or direct sources.

Fourth, to generate 2021 life tables for peer countries, we used  $m_{x_{2021}}$  and each country's  $a_{x_t}$  (i.e., average time lived by the deceased in age interval  $x$ ) from the most recently available life table to estimate  $q_{x_{2021}}$  (i.e., probability of death at age  $x$ ). For example, for 2021 in Denmark:

$$q_{x_{2021}} = \frac{(m_{x_{2021}} * n)}{(1 + [(n - a_{x_{2020}}) * m_{x_{2021}}])} \quad \text{where } n \text{ is the width of the age interval.}$$

Where needed, we also generated 2019 and 2020 life tables for peer countries using  $m_{x_{2019}}$  or  $m_{x_{2020}}$  and each country's  $a_{x_t}$  from the most recently available life table to estimate  $q_{x_{2021}}$ . For example, for 2020 in Austria:

$$q_{x_{2020}} = \frac{(m_{x_{2020}} * n)}{(1 + [(n - a_{x_{2019}}) * m_{x_{2020}}])}$$

where  $n$  is the width of the age interval.

### 9. Simulation of 2021 life tables and life expectancy estimates

Due to the provisional nature of the data used to estimate each country's 2021 life expectancy, we generated distributions of 2021 life expectancies for each country by adding 10% random uncertainty to  $q_{x_{2021}}$  and 10% random uncertainty to  $a_{x_{2021}}$  and using Python version 3.10.2 to simulate 50,000 life tables.<sup>7</sup> We report the median ( $P_{50}$ ) estimate for each life expectancy as well as the fifth ( $P_5$ ) and ninety-fifth ( $P_{95}$ ) percentiles as plausible ranges for 2021 life expectancies. This “credible range” was calculated for the total, female, and male populations of each country, and for the United States, also by race-ethnicity.

### 10. Validation of life expectancy estimates for U.S. (2019 and 2020) and peer countries (2020).

In the table below, we contrast values of 2019 U.S. life expectancy reported in the HMD and the official estimated reported by NCHS<sup>7</sup> with our estimates of 2019 U.S. life expectancy derived from our method. We also contrast our estimates with 2020 U.S. life expectancy estimates reported by NCHS.<sup>8</sup> The HMD does not currently report 2020 life expectancy for the United States. For 2020, we include the credible range as described above.

|                      | 2019 Life Expectancy |                    |          | 2020 Life Expectancy |          |                  |
|----------------------|----------------------|--------------------|----------|----------------------|----------|------------------|
|                      | HMD                  | NCHS* <sup>7</sup> | Estimate | NCHS* <sup>8</sup>   | Estimate | Credible Range** |
| <b>United States</b> |                      |                    |          |                      |          |                  |
| Total                | 79.16                | 78.8               | 78.86    | 77.0                 | 76.99    | (76.83-77.16)    |
| Male                 | 76.59                | 76.3               | 76.32    | 74.2                 | 74.19    | (74.02-74.36)    |
| Female               | 81.72                | 81.4               | 81.39    | 79.9                 | 79.88    | (79.72-80.04)    |

\* NCHS reports life expectancy to only one decimal place

\*\* Credible range = life expectancy values corresponding to the fifth ( $P_5$ ) and ninety-fifth ( $P_{95}$ ) percentiles from distributions of 50,000 simulated life tables.

U.S. life expectancy in 2019 reported in the HMD exceeds official NCHS reports of 2019 U.S. life expectancy by about 0.3 years (female) or 0.4 years (total).<sup>7</sup> Our method produces estimates that are nearly identical to those reported by NCHS (female: 81.39 vs. 81.4 and male: 76.32 vs. 76.3) or that fall between the values reported by the HMD and NCHS (total: 78.86 vs. 78.8 and 79.16). For 2020, NCHS estimates match our estimates exactly and fall in the middle of our credible range.

In the table below, we contrast HMD-reported male and female life expectancy for Belgium, Finland, Spain, and Switzerland in 2020 with life expectancy estimates derived from our method. For South Korea, we contrast male and female life expectancy reported in KOSIS with life expectancy estimates derived from our method. For each country examined, the values of 2020 life expectancy reported in the HMD fall within our estimated credible range.

|                    | <b>2020 Life Expectancy</b> |          |                 |
|--------------------|-----------------------------|----------|-----------------|
|                    | HMD                         | Estimate | Credible Range* |
| <b>Belgium</b>     |                             |          |                 |
| Male               | 78.53                       | 78.43    | (78.28-78.59)   |
| Female             | 83.06                       | 82.96    | (82.81-83.11)   |
| <b>Finland</b>     |                             |          |                 |
| Male               | 79.08                       | 79.05    | (78.89-79.21)   |
| Female             | 84.66                       | 84.56    | (84.42-84.72)   |
| <b>South Korea</b> |                             |          |                 |
| Male               | 80.49                       | 80.43    | (80.27-80.59)   |
| Female             | 86.47                       | 86.34    | (86.19-86.49)   |
| <b>Spain</b>       |                             |          |                 |
| Male               | 79.56                       | 79.39    | (79.23-79.56)   |
| Female             | 85.02                       | 84.87    | (84.73-85.02)   |
| <b>Switzerland</b> |                             |          |                 |
| Male               | 81.00                       | 80.87    | (80.72-81.02)   |
| Female             | 85.08                       | 84.97    | (84.83-85.12)   |

\* Credible range = life expectancy values corresponding to the fifth ( $P_5$ ) and ninety-fifth ( $P_{95}$ ) percentiles from distributions of 50,000 simulated life tables.

## References

1. National Center for Health Statistics. *Detailed Multiple Cause of Death Research Files*. Restricted-Use Vital Statistics Data. Accessed January 19, 2022. <https://www.cdc.gov/nchs/nvss/nvss-restricted-data.htm>
2. National Center for Health Statistics. *AH Excess Deaths by Sex, Age, and Race*. HealthData.gov. April 13, 2022. Accessed April 13, 2022. <https://data.cdc.gov/NCHS/AH-Excess-Deaths-by-Sex-Age-and-Race-and-Hispanic-/m74n-4hbs>
3. US Census Bureau. *Vintage 2020 Bridged-Race Postcensal Population Estimates*. Accessed March 13, 2022 [https://www.cdc.gov/nchs/nvss/bridged\\_race/data\\_documentation.htm#vintage2020](https://www.cdc.gov/nchs/nvss/bridged_race/data_documentation.htm#vintage2020)
4. Arias, E., and Xu, J. *United States life tables, 2018*. National Vital Statistics Reports; Vol 69, no.12. 2020. Hyattsville, MD: National Center for Health Statistics.
5. Human Mortality Database. *Short-term Mortality Fluctuations data series: original input data in standardized format*. University of California, Berkeley (USA), and Max Planck Institute for Demographic Research (Germany). April 25, 2022 Data Update. Accessed April 25, 2022. <https://www.mortality.org/>
6. Human Mortality Database. University of California, Berkeley (USA), and Max Planck Institute for Demographic Research (Germany). Accessed March 14, 2022. <https://www.mortality.org/>
7. Xu JQ, Murphy SL, Kochanek KD, and Arias E. Deaths: Final data for 2019. National Vital Statistics Reports; vol 70 no 08. Hyattsville, MD: National Center for Health Statistics. 2021.DOI: <https://dx.doi.org/10.15620/cdc:106058>.
8. Murphy SL, Kochanek KD, Xu JQ, Arias E. Mortality in the United States, 2020. NCHS Data Brief, no 427. Hyattsville, MD: National Center for Health Statistics. 2021. DOI: <https://dx.doi.org/10.15620/cdc:112079>.
9. Python Software Foundation. Python Language Reference, version 3.10.2. Accessed March 3, 2022. <http://www.python.org>

**11. Changes in female life expectancy (Panel A) and male life expectancy (Panel B), 2019-2020 and 2020-2021.**

**Panel A: Female**

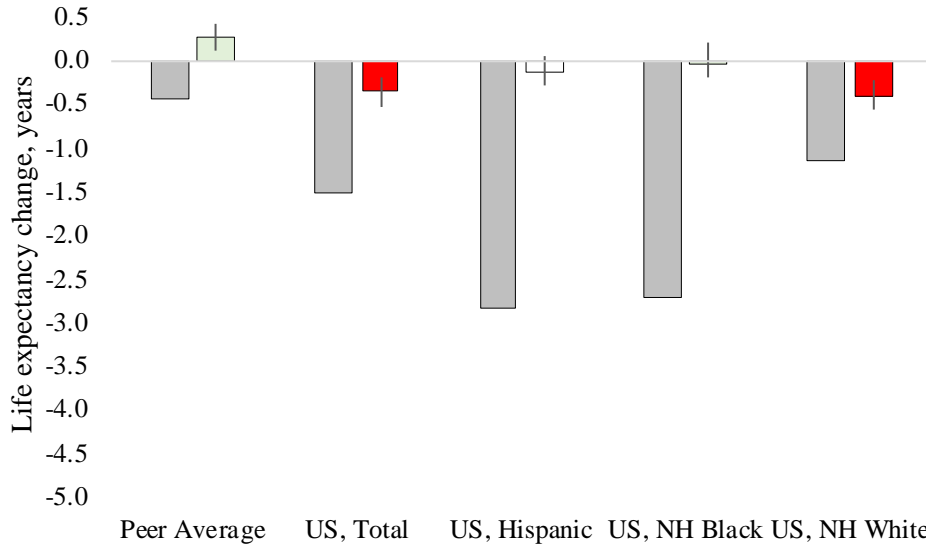

Note: 2019-2020 life expectancy change indicated by gray bar and 2020-2021 life expectancy change indicated by green bar (increase) or red bar (decrease). Vertical lines indicate "credible range" of 2020-2021 life expectancy change.

**Panel B: Male**

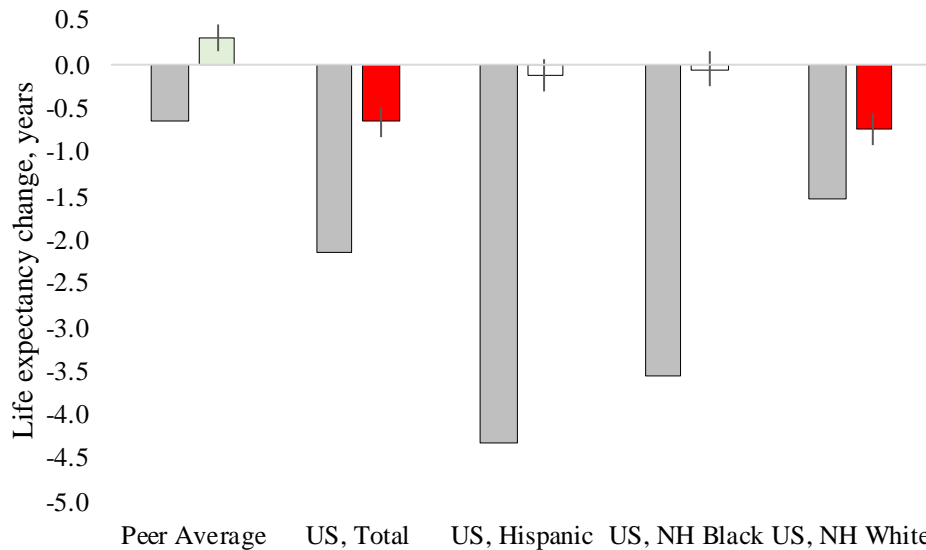

Note: 2019-2020 life expectancy change indicated by gray bar and 2020-2021 life expectancy change indicated by green bar (increase) or red bar (decrease). Vertical line indicates "credible range" of 2020-2021 life expectancy change.



## 12. Examples of analytic scripts in Stata and Python for merging data, simulating life tables, and estimating median values and credible ranges of life expectancy estimates.

### Import HMD-STMF Death Counts

```
*** Import HMDB Raw .txt Data ***

*** Peer Group 2021 LEs - HMD-STMF 3/28/22 Data

* Peer Group: 19 Countries: AUT, BEL, CHE, DEN, ESP, FIN, FRA, DEU, KOR, ISR,
ITA, NLD, NZL, NOR, POR, SWE, UK-ENG/W, UK-NIR, UK-SCO
* STMF RR: use for NZL & KOR
* 2020 HMD LT = BEL, CHE, DEN, ESP, FIN, NOR, POR, SWE
* 2019 HMD LT = AUT, NLD (ISR & NZL Central Stats Sources)
* 2018 HMD LT = DEU (Central Stats), FRA, ITA, UK-ENG/W, UK-NIR, UK-SCO
* 2020 & 2019 LT KOSIS = KOR
* So 2021 LT generated from 2021:2020 RR (BEL, CHE, DEN, ESP, FIN, KOR, NOR,
POR, SWE), 2021:2019 RR (AUT, ISR, NLD, NZL), and from 2020:2018 (DEU, FRA,
ITA, UK)

*****
*** Austria ***
*****

import delimited "/Users/ryan/Documents/Papers/LE
Trends_COVID/STMFinput_3_28_22/AUTstmf.csv", encoding(ISO-8859-1) clear

keep year week sex age deaths

keep if year == 2019 | year == 2020 | year == 2021

drop if age == "TOT"
drop if age == "UNK"

destring age, gen(age5)
drop age
rename age5 age

* Estimate Yearly Age-specific Death Count - Sum across the 52 weeks

sort sex year age

collapse (sum) deaths, by(sex year age)

gen nage = .
replace nage = 1 if age ==0
replace nage = 2 if age ==5
replace nage = 3 if age ==10
replace nage = 4 if age ==15
replace nage = 5 if age ==20
replace nage = 6 if age ==25
replace nage = 7 if age ==30
replace nage = 8 if age ==35
replace nage = 9 if age ==40
```

```

replace nage = 10 if age ==45
replace nage = 11 if age ==50
replace nage = 12 if age ==55
replace nage = 13 if age ==60
replace nage = 14 if age ==65
replace nage = 15 if age ==70
replace nage = 16 if age ==75
replace nage = 17 if age ==80
replace nage = 18 if age ==85
replace nage = 19 if age ==90

gen country = "Austria"

sort year sex nage

save "/Users/ryan/Documents/Papers/LE
Trends_COVID/STMFinput_3_28_22/austria_1921 deaths.dta", replace

*****
*** Belgium ***
*****

import delimited "/Users/ryan/Documents/Papers/LE
Trends_COVID/STMFinput_3_28_22/BELstmf.csv", encoding(ISO-8859-1) clear

keep year week sex age deaths

keep if year == 2020 | year == 2021

drop if age == "TOT"
drop if age == "UNK"

destring age, gen(age5)
drop age
rename age5 age

* Estimate Yearly Age-specific Death Count - Sum across the 52 weeks

sort sex year age

collapse (sum) deaths, by(sex year age)

gen nage = .
replace nage = 1 if age ==0
replace nage = 2 if age ==5
replace nage = 3 if age ==10
replace nage = 4 if age ==15
replace nage = 5 if age ==20
replace nage = 6 if age ==25
replace nage = 7 if age ==30
replace nage = 8 if age ==35
replace nage = 9 if age ==40
replace nage = 10 if age ==45
replace nage = 11 if age ==50
replace nage = 12 if age ==55

```

```

replace nage = 13 if age ==60
replace nage = 14 if age ==65
replace nage = 15 if age ==70
replace nage = 16 if age ==75
replace nage = 17 if age ==80
replace nage = 18 if age ==85
replace nage = 19 if age ==90

gen country = "Belgium"

sort year sex nage

save "/Users/ryan/Documents/Papers/LE
Trends_COVID/STMFinput_3_28_22/belgium_2021 deaths.dta", replace

*****
*** Denmark ***
*****

import delimited "/Users/ryan/Documents/Papers/LE
Trends_COVID/STMFinput_3_28_22/DNKstmf.csv", encoding(ISO-8859-1) clear

keep year week sex age deaths

keep if year == 2020 | year == 2021

drop if age == "TOT"
drop if age == "UNK"

destring age, gen(age5)
drop age
rename age5 age

* Estimate Yearly Age-specific Death Count - Sum across the 52 weeks

sort sex year age

collapse (sum) deaths, by(sex year age)

gen nage = .
replace nage = 1 if age ==0
replace nage = 2 if age ==5
replace nage = 3 if age ==10
replace nage = 4 if age ==15
replace nage = 5 if age ==20
replace nage = 6 if age ==25
replace nage = 7 if age ==30
replace nage = 8 if age ==35
replace nage = 9 if age ==40
replace nage = 10 if age ==45
replace nage = 11 if age ==50
replace nage = 12 if age ==55
replace nage = 13 if age ==60
replace nage = 14 if age ==65
replace nage = 15 if age ==70

```

```

replace nage = 16 if age ==75
replace nage = 17 if age ==80
replace nage = 18 if age ==85
replace nage = 19 if age ==90
replace nage = 20 if age ==95
replace nage = 21 if age ==100

gen country = "Denmark"

sort year sex nage

save "/Users/ryan/Documents/Papers/LE
Trends_COVID/STMFinput_3_28_22/denmark_2021 deaths.dta", replace

*****
*** Finland ***
*****

import delimited "/Users/ryan/Documents/Papers/LE
Trends_COVID/STMFinput_3_28_22/FINstmf.csv", encoding(ISO-8859-1) clear

keep year week sex age deaths

keep if year == 2020 | year == 2021

drop if age == "TOT"
drop if age == "UNK"

destring age, gen(age5)
drop age
rename age5 age

* Estimate Yearly Age-specific Death Count - Sum across the 52 weeks

sort sex year age

collapse (sum) deaths, by(sex year age)

gen nage = .
replace nage = 1 if age ==0
replace nage = 2 if age ==5
replace nage = 3 if age ==10
replace nage = 4 if age ==15
replace nage = 5 if age ==20
replace nage = 6 if age ==25
replace nage = 7 if age ==30
replace nage = 8 if age ==35
replace nage = 9 if age ==40
replace nage = 10 if age ==45
replace nage = 11 if age ==50
replace nage = 12 if age ==55
replace nage = 13 if age ==60
replace nage = 14 if age ==65
replace nage = 15 if age ==70
replace nage = 16 if age ==75

```

```

replace nage = 17 if age ==80
replace nage = 18 if age ==85
replace nage = 19 if age ==90

gen country = "Finland"

sort year sex nage

save "/Users/ryan/Documents/Papers/LE
Trends_COVID/STMFinput_3_28_22/finland_2021 deaths.dta", replace

*****
*** France ***
*****

import delimited "/Users/ryan/Documents/Papers/LE
Trends_COVID/STMFinput_3_28_22/FRATNPstmf.csv", encoding(ISO-8859-1) clear

keep year week sex age deaths

keep if year == 2018 | year == 2019 | year == 2020 | year == 2021

drop if age == "TOT"
drop if age == "UNK"

destring age, gen(age5)
drop age
rename age5 age

* Estimate Yearly Age-specific Death Count - Sum across the 52 weeks

sort sex year age

collapse (sum) deaths, by(sex year age)

gen agen = age
replace agen = 0 if age == 1
replace agen = 90 if age == 95

sort year sex agen

collapse (sum) deaths, by(year sex agen)

rename agen age

gen nage = .
replace nage = 1 if age ==0
replace nage = 2 if age ==5
replace nage = 3 if age ==10
replace nage = 4 if age ==15
replace nage = 5 if age ==20
replace nage = 6 if age ==25
replace nage = 7 if age ==30

```

```

replace nage = 8 if age ==35
replace nage = 9 if age ==40
replace nage = 10 if age ==45
replace nage = 11 if age ==50
replace nage = 12 if age ==55
replace nage = 13 if age ==60
replace nage = 14 if age ==65
replace nage = 15 if age ==70
replace nage = 16 if age ==75
replace nage = 17 if age ==80
replace nage = 18 if age ==85
replace nage = 19 if age ==90

gen country = "France"

sort year sex nage

save "/Users/ryan/Documents/Papers/LE
Trends_COVID/STMFinput_3_28_22/france_1821 deaths.dta", replace

*****
*** Germany ***
*****

import delimited "/Users/ryan/Documents/Papers/LE
Trends_COVID/STMFinput_3_28_22/DEUTNPstmf.csv", encoding(ISO-8859-1) clear

keep year week sex age deaths

keep if year == 2018 | year == 2019 | year == 2020 | year == 2021

drop if age == "TOT"
drop if age == "UNK"

destring age, gen(age5)
drop age
rename age5 age

* Estimate Yearly Age-specific Death Count - Sum across the 52 weeks

sort sex year age

collapse (sum) deaths, by(sex year age)

gen nage = .
replace nage = 1 if age ==0
replace nage = 2 if age ==30
replace nage = 3 if age ==35
replace nage = 4 if age ==40
replace nage = 5 if age ==45
replace nage = 6 if age ==50
replace nage = 7 if age ==55
replace nage = 8 if age ==60
replace nage = 9 if age ==65
replace nage = 10 if age ==70

```

```

replace nage = 11 if age ==75
replace nage = 12 if age ==80
replace nage = 13 if age ==85
replace nage = 14 if age ==90
replace nage = 15 if age ==95

gen country = "Germany"

sort year sex nage

save "/Users/ryan/Documents/Papers/LE
Trends_COVID/STMFinput_3_28_22/germany_1821 deaths.dta", replace

*****
*** Israel ***
*****

import delimited "/Users/ryan/Documents/Papers/LE
Trends_COVID/STMFinput_3_28_22/ISRstmf.csv", encoding(ISO-8859-1) clear

keep year week sex age deaths

keep if year == 2019 | year == 2020 | year == 2021

drop if age == "TOT"
drop if age == "UNK"

destring age, gen(age5)
drop age
rename age5 age

* Estimate Yearly Age-specific Death Count - Sum across the 52 weeks

sort sex year age

collapse (sum) deaths, by(sex year age)

gen nage = .
replace nage = 1 if age ==0
replace nage = 2 if age ==20
replace nage = 3 if age ==30
replace nage = 4 if age ==40
replace nage = 5 if age ==50
replace nage = 6 if age ==60
replace nage = 7 if age ==70
replace nage = 8 if age ==80

gen country = "Israel"

sort year sex nage

save "/Users/ryan/Documents/Papers/LE
Trends_COVID/STMFinput_3_28_22/israel_1921 deaths.dta", replace

```

```

*****
*** Italy ***
*****

import delimited "/Users/ryan/Documents/Papers/LE
Trends_COVID/STMFinput_3_28_22/ITastmf.csv", encoding(ISO-8859-1) clear

keep year week sex age deaths

keep if year == 2018 | year == 2019 | year == 2020 | year == 2021

drop if age == "TOT"
drop if age == "UNK"

destring age, gen(age5)
drop age
rename age5 age

* Estimate Yearly Age-specific Death Count - Sum across the 52 weeks

sort sex year age

collapse (sum) deaths, by(sex year age)

gen agen = age
replace agen = 0 if age == 1
replace agen = 90 if age == 95
replace agen = 90 if age == 100

sort year sex agen

collapse (sum) deaths, by(year sex agen)

rename agen age

gen nage = .
replace nage = 1 if age ==0
replace nage = 2 if age ==5
replace nage = 3 if age ==10
replace nage = 4 if age ==15
replace nage = 5 if age ==20
replace nage = 6 if age ==25
replace nage = 7 if age ==30
replace nage = 8 if age ==35
replace nage = 9 if age ==40
replace nage = 10 if age ==45
replace nage = 11 if age ==50
replace nage = 12 if age ==55
replace nage = 13 if age ==60
replace nage = 14 if age ==65
replace nage = 15 if age ==70
replace nage = 16 if age ==75
replace nage = 17 if age ==80
replace nage = 18 if age ==85
replace nage = 19 if age ==90

```



```

gen country = "Italy"

sort year sex nage

save "/Users/ryan/Documents/Papers/LE
Trends_COVID/STMFinput_3_28_22/italy_1821 deaths.dta", replace

*****
* Netherlands *
*****

import delimited "/Users/ryan/Documents/Papers/LE
Trends_COVID/STMFinput_3_28_22/NLDstmf.csv", encoding(ISO-8859-1) clear

keep year week sex age deaths

keep if year == 2019 | year == 2020 | year == 2021

drop if age == "TOT"
drop if age == "UNK"

destring age, gen(age5)
drop age
rename age5 age

* Estimate Yearly Age-specific Death Count - Sum across the 52 weeks

sort sex year age

collapse (sum) deaths, by(sex year age)

gen nage = .
replace nage = 1 if age ==0
replace nage = 2 if age ==5
replace nage = 3 if age ==10
replace nage = 4 if age ==15
replace nage = 5 if age ==20
replace nage = 6 if age ==25
replace nage = 7 if age ==30
replace nage = 8 if age ==35
replace nage = 9 if age ==40
replace nage = 10 if age ==45
replace nage = 11 if age ==50
replace nage = 12 if age ==55
replace nage = 13 if age ==60
replace nage = 14 if age ==65
replace nage = 15 if age ==70
replace nage = 16 if age ==75
replace nage = 17 if age ==80
replace nage = 18 if age ==85
replace nage = 19 if age ==90

gen country = "Netherlands"

```

```

sort year sex nage

save "/Users/ryan/Documents/Papers/LE
Trends_COVID/STMFinput_3_28_22/netherlands_1921 deaths.dta", replace

*****
* New Zealand: Use STMF Rates *
*****

*****
* South Korea: Use STMF Rates *
*****

*****
*** Norway ***
*****

import delimited "/Users/ryan/Documents/Papers/LE
Trends_COVID/STMFinput_3_28_22/NORstmf.csv", encoding(ISO-8859-1) clear

keep year week sex age deaths

keep if year == 2020 | year == 2021

drop if age == "TOT"
drop if age == "UNK"

destring age, gen(age5)
drop age
rename age5 age

* Estimate Yearly Age-specific Death Count - Sum across the 52 weeks

sort sex year age

collapse (sum) deaths, by(sex year age)

gen nage = .
replace nage = 1 if age ==0
replace nage = 2 if age ==5
replace nage = 3 if age ==10
replace nage = 4 if age ==15
replace nage = 5 if age ==20
replace nage = 6 if age ==25
replace nage = 7 if age ==30
replace nage = 8 if age ==35
replace nage = 9 if age ==40
replace nage = 10 if age ==45
replace nage = 11 if age ==50
replace nage = 12 if age ==55
replace nage = 13 if age ==60
replace nage = 14 if age ==65
replace nage = 15 if age ==70
replace nage = 16 if age ==75

```

```

replace nage = 17 if age ==80
replace nage = 18 if age ==85
replace nage = 19 if age ==90
replace nage = 20 if age ==95
replace nage = 21 if age ==100

gen country = "Norway"

sort year sex nage

save "/Users/ryan/Documents/Papers/LE
Trends_COVID/STMFinput_3_28_22/norway_2021 deaths.dta", replace

*****
*** Portugal ***
*****

import delimited "/Users/ryan/Documents/Papers/LE
Trends_COVID/STMFinput_3_28_22/PRTstmf.csv", encoding(ISO-8859-1) clear

keep year week sex age deaths

keep if year == 2020 | year == 2021

drop if age == "TOT"
drop if age == "UNK"

destring age, gen(age5)
drop age
rename age5 age

* Estimate Yearly Age-specific Death Count - Sum across the 52 weeks

sort sex year age

collapse (sum) deaths, by(sex year age)

gen agen = age
replace agen = 85 if age == 90

collapse (sum) deaths, by(sex year agen)

rename agen age

gen nage = .
replace nage = 1 if age ==0
replace nage = 2 if age ==5
replace nage = 3 if age ==10
replace nage = 4 if age ==15
replace nage = 5 if age ==20
replace nage = 6 if age ==25
replace nage = 7 if age ==30
replace nage = 8 if age ==35
replace nage = 9 if age ==40
replace nage = 10 if age ==45

```

```

replace nage = 11 if age ==50
replace nage = 12 if age ==55
replace nage = 13 if age ==60
replace nage = 14 if age ==65
replace nage = 15 if age ==70
replace nage = 16 if age ==75
replace nage = 17 if age ==80
replace nage = 18 if age ==85

gen country = "Portugal"

sort year sex nage

save "/Users/ryan/Documents/Papers/LE
Trends_COVID/STMFinput_3_28_22/portugal_2021 deaths.dta", replace

*****
*** Spain ***
*****

import delimited "/Users/ryan/Documents/Papers/LE
Trends_COVID/STMFinput_3_28_22/ESPstmf.csv", encoding(ISO-8859-1) clear

keep year week sex age deaths

keep if year == 2020 | year == 2021

drop if age == "TOT"
drop if age == "UNK"

destring age, gen(age5)
drop age
rename age5 age

* Estimate Yearly Age-specific Death Count - Sum across the 52 weeks

sort sex year age

collapse (sum) deaths, by(sex year age)

gen nage = .
replace nage = 1 if age ==0
replace nage = 2 if age ==5
replace nage = 3 if age ==10
replace nage = 4 if age ==15
replace nage = 5 if age ==20
replace nage = 6 if age ==25
replace nage = 7 if age ==30
replace nage = 8 if age ==35
replace nage = 9 if age ==40
replace nage = 10 if age ==45
replace nage = 11 if age ==50
replace nage = 12 if age ==55
replace nage = 13 if age ==60
replace nage = 14 if age ==65

```

```

replace nage = 15 if age ==70
replace nage = 16 if age ==75
replace nage = 17 if age ==80
replace nage = 18 if age ==85
replace nage = 19 if age ==90

gen country = "Spain"

sort year sex nage

save "/Users/ryan/Documents/Papers/LE
Trends_COVID/STMFinput_3_28_22/spain_2021 deaths.dta", replace

*****
*** Sweden ***
*****

import delimited "/Users/ryan/Documents/Papers/LE
Trends_COVID/STMFinput_3_28_22/SWEstmf.csv", encoding(ISO-8859-1) clear

keep year week sex age deaths

keep if year == 2020 | year == 2021

drop if age == "TOT"
drop if age == "UNK"

destring age, gen(age5)
drop age
rename age5 age

* Estimate Yearly Age-specific Death Count - Sum across the 52 weeks

sort sex year age

collapse (sum) deaths, by(sex year age)

gen nage = .
replace nage = 1 if age ==0
replace nage = 2 if age ==5
replace nage = 3 if age ==10
replace nage = 4 if age ==15
replace nage = 5 if age ==20
replace nage = 6 if age ==25
replace nage = 7 if age ==30
replace nage = 8 if age ==35
replace nage = 9 if age ==40
replace nage = 10 if age ==45
replace nage = 11 if age ==50
replace nage = 12 if age ==55
replace nage = 13 if age ==60
replace nage = 14 if age ==65
replace nage = 15 if age ==70
replace nage = 16 if age ==75
replace nage = 17 if age ==80

```

```

replace nage = 18 if age ==85
replace nage = 19 if age ==90

gen country = "Sweden"

sort year sex nage

save "/Users/ryan/Documents/Papers/LE
Trends_COVID/STMFinput_3_28_22/sweden_2021 deaths.dta", replace

*****
*** Switzerland ***
*****

import delimited "/Users/ryan/Documents/Papers/LE
Trends_COVID/STMFinput_3_28_22/CHEstmf.csv", encoding(ISO-8859-1) clear

keep year week sex age deaths

keep if year == 2020 | year == 2021

drop if age == "TOT"
drop if age == "UNK"

destring age, gen(age5)
drop age
rename age5 age

* Estimate Yearly Age-specific Death Count - Sum across the 52 weeks

sort sex year age

collapse (sum) deaths, by(sex year age)

gen nage = .
replace nage = 1 if age ==0
replace nage = 2 if age ==5
replace nage = 3 if age ==10
replace nage = 4 if age ==15
replace nage = 5 if age ==20
replace nage = 6 if age ==25
replace nage = 7 if age ==30
replace nage = 8 if age ==35
replace nage = 9 if age ==40
replace nage = 10 if age ==45
replace nage = 11 if age ==50
replace nage = 12 if age ==55
replace nage = 13 if age ==60
replace nage = 14 if age ==65
replace nage = 15 if age ==70
replace nage = 16 if age ==75
replace nage = 17 if age ==80
replace nage = 18 if age ==85
replace nage = 19 if age ==90

```

```

gen country = "Switzerland"

sort year sex nage

save "/Users/ryan/Documents/Papers/LE
Trends_COVID/STMFinput_3_28_22/switzerland_2021 deaths.dta", replace

***** United Kingdom: Northern Ireland, Scotland, England + Wales *****

*****
*** Northern Ireland ***
*****

*****
* Use full ages for 2018, 2019, and 2020 *
*****

import delimited "/Users/ryan/Documents/Papers/LE
Trends_COVID/STMFinput_3_28_22/GBR_NIRstmf.csv", encoding(ISO-8859-1) clear

keep year week sex age deaths

keep if year == 2018 | year == 2019 | year == 2020

drop if age == "TOT"
drop if age == "UNK"

destring age, gen(age5)
drop age
rename age5 age

collapse (sum) deaths, by(sex year age)

gen age20 = .
replace age20 = age
replace age20 = 0 if age20 == 1

sort sex year age20

collapse (sum) deaths, by(sex year age20)

rename age20 age

gen nage = .
replace nage = 1 if age ==0
replace nage = 2 if age ==5
replace nage = 3 if age ==10
replace nage = 4 if age ==15
replace nage = 5 if age ==20
replace nage = 6 if age ==25
replace nage = 7 if age ==30
replace nage = 8 if age ==35
replace nage = 9 if age ==40

```

```

replace nage = 10 if age ==45
replace nage = 11 if age ==50
replace nage = 12 if age ==55
replace nage = 13 if age ==60
replace nage = 14 if age ==65
replace nage = 15 if age ==70
replace nage = 16 if age ==75
replace nage = 17 if age ==80
replace nage = 18 if age ==85
replace nage = 19 if age ==90

gen country = "Northern Ireland - 2018-2020"

sort year sex nage

save "/Users/ryan/Documents/Papers/LE Trends_COVID/STMFinput_3_28_22/northern
ireland_1820 deaths.dta", replace

*****
* Use Trimmed Ages for 2018 and 2021 *
*****

import delimited "/Users/ryan/Documents/Papers/LE
Trends_COVID/STMFinput_3_28_22/GBR_NIRstmf.csv", encoding(ISO-8859-1) clear

keep year week sex age deaths

keep if year == 2018 | year == 2021

drop if age == "TOT"
drop if age == "UNK"

destring age, gen(age5)
drop age
rename age5 age

* Estimate Yearly Age-specific Death Count - Sum across the 52 weeks, but
2018 and 2021 have different age profiles

collapse (sum) deaths, by(sex year age)

gen age21 = .
replace age21 = age if year == 2021
replace age21 = 0 if age21 == 1
replace age21 = 0 if age < 15 & year == 2018
replace age21 = 15 if age >= 15 & age < 45 & year == 2018
replace age21 = 45 if age >= 45 & age < 65 & year == 2018
replace age21 = 65 if age >= 65 & age < 75 & year == 2018
replace age21 = 75 if age >= 75 & age < 85 & year == 2018
replace age21 = 85 if age >= 85 & year == 2018

sort sex year age21

collapse (sum) deaths, by(sex year age21)

```



```

rename age21 age

gen nage = .
replace nage = 1 if age ==0
replace nage = 2 if age ==15
replace nage = 3 if age ==45
replace nage = 4 if age ==65
replace nage = 5 if age ==75
replace nage = 6 if age ==85

gen country = "Northern Ireland"

sort year sex nage

save "/Users/ryan/Documents/Papers/LE Trends_COVID/STMFinput_3_28_22/northern
ireland_1821 deaths.dta", replace

*****
*** Scotland ***
*****

import delimited "/Users/ryan/Documents/Papers/LE
Trends_COVID/STMFinput_3_28_22/GBR_SC0stmf.csv", encoding(ISO-8859-1) clear

keep year week sex age deaths

keep if year == 2018 | year == 2019 | year == 2020 | year == 2021

drop if age == "TOT"
drop if age == "UNK"

destring age, gen(age5)
drop age
rename age5 age

* Estimate Yearly Age-specific Death Count - Sum across the 52 weeks

sort sex year age

collapse (sum) deaths, by(sex year age)

gen age21 = .
replace age21 = age
replace age21 = 0 if age21 == 1
replace age21 = 90 if age21 == 95

sort sex year age21

collapse (sum) deaths, by(sex year age21)

rename age21 age

gen nage = .
replace nage = 1 if age ==0

```

```

replace nage = 2 if age ==5
replace nage = 3 if age ==10
replace nage = 4 if age ==15
replace nage = 5 if age ==20
replace nage = 6 if age ==25
replace nage = 7 if age ==30
replace nage = 8 if age ==35
replace nage = 9 if age ==40
replace nage = 10 if age ==45
replace nage = 11 if age ==50
replace nage = 12 if age ==55
replace nage = 13 if age ==60
replace nage = 14 if age ==65
replace nage = 15 if age ==70
replace nage = 16 if age ==75
replace nage = 17 if age ==80
replace nage = 18 if age ==85
replace nage = 19 if age ==90

gen country = "Scotland"

sort year sex nage

save "/Users/ryan/Documents/Papers/LE
Trends_COVID/STMFinput_3_28_22/scotland_1821 deaths.dta", replace

*****
*** England & Wales ***
*****

import delimited "/Users/ryan/Documents/Papers/LE
Trends_COVID/STMFinput_3_28_22/GBRTENWstmf.csv", encoding(ISO-8859-1) clear

keep year week sex age deaths

keep if year == 2018 | year == 2019 | year == 2020 | year == 2021

drop if age == "TOT"
drop if age == "UNK"

destring age, gen(age5)
drop age
rename age5 age

* Estimate Yearly Age-specific Death Count - Sum across the 52 weeks, but
2018/2019 and 2020/2021 have different age profiles

collapse (sum) deaths, by(sex year age)

gen age20 = .
replace age20 = age if year == 2018
replace age20 = age if year == 2019
replace age20 = 0 if age == 1 & year == 2018
replace age20 = 0 if age == 1 & year == 2019

```

```

replace age20 = 0 if age < 15 & year == 2020
replace age20 = 0 if age < 15 & year == 2021
replace age20 = 15 if age >= 15 & age < 45 & year == 2020
replace age20 = 15 if age >= 15 & age < 45 & year == 2021
replace age20 = 45 if age >= 45 & age < 65 & year == 2020
replace age20 = 45 if age >= 45 & age < 65 & year == 2021
replace age20 = 65 if age >= 65 & age < 75 & year == 2020
replace age20 = 65 if age >= 65 & age < 75 & year == 2021
replace age20 = 75 if age >= 75 & age < 85 & year == 2020
replace age20 = 75 if age >= 75 & age < 85 & year == 2021
replace age20 = 85 if age >= 85 & year == 2020
replace age20 = 85 if age >= 85 & year == 2021

sort sex year age20

collapse (sum) deaths, by(sex year age20)

rename age20 age

gen nage = .
replace nage = 1 if age ==0
replace nage = 2 if age ==15
replace nage = 3 if age ==45
replace nage = 4 if age ==65
replace nage = 5 if age ==75
replace nage = 6 if age ==85

gen country = "England & Wales"

sort year sex nage

save "/Users/ryan/Documents/Papers/LE
Trends_COVID/STMFinput_3_28_22/england_wales_1821 deaths.dta", replace

```

## Merge HMD-STMF Death Counts with Peer Population Counts

```
*** Merge Population 2018, 2019, 2020, 2021 with Death Counts from STMF  
Original Source 2018, 2019, 2020, 2021 ***
```

```
*****  
*** Austria ***  
*****
```

```
import excel "/Users/ryan/Desktop/Dropbox_sync/Dropbox/My Mac (Ryan's  
MacBook)/Documents/Papers/LE Trends_COVID/Peer Pop_2021/pop  
input/aut_pop_21.xlsx", sheet("Sheet1") firstrow clear
```

```
sort year sex nage
```

```
merge year sex nage using "/Users/ryan/Documents/Papers/LE  
Trends_COVID/STMFinput_3_28_22/austria_1921 deaths.dta"
```

```
gen mx = (deaths/pop)*100000
```

```
drop _merge
```

```
* Mx Rate Ratio b/w 2020 and 2019 and b/w 2021 and 2019
```

```
tempfile a b c d
```

```
sort country
```

```
save `a'
```

```
keep if year == 2019
```

```
collapse (mean) mx_19=mx, by(sex nage)
```

```
save `b'
```

```
use `a', clear
```

```
sort sex nage
```

```
keep if year == 2020
```

```
collapse (mean) mx_20=mx, by(sex nage)
```

```
save `c'
```

```
merge using `b'
```

```
drop _merge
```

```
save `c', replace
```

```

use `a', clear

sort sex nage

keep if year == 2021

sort sex nage

save `d'

merge using `c'

drop _merge

* Estimate RR

gen rr21 = mx/mx_19
gen rr20 = mx_20/mx_19

save "/Users/ryan/Desktop/Dropbox_sync/Dropbox/My Mac (Ryan's
MacBook)/Documents/Papers/LE Trends_COVID/HMDB
data/peer_STMF/2021_2020_2019_2018_rate_ratios_original_source
data/austria_19.dta", replace

*****
*** Belgium ***
*****

import excel "/Users/ryan/Desktop/Dropbox_sync/Dropbox/My Mac (Ryan's
MacBook)/Documents/Papers/LE Trends_COVID/Peer Pop_2021/pop
input/bel_pop_21.xlsx", sheet("Sheet1") firstrow clear

sort year sex nage

merge year sex nage using "/Users/ryan/Documents/Papers/LE
Trends_COVID/STMFinput_3_28_22/belgium_2021_deaths.dta"

gen mx = (deaths/pop)*100000

drop _merge

drop if year == .

* Mx Rate Ratio b/w 2021 and 2020

tempfile a b c

sort country

save `a'

```

```

keep if year == 2020

collapse (mean) mx_20=mx, by(sex nage)

save `b'

use `a', clear

sort sex nage

keep if year == 2021

sort sex nage

save `c'

merge using `b'

drop _merge

* Estimate RR

gen rr21 = mx/mx_20

save "/Users/ryan/Desktop/Dropbox_sync/Dropbox/My Mac (Ryan's
MacBook)/Documents/Papers/LE Trends_COVID/HMDB
data/peer_STMF/2021_2020_2019_2018 rate ratios_original source
data/belgium_20.dta", replace

*****
*** Denmark ***
*****

import excel "/Users/ryan/Desktop/Dropbox_sync/Dropbox/My Mac (Ryan's
MacBook)/Documents/Papers/LE Trends_COVID/Peer Pop_2021/pop
input/den_pop_21.xlsx", sheet("Sheet1") firstrow clear

sort year sex nage

merge year sex nage using "/Users/ryan/Documents/Papers/LE
Trends_COVID/STMFinput_3_28_22/denmark_2021 deaths.dta"

gen mx = (deaths/pop)*100000

drop _merge

* Mx Rate Ratio b/w 2021 and 2020

tempfile a b c

sort country

save `a'

```

```

keep if year == 2020

collapse (mean) mx_20=mx, by(sex nage)

save `b'

use `a', clear

sort sex nage

keep if year == 2021

sort sex nage

save `c'

merge using `b'

drop _merge

* Estimate RR

gen rr21 = mx/mx_20

save "/Users/ryan/Desktop/Dropbox_sync/Dropbox/My Mac (Ryan's
MacBook)/Documents/Papers/LE Trends_COVID/HMDB
data/peer_STMF/2021_2020_2019_2018 rate ratios_original source
data/denmark_20.dta", replace

*****
*** Finland ***
*****

import excel "/Users/ryan/Desktop/Dropbox_sync/Dropbox/My Mac (Ryan's
MacBook)/Documents/Papers/LE Trends_COVID/Peer Pop_2021/pop
input/fin_pop_21.xlsx", sheet("Sheet1") firstrow clear

sort year sex nage

merge year sex nage using "/Users/ryan/Documents/Papers/LE
Trends_COVID/STMFinput_3_28_22/finland_2021 deaths.dta"

gen mx = (deaths/pop)*100000

drop _merge

* Mx Rate Ratio b/w 2021 and 2020

tempfile a b c

sort country

```

```

save `a'

keep if year == 2020

collapse (mean) mx_20=mx, by(sex nage)

save `b'

use `a', clear

sort sex nage

keep if year == 2021

sort sex nage

save `c'

merge using `b'

drop _merge

* Estimate RR

gen rr21 = mx/mx_20

save "/Users/ryan/Desktop/Dropbox_sync/Dropbox/My Mac (Ryan's
MacBook)/Documents/Papers/LE Trends_COVID/HMDB
data/peer_STMF/2021_2020_2019_2018 rate ratios_original source
data/finland_20.dta", replace

*****
*** France ***
*****

import excel "/Users/ryan/Desktop/Dropbox_sync/Dropbox/My Mac (Ryan's
MacBook)/Documents/Papers/LE Trends_COVID/Peer Pop_2021/pop
input/fra_pop_21.xlsx", sheet("Sheet1") firstrow clear

sort year sex nage

merge year sex nage using "/Users/ryan/Documents/Papers/LE
Trends_COVID/STMFinput_3_28_22/france_1821 deaths.dta"

gen mx = (deaths/pop)*100000

drop _merge

* Mx Rate Ratio b/w 2021 and 2018 and b/w 2020 and 2018 and b/w 2019 and 2018

tempfile a b c d

```



```

sort country
save `a'

keep if year == 2018
collapse (mean) mx_18=mx, by(sex nage)
save `b'

use `a', clear
sort sex nage
keep if year == 2019
collapse (mean) mx_19=mx, by(sex nage)
save `c'

merge using `b'
drop _merge
save `c', replace

use `a', clear
sort sex nage
keep if year == 2020
collapse (mean) mx_20=mx, by(sex nage)
merge using `c'
drop _merge
save `d'

use `a', clear
sort sex nage
keep if year == 2021
merge using `d'

* Estimate RR
gen rr21 = mx/mx_18

```

```

gen rr20 = mx_20/mx_18
gen rr19 = mx_19/mx_18

save "/Users/ryan/Desktop/Dropbox_sync/Dropbox/My Mac (Ryan's
MacBook)/Documents/Papers/LE Trends_COVID/HMDB
data/peer_STMF/2021_2020_2019_2018 rate ratios_original source
data/france_18.dta", replace

*****
*** Germany ***
*****

import excel "/Users/ryan/Desktop/Dropbox_sync/Dropbox/My Mac (Ryan's
MacBook)/Documents/Papers/LE Trends_COVID/Peer Pop_2021/pop
input/ger_pop_21.xlsx", sheet("Sheet1") firstrow clear

sort year sex nage

merge year sex nage using "/Users/ryan/Documents/Papers/LE
Trends_COVID/STMFinput_3_28_22/germany_1821 deaths.dta"

gen mx = (deaths/pop)*100000

drop _merge

* Mx Rate Ratio b/w 2021 and 2018 and b/w 2020 and 2018 and b/w 2019 and 2018

tempfile a b c d

sort country

save `a'

keep if year == 2018

collapse (mean) mx_18=mx, by(sex nage)

save `b'

use `a', clear

sort sex nage

keep if year == 2019

collapse (mean) mx_19=mx, by(sex nage)

save `c'

merge using `b'

drop _merge

```

```

save `c', replace

use `a', clear

sort sex nage

keep if year == 2020

collapse (mean) mx_20=mx, by(sex nage)

merge using `c'

drop _merge

save `d'

use `a', clear

sort sex nage

keep if year == 2021

merge using `d'

* Estimate RR

gen rr21 = mx/mx_18
gen rr20 = mx_20/mx_18
gen rr19 = mx_19/mx_18

save "/Users/ryan/Desktop/Dropbox_sync/Dropbox/My Mac (Ryan's
MacBook)/Documents/Papers/LE Trends_COVID/HMDB
data/peer_STMF/2021_2020_2019_2018 rate ratios_original source
data/germany_18.dta", replace

*****
*** Israel ***
*****

import excel "/Users/ryan/Desktop/Dropbox_sync/Dropbox/My Mac (Ryan's
MacBook)/Documents/Papers/LE Trends_COVID/Peer Pop_2021/pop
input/isr_pop_21.xlsx", sheet("Sheet1") firstrow clear

sort year sex nage

merge year sex nage using "/Users/ryan/Documents/Papers/LE
Trends_COVID/STMFinput_3_28_22/israel_1921 deaths.dta"

gen mx = (deaths/pop)*100000

drop _merge

```

```

* Mx Rate Ratio b/w 2020 and 2019 and b/w 2021 and 2019

tempfile a b c d

sort country

save `a'

keep if year == 2019

collapse (mean) mx_19=mx, by(sex nage)

save `b'

use `a', clear

sort sex nage

keep if year == 2020

collapse (mean) mx_20=mx, by(sex nage)

save `c'

merge using `b'

drop _merge

save `c', replace

use `a', clear

sort sex nage

keep if year == 2021

sort sex nage

save `d'

merge using `c'

drop _merge

* Estimate RR

gen rr21 = mx/mx_19
gen rr20 = mx_20/mx_19

save "/Users/ryan/Desktop/Dropbox_sync/Dropbox/My Mac (Ryan's
MacBook)/Documents/Papers/LE Trends_COVID/HMDB
data/peer_STMF/2021_2020_2019_2018 rate ratios_original source
data/israel_19.dta", replac

```

```

*****
*** Italy ***
*****

import excel "/Users/ryan/Desktop/Dropbox_sync/Dropbox/My Mac (Ryan's
MacBook)/Documents/Papers/LE Trends_COVID/Peer Pop_2021/pop
input/ita_pop_21.xlsx", sheet("Sheet1") firstrow clear

sort year sex nage

merge year sex nage using "/Users/ryan/Documents/Papers/LE
Trends_COVID/STMFinput_3_28_22/italy_1821 deaths.dta"

gen mx = (deaths/pop)*100000

drop _merge

* Mx Rate Ratio b/w 2021 and 2018 and b/w 2020 and 2018 and b/w 2019 and 2018

tempfile a b c d

sort country

save `a'

keep if year == 2018

collapse (mean) mx_18=mx, by(sex nage)

save `b'

use `a', clear

sort sex nage

keep if year == 2019

collapse (mean) mx_19=mx, by(sex nage)

save `c'

merge using `b'

drop _merge

save `c', replace

use `a', clear

sort sex nage

keep if year == 2020

```

```

collapse (mean) mx_20=mx, by(sex nage)

merge using `c'

drop _merge

save `d'

use `a', clear

sort sex nage

keep if year == 2021

merge using `d'

* Estimate RR

gen rr21 = mx/mx_18
gen rr20 = mx_20/mx_18
gen rr19 = mx_19/mx_18

save "/Users/ryan/Desktop/Dropbox_sync/Dropbox/My Mac (Ryan's
MacBook)/Documents/Papers/LE Trends_COVID/HMDB
data/peer_STMF/2021_2020_2019_2018 rate ratios_original source
data/italy_18.dta", replace

*****
* Netherlands *
*****
import excel "/Users/ryan/Desktop/Dropbox_sync/Dropbox/My Mac (Ryan's
MacBook)/Documents/Papers/LE Trends_COVID/Peer Pop_2021/pop
input/nld_pop_21.xlsx", sheet("Sheet1") firstrow clear

sort year sex nage

merge year sex nage using "/Users/ryan/Documents/Papers/LE
Trends_COVID/STMFinput_3_28_22/netherlands_1921 deaths.dta"

gen mx = (deaths/pop)*100000

drop _merge

* Mx Rate Ratio b/w 2020 and 2019 and b/w 2021 and 2019

tempfile a b c d

sort country

save `a'

keep if year == 2019

```

```

collapse (mean) mx_19=mx, by(sex nage)

save `b'

use `a', clear

sort sex nage

keep if year == 2020

collapse (mean) mx_20=mx, by(sex nage)

save `c'

merge using `b'

drop _merge

save `c', replace

use `a', clear

sort sex nage

keep if year == 2021

sort sex nage

save `d'

merge using `c'

drop _merge

* Estimate RR

gen rr21 = mx/mx_19
gen rr20 = mx_20/mx_19

save "/Users/ryan/Desktop/Dropbox_sync/Dropbox/My Mac (Ryan's
MacBook)/Documents/Papers/LE Trends_COVID/HMDB
data/peer_STMF/2021_2020_2019_2018 rate ratios_original source
data/netherlands_19.dta", replace

*****
* New Zealand: Use STMF Rates *
*****

*****
*** Norway ***
*****

```

```

import excel "/Users/ryan/Desktop/Dropbox_sync/Dropbox/My Mac (Ryan's
MacBook)/Documents/Papers/LE Trends_COVID/Peer Pop_2021/pop
input/nor_pop_21.xlsx", sheet("Sheet1") firstrow clear

sort year sex nage

merge year sex nage using "/Users/ryan/Documents/Papers/LE
Trends_COVID/STMFinput_3_28_22/norway_2021 deaths.dta"

gen mx = (deaths/pop)*100000

drop _merge

* Mx Rate Ratio b/w 2021 and 2020

tempfile a b c

sort country

save `a'

keep if year == 2020

collapse (mean) mx_20=mx, by(sex nage)

save `b'

use `a', clear

sort sex nage

keep if year == 2021

sort sex nage

save `c'

merge using `b'

drop _merge

* Estimate RR

gen rr21 = mx/mx_20

save "/Users/ryan/Desktop/Dropbox_sync/Dropbox/My Mac (Ryan's
MacBook)/Documents/Papers/LE Trends_COVID/HMDB
data/peer_STMF/2021_2020_2019_2018 rate ratios_original source
data/norway_20.dta", replace

*****
*** Portugal ***
*****

```



```

import excel "/Users/ryan/Desktop/Dropbox_sync/Dropbox/My Mac (Ryan's
MacBook)/Documents/Papers/LE Trends_COVID/Peer Pop_2021/pop
input/por_pop_21.xlsx", sheet("Sheet1") firstrow clear

sort year sex nage

merge year sex nage using "/Users/ryan/Documents/Papers/LE
Trends_COVID/STMFinput_3_28_22/portugal_2021 deaths.dta"

gen mx = (deaths/pop)*100000

drop _merge

* Mx Rate Ratio b/w 2021 and 2020

tempfile a b c

sort country

save `a'

keep if year == 2020

collapse (mean) mx_20=mx, by(sex nage)

save `b'

use `a', clear

sort sex nage

keep if year == 2021

sort sex nage

save `c'

merge using `b'

drop _merge

* Estimate RR

gen rr21 = mx/mx_20

save "/Users/ryan/Desktop/Dropbox_sync/Dropbox/My Mac (Ryan's
MacBook)/Documents/Papers/LE Trends_COVID/HMDB
data/peer_STMF/2021_2020_2019_2018 rate ratios_original source
data/portugal_20.dta", replace

*****
*** Spain ***
*****

```

```

import excel "/Users/ryan/Desktop/Dropbox_sync/Dropbox/My Mac (Ryan's
MacBook)/Documents/Papers/LE Trends_COVID/Peer Pop_2021/pop
input/esp_pop_21.xlsx", sheet("Sheet1") firstrow clear

sort year sex nage

merge year sex nage using "/Users/ryan/Documents/Papers/LE
Trends_COVID/STMFinput_3_28_22/spain_2021 deaths.dta"

gen mx = (deaths/pop)*100000

drop _merge

* Mx Rate Ratio b/w 2021 and 2020

tempfile a b c

sort country

save `a'

keep if year == 2020

collapse (mean) mx_20=mx, by(sex nage)

save `b'

use `a', clear

sort sex nage

keep if year == 2021

sort sex nage

save `c'

merge using `b'

drop _merge

* Estimate RR

gen rr21 = mx/mx_20

save "/Users/ryan/Desktop/Dropbox_sync/Dropbox/My Mac (Ryan's
MacBook)/Documents/Papers/LE Trends_COVID/HMDB
data/peer_STMF/2021_2020_2019_2018 rate ratios_original source
data/spain_20.dta", replace

*****
*** Sweden ***
*****

```

```

import excel "/Users/ryan/Desktop/Dropbox_sync/Dropbox/My Mac (Ryan's
MacBook)/Documents/Papers/LE Trends_COVID/Peer Pop_2021/pop
input/swe_pop_21.xlsx", sheet("Sheet1") firstrow clear

sort year sex nage

merge year sex nage using "/Users/ryan/Documents/Papers/LE
Trends_COVID/STMFinput_3_28_22/sweden_2021 deaths.dta"

gen mx = (deaths/pop)*100000

drop _merge

* Mx Rate Ratio b/w 2021 and 2020

tempfile a b c

sort country

save `a'

keep if year == 2020

collapse (mean) mx_20=mx, by(sex nage)

save `b'

use `a', clear

sort sex nage

keep if year == 2021

sort sex nage

save `c'

merge using `b'

drop _merge

* Estimate RR

gen rr21 = mx/mx_20

save "/Users/ryan/Desktop/Dropbox_sync/Dropbox/My Mac (Ryan's
MacBook)/Documents/Papers/LE Trends_COVID/HMDB
data/peer_STMF/2021_2020_2019_2018_rate_ratios_original source
data/sweden_20.dta", replace

*****
*** Switzerland ***
*****

```

```

import excel "/Users/ryan/Desktop/Dropbox_sync/Dropbox/My Mac (Ryan's
MacBook)/Documents/Papers/LE Trends_COVID/Peer Pop_2021/pop
input/che_pop_21.xlsx", sheet("Sheet1") firstrow clear

sort year sex nage

merge year sex nage using "/Users/ryan/Documents/Papers/LE
Trends_COVID/STMFinput_3_28_22/switzerland_2021 deaths.dta"

gen mx = (deaths/pop)*100000

drop _merge

* Mx Rate Ratio b/w 2021 and 2020

tempfile a b c

sort country

save `a'

keep if year == 2020

collapse (mean) mx_20=mx, by(sex nage)

save `b'

use `a', clear

sort sex nage

keep if year == 2021

sort sex nage

save `c'

merge using `b'

drop _merge

* Estimate RR

gen rr21 = mx/mx_20

save "/Users/ryan/Desktop/Dropbox_sync/Dropbox/My Mac (Ryan's
MacBook)/Documents/Papers/LE Trends_COVID/HMDB
data/peer_STMF/2021_2020_2019_2018_rate_ratios_original source
data/switzerland_20.dta", replace

```

```
***** United Kingdom: Northern Ireland, Scotland, England + Wales *****
```

```
*****  
*** Northern Ireland ***  
*****
```

```
*****  
* Merge 18-20 Separately for More Accurate Ages *  
*****
```

```
import excel "/Users/ryan/Desktop/Dropbox_sync/Dropbox/My Mac (Ryan's  
MacBook)/Documents/Papers/LE Trends_COVID/Peer Pop_2021/pop  
input/nir_pop_1820.xlsx", sheet("Sheet1") firstrow clear
```

```
sort year sex nage
```

```
merge year sex nage using "/Users/ryan/Documents/Papers/LE  
Trends_COVID/STMFinput_3_28_22/northern ireland_1820 deaths.dta"
```

```
gen mx = (deaths/pop)*100000
```

```
drop _merge F G
```

```
* Mx Rate Ratio b/w 2020 and 2018 and b/w 2019 and 2018
```

```
tempfile a b c
```

```
sort country
```

```
save `a'
```

```
keep if year == 2018
```

```
collapse (mean) mx_18=mx, by(sex nage)
```

```
save `b'
```

```
use `a', clear
```

```
sort sex nage
```

```
keep if year == 2019
```

```
collapse (mean) mx_19=mx, by(sex nage)
```

```
save `c'
```

```
merge using `b'
```

```
drop _merge
```

```
save `c', replace
```

```
use `a', clear
```

```

sort sex nage

keep if year == 2020

merge using `c'

* Estimate RR

gen rr20 = mx/mx_18
gen rr19 = mx_19/mx_18

replace rr20 = 1 if rr20 == 0

save "/Users/ryan/Desktop/Dropbox_sync/Dropbox/My Mac (Ryan's
MacBook)/Documents/Papers/LE Trends_COVID/HMDB
data/peer_STMF/2021_2020_2019_2018 rate ratios_original source data/northern
ireland_1820.dta", replace

*****
* Merge 18-21 Separately for More Accurate Ages *
*****

import excel "/Users/ryan/Desktop/Dropbox_sync/Dropbox/My Mac (Ryan's
MacBook)/Documents/Papers/LE Trends_COVID/Peer Pop_2021/pop
input/nir_pop_21.xlsx", sheet("Sheet1") firstrow clear

sort year sex nage

merge year sex nage using "/Users/ryan/Documents/Papers/LE
Trends_COVID/STMFinput_3_28_22/northern ireland_1821 deaths.dta"

gen mx = (deaths/pop)*100000

drop F G
drop if _merge != 3
drop _merge

* Mx Rate Ratio b/w 2021 and 2018

tempfile a b c

sort country

save `a'

keep if year == 2018

collapse (mean) mx_18=mx, by(sex nage)

save `b'

```

```

use `a', clear

sort sex nage

keep if year == 2021

sort sex nage

save `c'

merge using `b'

drop _merge

* Estimate RR

gen rr21 = mx/mx_18

save "/Users/ryan/Desktop/Dropbox_sync/Dropbox/My Mac (Ryan's
MacBook)/Documents/Papers/LE Trends_COVID/HMDB
data/peer_STMF/2021_2020_2019_2018 rate ratios_original source data/northern
ireland_1821.dta", replace

*****
*** Scotland ***
*****

import excel "/Users/ryan/Desktop/Dropbox_sync/Dropbox/My Mac (Ryan's
MacBook)/Documents/Papers/LE Trends_COVID/Peer Pop_2021/pop
input/scot_pop_21.xlsx", sheet("Sheet1") firstrow clear

drop F G

sort year sex nage

merge year sex nage using "/Users/ryan/Documents/Papers/LE
Trends_COVID/STMFinput_3_28_22/scotland_1821 deaths.dta"

gen mx = (deaths/pop)*100000

drop _merge

* Mx Rate Ratio b/w 2021 and 2018 and b/w 2020 and 2018 and b/w 2019 and 2018

tempfile a b c d

sort country

save `a'

keep if year == 2018

collapse (mean) mx_18=mx, by(sex nage)

```

```

save `b'

use `a', clear

sort sex nage

keep if year == 2019

collapse (mean) mx_19=mx, by(sex nage)

save `c'

merge using `b'

drop _merge

save `c', replace

use `a', clear

sort sex nage

keep if year == 2020

collapse (mean) mx_20=mx, by(sex nage)

merge using `c'

drop _merge

save `d'

use `a', clear

sort sex nage

keep if year == 2021

merge using `d'

* Estimate RR

gen rr21 = mx/mx_18
gen rr20 = mx_20/mx_18
gen rr19 = mx_19/mx_18

save "/Users/ryan/Desktop/Dropbox_sync/Dropbox/My Mac (Ryan's
MacBook)/Documents/Papers/LE Trends_COVID/HMDB
data/peer_STMF/2021_2020_2019_2018_rate_ratios_original source
data/scotland_18.dta", replace

```



```

*****
*** England & Wales ***
*****

import excel "/Users/ryan/Desktop/Dropbox_sync/Dropbox/My Mac (Ryan's
MacBook)/Documents/Papers/LE Trends_COVID/Peer Pop_2021/pop
input/eng_w_pop_21.xlsx", sheet("Sheet1") firstrow clear

sort year sex nage

merge year sex nage using "/Users/ryan/Documents/Papers/LE
Trends_COVID/STMFinput_3_28_22/england_wales_1821_deaths.dta"

gen mx = (deaths/pop)*100000

drop _merge

* Mx Rate Ratio b/w 2021 and 2018 and b/w 2020 and 2018 and b/w 2019 and 2018

tempfile a b c d

sort country

save `a'

keep if year == 2018

collapse (mean) mx_18=mx, by(sex nage)

save `b'

use `a', clear

sort sex nage

keep if year == 2019

collapse (mean) mx_19=mx, by(sex nage)

save `c'

merge using `b'

drop _merge

save `c', replace

use `a', clear

sort sex nage

keep if year == 2020

collapse (mean) mx_20=mx, by(sex nage)

```

```
merge using `c'

drop _merge

save `d'

use `a', clear

sort sex nage

keep if year == 2021

merge using `d'

* Estimate RR

gen rr21 = mx/mx_18
gen rr20 = mx_20/mx_18
gen rr19 = mx_19/mx_18

save "/Users/ryan/Desktop/Dropbox_sync/Dropbox/My Mac (Ryan's
MacBook)/Documents/Papers/LE Trends_COVID/HMDB
data/peer_STMF/2021_2020_2019_2018_rate_ratios_original source
data/england_wales_18.dta", replace
```

## Import NCHS U.S. Death Counts, 2018-2020, and Merge with Census Population Estimates

```
***** Load 2018, 2019, 2020 Restricted-Access NCHS Mortality Files *****
***** Collapse into 0, 1-4, 5-9, ..., 80-84, 85+ Age Groups by sex and
race/eth *****
***** Merge with CDC Wonder Population Counts: NCHS Abridged-Race, 1990-2020
*****
```

```
* 2005+ Documentation

* FIPS State (Res)          33-34
* FIPS County (Res)       35-37
* Hispanic Origin 488
*   Hisp 1-5
* Race                    450
*   w      1
*   b      2
*   AIAN   3
*   Asian 4-5
* Sex                     69
* Age (leads with 0)     70-71
```

```
* Underlying COD
* ICD-10                 146-149
* 113                    154-156
```

```
*****
* Loading Data *
*****
```

```
cd "E:\Data\20211209.Masters\Ryan Masters_12-9-2021\MortAC2018"
```

```
*****
*   2018   *
* Sex, Race *
*****
```

```
infix str state 33-34 ra 450 mra 489-490 hisp 488 str sex 69 age 75-76 str
cod_icd10 146-149 cod113 154-156 countcond 341-342 str cond1 344-348 str
cond2 349-353 str cond3 354-358 str cond4 359-363 str cond5 364-368 using
"Mort2018US.AllCnty.txt", clear
```

```
compress
```

```
des
```

```
* gen mort
```

```
gen mort = 1
```

```
* drop foreign residents
```

```
drop if state == "YY"
drop if state == "ZZ"
drop if state == "VI"
drop if state == "PR"
```

```

drop if state == "MX"
drop if state == "GU"
drop if state == "CU"
drop if state == "AS"
drop if state == "CC"

gen female = 0
replace female = 1 if sex == "F"

* race/ethnicity
* 1=Hispanic
* 2=NH Black
* 3=NH white
* 4=NH AIAN
* 5=NH Asian/NH/PI

gen hispanic = .
replace hispanic = 1 if hisp >=1 & hisp <=5
replace hispanic = 0 if hisp >= 6 & hisp <= 8

gen race = .
replace race = 1 if hispanic == 1
replace race = 2 if hispanic == 0 & ra == 2
replace race = 3 if hispanic == 0 & ra == 1
replace race = 4 if hispanic == 0 & ra == 3
replace race = 5 if hispanic == 0 & ra == 4
replace race = 5 if hispanic == 0 & ra == 5

tab race hisp

gen agecat = .
replace agecat = 0 if age >= 1 & age <= 22
replace agecat = 1 if age >= 23 & age <= 26
replace agecat = 5 if age == 27
replace agecat = 10 if age == 28
replace agecat = 15 if age == 29
replace agecat = 20 if age == 30
replace agecat = 25 if age == 31
replace agecat = 30 if age == 32
replace agecat = 35 if age == 33
replace agecat = 40 if age == 34
replace agecat = 45 if age == 35
replace agecat = 50 if age == 36
replace agecat = 55 if age == 37
replace agecat = 60 if age == 38
replace agecat = 65 if age == 39
replace agecat = 70 if age == 40
replace agecat = 75 if age == 41
replace agecat = 80 if age == 42
replace agecat = 85 if age >= 43 & age <=51

* Collapse Death Counts - by Sex, Race, Age Category

sort female race agecat

collapse (sum) death=mort, by(female race agecat)

```

```

rename agecat age
drop if race == .
drop if age == .

* Save 2018 Death Counts - By Sex, Race/Ethnicity, Age

gen year = 2018

sort year female race age

save "E:\Data\covid2020\nation\death_sex_race_2018.dta", replace

*****
* 2018 *
* Race *
*****

infix str state 33-34 ra 450 mra 489-490 hisp 488 str sex 69 age 75-76 str
cod_icd10 146-149 cod113 154-156 countcond 341-342 str cond1 344-348 str
cond2 349-353 str cond3 354-358 str cond4 359-363 str cond5 364-368 using
"Mort2018US.AllCnty.txt", clear

compress

des

* gen mort

gen mort = 1

* drop foreign residents

drop if state == "YY"
drop if state == "ZZ"
drop if state == "VI"
drop if state == "PR"
drop if state == "MX"
drop if state == "GU"
drop if state == "CU"
drop if state == "AS"
drop if state == "CC"

gen female = 0
replace female = 1 if sex == "F"

* race/ethnicity
* 1=Hispanic
* 2=NH Black
* 3=NH white
* 4=NH AIAN
* 5=NH Asian/NH/PI

gen hispanic = .
replace hispanic = 1 if hisp >=1 & hisp <=5

```

```

replace hispanic = 0 if hisp >= 6 & hisp <= 8

gen race = .
replace race = 1 if hispanic == 1
replace race = 2 if hispanic == 0 & ra == 2
replace race = 3 if hispanic == 0 & ra == 1
replace race = 4 if hispanic == 0 & ra == 3
replace race = 5 if hispanic == 0 & ra == 4
replace race = 5 if hispanic == 0 & ra == 5

tab race hisp

gen agecat = .
replace agecat = 0 if age >= 1 & age <= 22
replace agecat = 1 if age >= 23 & age <= 26
replace agecat = 5 if age == 27
replace agecat = 10 if age == 28
replace agecat = 15 if age == 29
replace agecat = 20 if age == 30
replace agecat = 25 if age == 31
replace agecat = 30 if age == 32
replace agecat = 35 if age == 33
replace agecat = 40 if age == 34
replace agecat = 45 if age == 35
replace agecat = 50 if age == 36
replace agecat = 55 if age == 37
replace agecat = 60 if age == 38
replace agecat = 65 if age == 39
replace agecat = 70 if age == 40
replace agecat = 75 if age == 41
replace agecat = 80 if age == 42
replace agecat = 85 if age >= 43 & age <=51

* Collapse Death Counts - by Race, Age Category

sort race agecat

collapse (sum) death=mort, by(race agecat)

rename agecat age
drop if race == .
drop if age == .

* Save 2018 Death Counts - By Race/Ethnicity, Age

gen year = 2018

sort year race age

save "E:\Data\covid2020\nation\death_race_2018.dta", replace

*****
* 2018 *
* Sex *
*****

```

```

infix str state 33-34 ra 450 mra 489-490 hisp 488 str sex 69 age 75-76 str
cod_icd10 146-149 cod113 154-156 countcond 341-342 str cond1 344-348 str
cond2 349-353 str cond3 354-358 str cond4 359-363 str cond5 364-368 using
"Mort2018US.AllCnty.txt", clear

compress

des

* gen mort

gen mort = 1

* drop foreign residents

drop if state == "YY"
drop if state == "ZZ"
drop if state == "VI"
drop if state == "PR"
drop if state == "MX"
drop if state == "GU"
drop if state == "CU"
drop if state == "AS"
drop if state == "CC"

gen female = 0
replace female = 1 if sex == "F"

gen agecat = .
replace agecat = 0 if age >= 1 & age <= 22
replace agecat = 1 if age >= 23 & age <= 26
replace agecat = 5 if age == 27
replace agecat = 10 if age == 28
replace agecat = 15 if age == 29
replace agecat = 20 if age == 30
replace agecat = 25 if age == 31
replace agecat = 30 if age == 32
replace agecat = 35 if age == 33
replace agecat = 40 if age == 34
replace agecat = 45 if age == 35
replace agecat = 50 if age == 36
replace agecat = 55 if age == 37
replace agecat = 60 if age == 38
replace agecat = 65 if age == 39
replace agecat = 70 if age == 40
replace agecat = 75 if age == 41
replace agecat = 80 if age == 42
replace agecat = 85 if age >= 43 & age <=51

* Collapse Death Counts - by Sex, Age Category

sort female agecat

collapse (sum) death=mort, by(female agecat)

```

```

rename agecat age
drop if age == .

* Save 2018 Death Counts - By Sex, Age

gen year = 2018

sort year female age

save "E:\Data\covid2020\nation\death_sex_2018.dta", replace

*****
* 2018 *
* Total *
*****

infix str state 33-34 ra 450 mra 489-490 hisp 488 str sex 69 age 75-76 str
cod_icd10 146-149 cod113 154-156 countcond 341-342 str cond1 344-348 str
cond2 349-353 str cond3 354-358 str cond4 359-363 str cond5 364-368 using
"Mort2018US.AllCnty.txt", clear

compress

des

* gen mort

gen mort = 1

* drop foreign residents

drop if state == "YY"
drop if state == "ZZ"
drop if state == "VI"
drop if state == "PR"
drop if state == "MX"
drop if state == "GU"
drop if state == "CU"
drop if state == "AS"
drop if state == "CC"

gen agecat = .
replace agecat = 0 if age >= 1 & age <= 22
replace agecat = 1 if age >= 23 & age <= 26
replace agecat = 5 if age == 27
replace agecat = 10 if age == 28
replace agecat = 15 if age == 29
replace agecat = 20 if age == 30
replace agecat = 25 if age == 31
replace agecat = 30 if age == 32
replace agecat = 35 if age == 33
replace agecat = 40 if age == 34
replace agecat = 45 if age == 35
replace agecat = 50 if age == 36

```



```

replace agecat = 55 if age == 37
replace agecat = 60 if age == 38
replace agecat = 65 if age == 39
replace agecat = 70 if age == 40
replace agecat = 75 if age == 41
replace agecat = 80 if age == 42
replace agecat = 85 if age >= 43 & age <=51

* Collapse Death Counts - by Age Category

sort agecat

collapse (sum) death=mort, by(agecat)

rename agecat age
drop if age == .

* Save 2018 Death Counts - By Age

gen year = 2018

sort age

save "E:\Data\covid2020\nation\death_2018.dta", replace

cd "E:\Data\20211209.Masters\Ryan Masters_12-9-2021\MortAC2019"

*****
*   2019   *
* Sex, Race *
*****

infix str state 33-34 ra 450 mra 489-490 hisp 488 str sex 69 age 75-76 str
cod_icd10 146-149 cod113 154-156 countcond 341-342 str cond1 344-348 str
cond2 349-353 str cond3 354-358 str cond4 359-363 str cond5 364-368 using
"MULT2019US.AllCnty.txt", clear

compress

des

* gen mort

gen mort = 1

* drop foreign residents

drop if state == "YY"
drop if state == "ZZ"
drop if state == "VI"
drop if state == "PR"
drop if state == "MX"
drop if state == "GU"
drop if state == "CU"
drop if state == "AS"

```

```

drop if state == "CC"

gen female = 0
replace female = 1 if sex == "F"

* race/ethnicity
* 1=Hispanic
* 2=NH Black
* 3=NH white
* 4=NH AIAN
* 5=NH Asian/NH/PI

gen hispanic = .
replace hispanic = 1 if hisp >=1 & hisp <=5
replace hispanic = 0 if hisp >= 6 & hisp <= 8

gen race = .
replace race = 1 if hispanic == 1
replace race = 2 if hispanic == 0 & ra == 2
replace race = 3 if hispanic == 0 & ra == 1
replace race = 4 if hispanic == 0 & ra == 3
replace race = 5 if hispanic == 0 & ra == 4
replace race = 5 if hispanic == 0 & ra == 5

tab race hisp

gen agecat = .
replace agecat = 0 if age >= 1 & age <= 22
replace agecat = 1 if age >= 23 & age <= 26
replace agecat = 5 if age == 27
replace agecat = 10 if age == 28
replace agecat = 15 if age == 29
replace agecat = 20 if age == 30
replace agecat = 25 if age == 31
replace agecat = 30 if age == 32
replace agecat = 35 if age == 33
replace agecat = 40 if age == 34
replace agecat = 45 if age == 35
replace agecat = 50 if age == 36
replace agecat = 55 if age == 37
replace agecat = 60 if age == 38
replace agecat = 65 if age == 39
replace agecat = 70 if age == 40
replace agecat = 75 if age == 41
replace agecat = 80 if age == 42
replace agecat = 85 if age >= 43 & age <=51

* Collapse Death Counts - by Sex, Race, Age Category

sort female race agecat

collapse (sum) death=mort, by(female race agecat)

rename agecat age
drop if race == .
drop if age == .

```

```

* Save 2019 Death Counts - By Sex, Race/Ethnicity, Age

gen year = 2019

sort year female race age

save "E:\Data\covid2020\nation\death_sex_race_2019.dta", replace

*****
* 2019 *
* Race *
*****

infix str state 33-34 ra 450 mra 489-490 hisp 488 str sex 69 age 75-76 str
cod_icd10 146-149 cod113 154-156 countcond 341-342 str cond1 344-348 str
cond2 349-353 str cond3 354-358 str cond4 359-363 str cond5 364-368 using
"MULT2019US.AllCnty.txt", clear

compress

des

* gen mort

gen mort = 1

* drop foreign residents

drop if state == "YY"
drop if state == "ZZ"
drop if state == "VI"
drop if state == "PR"
drop if state == "MX"
drop if state == "GU"
drop if state == "CU"
drop if state == "AS"
drop if state == "CC"

gen female = 0
replace female = 1 if sex == "F"

* race/ethnicity
* 1=Hispanic
* 2=NH Black
* 3=NH white
* 4=NH AIAN
* 5=NH Asian/NH/PI

gen hispanic = .
replace hispanic = 1 if hisp >=1 & hisp <=5
replace hispanic = 0 if hisp >= 6 & hisp <= 8

gen race = .
replace race = 1 if hispanic == 1

```

```

replace race = 2 if hispanic == 0 & ra == 2
replace race = 3 if hispanic == 0 & ra == 1
replace race = 4 if hispanic == 0 & ra == 3
replace race = 5 if hispanic == 0 & ra == 4
replace race = 5 if hispanic == 0 & ra == 5

tab race hisp

gen agecat = .
replace agecat = 0 if age >= 1 & age <= 22
replace agecat = 1 if age >= 23 & age <= 26
replace agecat = 5 if age == 27
replace agecat = 10 if age == 28
replace agecat = 15 if age == 29
replace agecat = 20 if age == 30
replace agecat = 25 if age == 31
replace agecat = 30 if age == 32
replace agecat = 35 if age == 33
replace agecat = 40 if age == 34
replace agecat = 45 if age == 35
replace agecat = 50 if age == 36
replace agecat = 55 if age == 37
replace agecat = 60 if age == 38
replace agecat = 65 if age == 39
replace agecat = 70 if age == 40
replace agecat = 75 if age == 41
replace agecat = 80 if age == 42
replace agecat = 85 if age >= 43 & age <=51

* Collapse Death Counts - by Race, Age Category

sort race agecat

collapse (sum) death=mort, by(race agecat)

rename agecat age
drop if race == .
drop if age == .

* Save 2019 Death Counts - By Race/Ethnicity, Age

gen year = 2019

sort year race age

save "E:\Data\covid2020\nation\death_race_2019.dta", replace

*****
* 2019 *
* Sex *
*****

infix str state 33-34 ra 450 mra 489-490 hisp 488 str sex 69 age 75-76 str
cod_icd10 146-149 cod113 154-156 countcond 341-342 str cond1 344-348 str

```

```
cond2 349-353 str cond3 354-358 str cond4 359-363 str cond5 364-368 using  
"MULT2019US.AllCnty.txt", clear
```

```
compress
```

```
des
```

```
* gen mort
```

```
gen mort = 1
```

```
* drop foreign residents
```

```
drop if state == "YY"
```

```
drop if state == "ZZ"
```

```
drop if state == "VI"
```

```
drop if state == "PR"
```

```
drop if state == "MX"
```

```
drop if state == "GU"
```

```
drop if state == "CU"
```

```
drop if state == "AS"
```

```
drop if state == "CC"
```

```
gen female = 0
```

```
replace female = 1 if sex == "F"
```

```
gen agecat = .
```

```
replace agecat = 0 if age >= 1 & age <= 22
```

```
replace agecat = 1 if age >= 23 & age <= 26
```

```
replace agecat = 5 if age == 27
```

```
replace agecat = 10 if age == 28
```

```
replace agecat = 15 if age == 29
```

```
replace agecat = 20 if age == 30
```

```
replace agecat = 25 if age == 31
```

```
replace agecat = 30 if age == 32
```

```
replace agecat = 35 if age == 33
```

```
replace agecat = 40 if age == 34
```

```
replace agecat = 45 if age == 35
```

```
replace agecat = 50 if age == 36
```

```
replace agecat = 55 if age == 37
```

```
replace agecat = 60 if age == 38
```

```
replace agecat = 65 if age == 39
```

```
replace agecat = 70 if age == 40
```

```
replace agecat = 75 if age == 41
```

```
replace agecat = 80 if age == 42
```

```
replace agecat = 85 if age >= 43 & age <=51
```

```
* Collapse Death Counts - by Sex, Age Category
```

```
sort sex agecat
```

```
collapse (sum) death=mort, by(female agecat)
```

```
rename agecat age
```

```
drop if age == .
```

```

* Save 2019 Death Counts - By Sex, Age

gen year = 2019

sort year female age

save "E:\Data\covid2020\nation\death_sex_2019.dta", replace

*****
* 2019 *
* Total *
*****

infix str state 33-34 ra 450 mra 489-490 hisp 488 str sex 69 age 75-76 str
cod_icd10 146-149 cod113 154-156 countcond 341-342 str cond1 344-348 str
cond2 349-353 str cond3 354-358 str cond4 359-363 str cond5 364-368 using
"MULT2019US.AllCnty.txt", clear

compress

des

* gen mort

gen mort = 1

* drop foreign residents

drop if state == "YY"
drop if state == "ZZ"
drop if state == "VI"
drop if state == "PR"
drop if state == "MX"
drop if state == "GU"
drop if state == "CU"
drop if state == "AS"
drop if state == "CC"

gen agecat = .
replace agecat = 0 if age >= 1 & age <= 22
replace agecat = 1 if age >= 23 & age <= 26
replace agecat = 5 if age == 27
replace agecat = 10 if age == 28
replace agecat = 15 if age == 29
replace agecat = 20 if age == 30
replace agecat = 25 if age == 31
replace agecat = 30 if age == 32
replace agecat = 35 if age == 33
replace agecat = 40 if age == 34
replace agecat = 45 if age == 35
replace agecat = 50 if age == 36
replace agecat = 55 if age == 37
replace agecat = 60 if age == 38
replace agecat = 65 if age == 39

```

```

replace agecat = 70 if age == 40
replace agecat = 75 if age == 41
replace agecat = 80 if age == 42
replace agecat = 85 if age >= 43 & age <=51

* Collapse Death Counts - by Age Category

sort agecat

collapse (sum) death=mort, by(agecat)

rename agecat age
drop if age == .

* Save 2019 Death Counts - By Age

gen year = 2019

sort year age

save "E:\Data\covid2020\nation\death_2019.dta", replace

cd "E:\Data\20211209.Masters\Ryan Masters_12-9-2021\MULT2020.LimGeo"

*****
*   2020   *
* Sex, Race *
*****

infix str state 33-34 ra 450 mra 489-490 hisp 488 str sex 69 age 75-76 str
cod_icd10 146-149 cod113 154-156 countcond 341-342 str cond1 344-348 str
cond2 349-353 str cond3 354-358 str cond4 359-363 str cond5 364-368 using
"Mort2020US.LimGeo.txt", clear

compress

des

* gen mort

gen mort = 1

* drop foreign residents

drop if state == "YY"
drop if state == "ZZ"
drop if state == "VI"
drop if state == "PR"
drop if state == "MX"
drop if state == "GU"
drop if state == "CU"
drop if state == "AS"
drop if state == "CC"

```

```

gen female = 0
replace female = 1 if sex == "F"

* race/ethnicity
* 1=Hispanic
* 2=NH Black
* 3=NH white
* 4=NH AIAN
* 5=NH Asian/NH/PI

gen hispanic = .
replace hispanic = 1 if hisp >=1 & hisp <=5
replace hispanic = 0 if hisp >= 6 & hisp <= 8

gen race = .
replace race = 1 if hispanic == 1
replace race = 2 if hispanic == 0 & ra == 2
replace race = 3 if hispanic == 0 & ra == 1
replace race = 4 if hispanic == 0 & ra == 3
replace race = 5 if hispanic == 0 & ra == 4
replace race = 5 if hispanic == 0 & ra == 5

tab race hisp

gen agecat = .
replace agecat = 0 if age >= 1 & age <= 22
replace agecat = 1 if age >= 23 & age <= 26
replace agecat = 5 if age == 27
replace agecat = 10 if age == 28
replace agecat = 15 if age == 29
replace agecat = 20 if age == 30
replace agecat = 25 if age == 31
replace agecat = 30 if age == 32
replace agecat = 35 if age == 33
replace agecat = 40 if age == 34
replace agecat = 45 if age == 35
replace agecat = 50 if age == 36
replace agecat = 55 if age == 37
replace agecat = 60 if age == 38
replace agecat = 65 if age == 39
replace agecat = 70 if age == 40
replace agecat = 75 if age == 41
replace agecat = 80 if age == 42
replace agecat = 85 if age >= 43 & age <=51

* Collapse Death Counts - by Sex, Race, Age Category

sort female race agecat

collapse (sum) death=mort, by(female race agecat)

rename agecat age
drop if race == .
drop if age == .

```



```

* Save 2020 Death Counts - By Sex, Race/Ethnicity, Age

gen year = 2020

sort year female race age

save "E:\Data\covid2020\nation\death_sex_race_2020.dta", replace

*****
* 2020 *
* Race *
*****

infix str state 33-34 ra 450 mra 489-490 hisp 488 str sex 69 age 75-76 str
cod_icd10 146-149 cod113 154-156 countcond 341-342 str cond1 344-348 str
cond2 349-353 str cond3 354-358 str cond4 359-363 str cond5 364-368 using
"Mort2020US.LimGeo.txt", clear

compress

des

* gen mort

gen mort = 1

* drop foreign residents

drop if state == "YY"
drop if state == "ZZ"
drop if state == "VI"
drop if state == "PR"
drop if state == "MX"
drop if state == "GU"
drop if state == "CU"
drop if state == "AS"
drop if state == "CC"

gen female = 0
replace female = 1 if sex == "F"

* race/ethnicity
* 1=Hispanic
* 2=NH Black
* 3=NH white
* 4=NH AIAN
* 5=NH Asian/NH/PI

gen hispanic = .
replace hispanic = 1 if hisp >=1 & hisp <=5
replace hispanic = 0 if hisp >= 6 & hisp <= 8

gen race = .
replace race = 1 if hispanic == 1
replace race = 2 if hispanic == 0 & ra == 2

```

```

replace race = 3 if hispanic == 0 & ra == 1
replace race = 4 if hispanic == 0 & ra == 3
replace race = 5 if hispanic == 0 & ra == 4
replace race = 5 if hispanic == 0 & ra == 5

tab race hisp

gen agecat = .
replace agecat = 0 if age >= 1 & age <= 22
replace agecat = 1 if age >= 23 & age <= 26
replace agecat = 5 if age == 27
replace agecat = 10 if age == 28
replace agecat = 15 if age == 29
replace agecat = 20 if age == 30
replace agecat = 25 if age == 31
replace agecat = 30 if age == 32
replace agecat = 35 if age == 33
replace agecat = 40 if age == 34
replace agecat = 45 if age == 35
replace agecat = 50 if age == 36
replace agecat = 55 if age == 37
replace agecat = 60 if age == 38
replace agecat = 65 if age == 39
replace agecat = 70 if age == 40
replace agecat = 75 if age == 41
replace agecat = 80 if age == 42
replace agecat = 85 if age >= 43 & age <=51

* Collapse Death Counts - by Race, Age Category

sort race agecat

collapse (sum) death=mort, by(race agecat)

rename agecat age
drop if race == .
drop if age == .

* Save 2020 Death Counts - By Race/Ethnicity, Age

gen year = 2020

sort year race age

save "E:\Data\covid2020\nation\death_race_2020.dta", replace

*****
* 2020 *
* Sex *
*****

infix str state 33-34 ra 450 mra 489-490 hisp 488 str sex 69 age 75-76 str
cod_icd10 146-149 cod113 154-156 countcond 341-342 str cond1 344-348 str
cond2 349-353 str cond3 354-358 str cond4 359-363 str cond5 364-368 using
"Mort2020US.LimGeo.txt", clear

```

```

compress

des

* gen mort

gen mort = 1

* drop foreign residents

drop if state == "YY"
drop if state == "ZZ"
drop if state == "VI"
drop if state == "PR"
drop if state == "MX"
drop if state == "GU"
drop if state == "CU"
drop if state == "AS"
drop if state == "CC"

gen female = 0
replace female = 1 if sex == "F"

gen agecat = .
replace agecat = 0 if age >= 1 & age <= 22
replace agecat = 1 if age >= 23 & age <= 26
replace agecat = 5 if age == 27
replace agecat = 10 if age == 28
replace agecat = 15 if age == 29
replace agecat = 20 if age == 30
replace agecat = 25 if age == 31
replace agecat = 30 if age == 32
replace agecat = 35 if age == 33
replace agecat = 40 if age == 34
replace agecat = 45 if age == 35
replace agecat = 50 if age == 36
replace agecat = 55 if age == 37
replace agecat = 60 if age == 38
replace agecat = 65 if age == 39
replace agecat = 70 if age == 40
replace agecat = 75 if age == 41
replace agecat = 80 if age == 42
replace agecat = 85 if age >= 43 & age <=51

* Collapse Death Counts - by Sex, Age Category

sort sex agecat

collapse (sum) death=mort, by(female agecat)

rename agecat age
drop if age == .

* Save 2020 Death Counts - By Sex, Age

```

```

gen year = 2020

sort year female age

save "E:\Data\covid2020\nation\death_sex_2020.dta", replace

*****
* 2020 *
* Total *
*****

infix str state 33-34 ra 450 mra 489-490 hisp 488 str sex 69 age 75-76 str
cod_icd10 146-149 cod113 154-156 countcond 341-342 str cond1 344-348 str
cond2 349-353 str cond3 354-358 str cond4 359-363 str cond5 364-368 using
"Mort2020US.LimGeo.txt", clear

compress

des

* gen mort

gen mort = 1

* drop foreign residents

drop if state == "YY"
drop if state == "ZZ"
drop if state == "VI"
drop if state == "PR"
drop if state == "MX"
drop if state == "GU"
drop if state == "CU"
drop if state == "AS"
drop if state == "CC"

gen agecat = .
replace agecat = 0 if age >= 1 & age <= 22
replace agecat = 1 if age >= 23 & age <= 26
replace agecat = 5 if age == 27
replace agecat = 10 if age == 28
replace agecat = 15 if age == 29
replace agecat = 20 if age == 30
replace agecat = 25 if age == 31
replace agecat = 30 if age == 32
replace agecat = 35 if age == 33
replace agecat = 40 if age == 34
replace agecat = 45 if age == 35
replace agecat = 50 if age == 36
replace agecat = 55 if age == 37
replace agecat = 60 if age == 38
replace agecat = 65 if age == 39
replace agecat = 70 if age == 40
replace agecat = 75 if age == 41
replace agecat = 80 if age == 42

```

```

replace agecat = 85 if age >= 43 & age <=51

* Collapse Death Counts - by Age Category

sort agecat

collapse (sum) death=mort, by(agecat)

rename agecat age
drop if age == .

* Save 2020 Death Counts - By Age

gen year = 2020

sort year age

save "E:\Data\covid2020\nation\death_2020.dta", replace

*****
* Import Population Counts from Excel *
*****

import excel "E:\Data\CDC Pop\nationpop_18_19_20.xlsx", sheet("total")
firstrow clear

keep age year pop
sort year age

save "E:\Data\CDC Pop\total_pop.dta", replace

import excel "E:\Data\CDC Pop\nationpop_18_19_20.xlsx", sheet("sex") firstrow
clear

keep female age year pop
sort year female age

save "E:\Data\CDC Pop\sex_pop.dta", replace

import excel "E:\Data\CDC Pop\nationpop_18_19_20.xlsx", sheet("race")
firstrow clear

keep race age year pop
sort year race age

save "E:\Data\CDC Pop\race_pop.dta", replace

import excel "E:\Data\CDC Pop\nationpop_18_19_20.xlsx", sheet("sex_race")
firstrow clear

keep race female age year pop
sort year race female age

```

```

save "E:\Data\CDC Pop\sex_race_pop.dta", replace

*****
*       Append 2018, 2019, 2020       *
* Merge Death Counts with Pop Counts *
*****

use "E:\Data\covid2020\data_nation\death_2019.dta", replace
append using "E:\Data\covid2020\data_nation\death_2018.dta"
append using "E:\Data\covid2020\data_nation\death_2020.dta"

sort year age
save "E:\Data\covid2020\data_nation\total_death.dta", replace

use "E:\Data\covid2020\data_nation\death_sex_2019.dta", replace
append using "E:\Data\covid2020\data_nation\death_sex_2018.dta"
append using "E:\Data\covid2020\data_nation\death_sex_2020.dta"

sort year female age
save "E:\Data\covid2020\data_nation\sex_death.dta", replace

use "E:\Data\covid2020\data_nation\death_race_2019.dta", replace
append using "E:\Data\covid2020\data_nation\death_race_2018.dta"
append using "E:\Data\covid2020\data_nation\death_race_2020.dta"

sort year race age
save "E:\Data\covid2020\data_nation\race_death.dta", replace

use "E:\Data\covid2020\data_nation\death_sex_race_2019.dta", replace
append using "E:\Data\covid2020\data_nation\death_sex_race_2018.dta"
append using "E:\Data\covid2020\data_nation\death_sex_race_2020.dta"

sort year race female age
save "E:\Data\covid2020\data_nation\sex_race_death.dta", replace

* Merge Death + Pop

use "E:\Data\covid2020\data_nation\sex_race_death.dta", replace
merge year race female age using "E:\Data\CDC Pop\sex_race_pop.dta"

gen mx = (death/pop)*100000

save "E:\Data\covid2020\data_nation\sex_race_mx.dta", replace

use "E:\Data\covid2020\data_nation\sex_death.dta", replace
merge year female age using "E:\Data\CDC Pop\sex_pop.dta"

gen mx = (death/pop)*100000

save "E:\Data\covid2020\data_nation\sex_mx.dta", replace

```

```
use "E:\Data\covid2020\data_nation\race_death.dta", replace
merge year race age using "E:\Data\CDC Pop\race_pop.dta"

gen mx = (death/pop)*100000

save "E:\Data\covid2020\data_nation\race_mx.dta", replace

use "E:\Data\covid2020\data_nation\total_death.dta", replace
merge year age using "E:\Data\CDC Pop\total_pop.dta"

gen mx = (death/pop)*100000

save "E:\Data\covid2020\data_nation\total_mx.dta", replace
```

## Import NCHS Provisional Death Counts, 2021, and Merge with Census Population Estimates

```
***** All US Pop *****

*** 2021 NCHS Mortality Data, by Week ***

import delimited "/Users/ryan/Desktop/Dropbox_sync/Dropbox/My Mac (Ryan's
MacBook)/Documents/Papers/LE Trends_COVID/NCHS
Data/AH_Excess_Deaths_by_Sex__Age__and__Race__2__23__22.csv", encoding(ISO-8859-
1)

drop footnote geography

drop numberaboveaverageweighted percentaboveaverageweighted
numberaboveaverageunweighted percentaboveaverageunweighted

drop timeperiod analysisdate weekending

keep if mmwryear == 2021

keep if raceethnicity == "All Race/Ethnicity Groups"

drop covid19weighted covid19unweighted averagenumberofdeathsweighted
averagenumberofdeathsunweighted

keep if sex == "All Sexes"

encode agegroup, gen(age)

drop if age == 17 | age == 18

*** Sum Deaths for Entire 2021 by Age ***

sort age

collapse (sum) mort = deathsunweighted, by(age)

save "/Users/ryan/Documents/Papers/LE Trends_COVID/NCHS Data/total pop_age
specific death counts_2021.dta", replace

***** Import 2021 Pop Estimates *****

* Linear Trend Approximations from Age-specific Populations, Census Vintage
2020 Bridged-Race: 2017-2020
* All US Pop, 0-14, 5-9, ... ,80-84, 85+

import excel "/Users/ryan/Documents/Papers/LE
Trends_COVID/pop_cdc/pop_21.xlsx", sheet("total") firstrow clear

merge using "/Users/ryan/Documents/Papers/LE Trends_COVID/NCHS Data/total
pop_age specific death counts_2021.dta"

drop _merge

gen mx = mort/pop
```



```

save "/Users/ryan/Documents/Papers/LE Trends_COVID/NCHS Data/total pop_2021
mx.dta", replace

***** All Male and All Female *****

*** 2021 NCHS Mortality Data, by Week ***

import delimited "/Users/ryan/Desktop/Dropbox_sync/Dropbox/My Mac (Ryan's
MacBook)/Documents/Papers/LE Trends_COVID/NCHS
Data/AH_Excess_Deaths_by_Sex__Age__and_Race_2_23_22.csv", encoding(ISO-8859-
1)

drop footnote geography

drop numberaboveaverageweighted percentaboveaverageweighted
numberaboveaverageunweighted percentaboveaverageunweighted

drop timeperiod analysisdate weekending

keep if mmwryear == 2021

keep if raceethnicity == "All Race/Ethnicity Groups"

drop covid19weighted covid19unweighted averagenumberofdeathsweighted
averagenumberofdeathsunweighted

encode sex, gen(female)
encode agegroup, gen(age)

drop if female == 1
replace female = 1 if female == 2
replace female = 0 if female == 3

label define female1 0 "male" 1 "female"
label values female female1

drop if age == 17 | age == 18

*** Sum Deaths for Entire 2021 by Age for Men and Women ***

sort female age

collapse (sum) mort = deathsunweighted, by(female age)

sort female age

save "/Users/ryan/Documents/Papers/LE Trends_COVID/NCHS Data/total sex_age
specific death counts_2021.dta", replace

***** Import 2021 Pop Estimates *****

* Linear Trend Approximations from Age-specific Populations, CDC Wonder Pop:
2017-2020

```

```

* All US Pop, 0-14, 5-9, ... ,80-84, 85+

import excel "/Users/ryan/Documents/Papers/LE
Trends_COVID/pop_cdc/pop_21.xlsx", sheet("sex") firstrow clear

sort female age

merge using "/Users/ryan/Documents/Papers/LE Trends_COVID/NCHS Data/total
sex_age specific death counts_2021.dta"

drop _merge

gen mx = mort/pop

save "/Users/ryan/Documents/Papers/LE Trends_COVID/NCHS Data/total sex_2021
mx.dta", replace

***** All Race/Ethnicity *****

*** 2021 NCHS Mortality Data, by Week ***

import delimited "/Users/ryan/Desktop/Dropbox_sync/Dropbox/My Mac (Ryan's
MacBook)/Documents/Papers/LE Trends_COVID/NCHS
Data/AH_Excess_Deaths_by_Sex__Age__and_Race_2_23_22.csv", encoding(ISO-8859-
1)

drop footnote geography

drop numberaboveaverageweighted percentaboveaverageweighted
numberaboveaverageunweighted percentaboveaverageunweighted

drop timeperiod analysisdate weekending

keep if mmwryear == 2021

drop covid19weighted covid19unweighted averagenumberofdeathsweighted
averagenumberofdeathsunweighted

keep if sex == "All Sexes"

encode agegroup, gen(age)
encode raceethnicity, gen(race_e)

drop if age == 17 | age == 18

tab race_e
tab race_e, nolabel

keep if race_e == 5 | race_e == 7 | race_e == 2

* Race/Eth
* 1=NH Black
* 2=Latino/a

```

```

* 3=NH White

gen race = .
replace race = 1 if race_e == 5
replace race = 2 if race_e == 2
replace race = 3 if race_e == 7

label define racel 1 "Black" 2 "Latino" 3 "white"
label values race racel

*** Sum Deaths for Entire 2020 by Age for Race/Eth Pops Total ***

sort race age

collapse (sum) mort = deathsunweighted, by(race age)

sort race age

save "/Users/ryan/Documents/Papers/LE Trends_COVID/NCHS Data/race_age
specific death counts_2021.dta", replace

***** Import 2021 Pop Estimates *****

* Linear Trend Approximations from Age-specific Populations, CDC Wonder Pop:
2017-2020
* All US Pop, 0-14, 5-9, ... ,80-84, 85+

import excel "/Users/ryan/Documents/Papers/LE
Trends_COVID/pop_cdc/pop_21.xlsx", sheet("race") firstrow clear

sort race age

merge using "/Users/ryan/Documents/Papers/LE Trends_COVID/NCHS Data/race_age
specific death counts_2021.dta"

drop _merge

gen mx = mort/pop

save "/Users/ryan/Documents/Papers/LE Trends_COVID/NCHS Data/race_2021
mx.dta", replace

***** Sex X Race/Ethnicity *****

*** 2021 NCHS Mortality Data, by Week ***

import delimited "/Users/ryan/Desktop/Dropbox_sync/Dropbox/My Mac (Ryan's
MacBook)/Documents/Papers/LE Trends_COVID/NCHS
Data/AH_Excess_Deaths_by_Sex__Age__and_Race_2_23_22.csv", encoding(ISO-8859-
1)

drop footnote geography

drop numberaboveaverageweighted percentaboveaverageweighted
numberaboveaverageunweighted percentaboveaverageunweighted

```

```

drop timeperiod analysisdate weekending

keep if mmwryear == 2021

drop covid19weighted covid19unweighted averagenumberofdeathsweighted
averagenumberofdeathsunweighted

encode sex, gen(female)
encode agegroup, gen(age)
encode raceethnicity, gen(race_e)

drop if female == 1
replace female = 1 if female == 2
replace female = 0 if female == 3

label define femalel 0 "male" 1 "female"
label values female femalel

drop if age == 17 | age == 18

tab race_e
tab race_e, nolabel

keep if race_e == 5 | race_e == 7 | race_e == 2

* Race/Eth
* 1=NH Black
* 2=Latino/a
* 3=NH White

gen race = .
replace race = 1 if race_e == 5
replace race = 2 if race_e == 2
replace race = 3 if race_e == 7

label define racel 1 "Black" 2 "Latino" 3 "white"
label values race racel

*** Sum Deaths for Entire 2021 by Age for NWB and NHW Men and Women ***

sort race female age

collapse (sum) mort = deathsunweighted, by(race female age)

sort female race age

save "/Users/ryan/Documents/Papers/LE Trends_COVID/NCHS Data/race_sex_age
specific death counts_2021.dta", replace

***** Import 2021 Pop Estimates *****

* Linear Trend Approximations from Age-specific Populations, CDC Wonder Pop:
2017-2020
* All US Pop, 0-14, 5-9, ... ,80-84, 85+

```

```
import excel "/Users/ryan/Documents/Papers/LE  
Trends_COVID/pop_cdc/pop_21.xlsx", sheet("race_sex") firstrow clear  
  
sort female race age  
  
merge using "/Users/ryan/Documents/Papers/LE Trends_COVID/NCHS  
Data/race_sex_age specific death counts_2021.dta"  
  
drop _merge  
  
gen mx = mort/pop  
  
save "/Users/ryan/Documents/Papers/LE Trends_COVID/NCHS Data/race_sex_2021  
mx.dta", replace
```

## 2021 Life Tables: U.S. Female Population, Germany Male Population, Spain Total Population

### U.S. Female Population, 2021

```
# -*- coding: utf-8 -*-
```

```
"""
```

```
Created 3/31/2022, AH Excess 2/23/22 Data
```

```
@author: ryan masters
```

```
"""
```

```
#import packages
```

```
import random
```

```
female_t = r"/Users/ryan/Documents/Papers/LE Trends_COVID/2021 Life Expectancy/simulations/us/female_t.txt"
```

```
textFile = open(female_t,'r')
```

```
text = textFile.readlines()
```

```
# split into different age categories
```

```
a0=text[1]
```

```
a1=text[2]
```

```
a5=text[3]
```

```
a10=text[4]
```

```
a15=text[5]
```

```
a20=text[6]
```

```
a25=text[7]
```

```
a30=text[8]
```

```
a35=text[9]
```

```
a40=text[10]
```

```
a45=text[11]
```

```
a50=text[12]
```

```
a55=text[13]
```

```
a60=text[14]
```

```
a65=text[15]
```

```
a70=text[16]
```

```
a75=text[17]
```

```
a80=text[18]
```

```
a85=text[19]
```

```
a90=text[20]
```

```
a95=text[21]
```

```
a100=text[22]
```

```
a0_sp = a0.split(",")
```

```
a1_sp = a1.split(",")
```

```
a5_sp = a5.split(",")
```

```
a10_sp = a10.split(",")
```

```
a15_sp = a15.split(",")
```

```
a20_sp = a20.split(",")
```

```
a25_sp = a25.split(",")
```

```
a30_sp = a30.split(",")
```

```
a35_sp = a35.split(",")
```

```
a40_sp = a40.split(",")
a45_sp = a45.split(",")
a50_sp = a50.split(",")
a55_sp = a55.split(",")
a60_sp = a60.split(",")
a65_sp = a65.split(",")
a70_sp = a70.split(",")
a75_sp = a75.split(",")
a80_sp = a80.split(",")
a85_sp = a85.split(",")
a90_sp = a90.split(",")
a95_sp = a95.split(",")
a100_sp = a100.split(",")
```

```
# qx
```

```
a0_qx = float(a0_sp[1])
a1_qx = float(a1_sp[1])
a5_qx = float(a5_sp[1])
a10_qx = float(a10_sp[1])
a15_qx = float(a15_sp[1])
a20_qx = float(a20_sp[1])
a25_qx = float(a25_sp[1])
a30_qx = float(a30_sp[1])
a35_qx = float(a35_sp[1])
a40_qx = float(a40_sp[1])
a45_qx = float(a45_sp[1])
a50_qx = float(a50_sp[1])
a55_qx = float(a55_sp[1])
a60_qx = float(a60_sp[1])
a65_qx = float(a65_sp[1])
a70_qx = float(a70_sp[1])
a75_qx = float(a75_sp[1])
a80_qx = float(a80_sp[1])
a85_qx = float(a85_sp[1])
a90_qx = float(a90_sp[1])
a95_qx = float(a95_sp[1])
a100_qx = float(a100_sp[1])
```

```
# qx - lower bound
```

```
a0_qxl = float(a0_sp[2])
a1_qxl = float(a1_sp[2])
a5_qxl = float(a5_sp[2])
a10_qxl = float(a10_sp[2])
a15_qxl = float(a15_sp[2])
a20_qxl = float(a20_sp[2])
a25_qxl = float(a25_sp[2])
a30_qxl = float(a30_sp[2])
a35_qxl = float(a35_sp[2])
a40_qxl = float(a40_sp[2])
a45_qxl = float(a45_sp[2])
a50_qxl = float(a50_sp[2])
a55_qxl = float(a55_sp[2])
a60_qxl = float(a60_sp[2])
```

```
a65_qxl = float(a65_sp[2])
a70_qxl = float(a70_sp[2])
a75_qxl = float(a75_sp[2])
a80_qxl = float(a80_sp[2])
a85_qxl = float(a85_sp[2])
a90_qxl = float(a90_sp[2])
a95_qxl = float(a95_sp[2])
a100_qxl = float(a100_sp[2])
```

```
# qx - Upper bound
```

```
a0_qxu = float(a0_sp[3])
a1_qxu = float(a1_sp[3])
a5_qxu = float(a5_sp[3])
a10_qxu = float(a10_sp[3])
a15_qxu = float(a15_sp[3])
a20_qxu = float(a20_sp[3])
a25_qxu = float(a25_sp[3])
a30_qxu = float(a30_sp[3])
a35_qxu = float(a35_sp[3])
a40_qxu = float(a40_sp[3])
a45_qxu = float(a45_sp[3])
a50_qxu = float(a50_sp[3])
a55_qxu = float(a55_sp[3])
a60_qxu = float(a60_sp[3])
a65_qxu = float(a65_sp[3])
a70_qxu = float(a70_sp[3])
a75_qxu = float(a75_sp[3])
a80_qxu = float(a80_sp[3])
a85_qxu = float(a85_sp[3])
a90_qxu = float(a90_sp[3])
a95_qxu = float(a95_sp[3])
a100_qxu = float(a100_sp[3])
```

```
# ax
```

```
a0_ax = float(a0_sp[4])
a1_ax = float(a1_sp[4])
a5_ax = float(a5_sp[4])
a10_ax = float(a10_sp[4])
a15_ax = float(a15_sp[4])
a20_ax = float(a20_sp[4])
a25_ax = float(a25_sp[4])
a30_ax = float(a30_sp[4])
a35_ax = float(a35_sp[4])
a40_ax = float(a40_sp[4])
a45_ax = float(a45_sp[4])
a50_ax = float(a50_sp[4])
a55_ax = float(a55_sp[4])
a60_ax = float(a60_sp[4])
a65_ax = float(a65_sp[4])
a70_ax = float(a70_sp[4])
a75_ax = float(a75_sp[4])
a80_ax = float(a80_sp[4])
```



```
a85_ax = float(a85_sp[4])
a90_ax = float(a90_sp[4])
a95_ax = float(a95_sp[4])
a100_ax = float(a100_sp[4])
```

```
# ax - LB
```

```
a0_axl = float(a0_sp[5])
a1_axl = float(a1_sp[5])
a5_axl = float(a5_sp[5])
a10_axl = float(a10_sp[5])
a15_axl = float(a15_sp[5])
a20_axl = float(a20_sp[5])
a25_axl = float(a25_sp[5])
a30_axl = float(a30_sp[5])
a35_axl = float(a35_sp[5])
a40_axl = float(a40_sp[5])
a45_axl = float(a45_sp[5])
a50_axl = float(a50_sp[5])
a55_axl = float(a55_sp[5])
a60_axl = float(a60_sp[5])
a65_axl = float(a65_sp[5])
a70_axl = float(a70_sp[5])
a75_axl = float(a75_sp[5])
a80_axl = float(a80_sp[5])
a85_axl = float(a85_sp[5])
a90_axl = float(a90_sp[5])
a95_axl = float(a95_sp[5])
a100_axl = float(a100_sp[5])
```

```
# ax - UB
```

```
a0_axu = float(a0_sp[6])
a1_axu = float(a1_sp[6])
a5_axu = float(a5_sp[6])
a10_axu = float(a10_sp[6])
a15_axu = float(a15_sp[6])
a20_axu = float(a20_sp[6])
a25_axu = float(a25_sp[6])
a30_axu = float(a30_sp[6])
a35_axu = float(a35_sp[6])
a40_axu = float(a40_sp[6])
a45_axu = float(a45_sp[6])
a50_axu = float(a50_sp[6])
a55_axu = float(a55_sp[6])
a60_axu = float(a60_sp[6])
a65_axu = float(a65_sp[6])
a70_axu = float(a70_sp[6])
a75_axu = float(a75_sp[6])
a80_axu = float(a80_sp[6])
a85_axu = float(a85_sp[6])
a90_axu = float(a90_sp[6])
a95_axu = float(a95_sp[6])
```

```

a100_axu = float(a100_sp[6])

count = 0
while count < 50000: #5000: #50000

# Random qx by age - need to check we are not getting any values below zero

# make this uniform
a0_rand_qx = random.uniform(a0_qxl,a0_qxu)
a1_rand_qx = random.uniform(a1_qxl,a1_qxu)
a5_rand_qx = random.uniform(a5_qxl,a5_qxu)
a10_rand_qx = random.uniform(a10_qxl,a10_qxu)
a15_rand_qx = random.uniform(a15_qxl,a15_qxu)
a20_rand_qx = random.uniform(a20_qxl,a20_qxu)
a25_rand_qx = random.uniform(a25_qxl,a25_qxu)
a30_rand_qx = random.uniform(a30_qxl,a30_qxu)
a35_rand_qx = random.uniform(a35_qxl,a35_qxu)
a40_rand_qx = random.uniform(a40_qxl,a40_qxu)
a45_rand_qx = random.uniform(a45_qxl,a45_qxu)
a50_rand_qx = random.uniform(a50_qxl,a50_qxu)
a55_rand_qx = random.uniform(a55_qxl,a55_qxu)
a60_rand_qx = random.uniform(a60_qxl,a60_qxu)
a65_rand_qx = random.uniform(a65_qxl,a65_qxu)
a70_rand_qx = random.uniform(a70_qxl,a70_qxu)
a75_rand_qx = random.uniform(a75_qxl,a75_qxu)
a80_rand_qx = random.uniform(a80_qxl,a80_qxu)
a85_rand_qx = random.uniform(a85_qxl,a85_qxu)
a90_rand_qx = random.uniform(a90_qxl,a90_qxu)
a95_rand_qx = random.uniform(a95_qxl,a95_qxu)
a100_rand_qx = 1

# Random ax by age - need to check we are not getting any values below zero

# make this uniform
a0_rand_ax = random.uniform(a0_axl,a0_axu)
a1_rand_ax = random.uniform(a1_axl,a1_axu)
a5_rand_ax = random.uniform(a5_axl,a5_axu)
a10_rand_ax = random.uniform(a10_axl,a10_axu)
a15_rand_ax = random.uniform(a15_axl,a15_axu)
a20_rand_ax = random.uniform(a20_axl,a20_axu)
a25_rand_ax = random.uniform(a25_axl,a25_axu)
a30_rand_ax = random.uniform(a30_axl,a30_axu)
a35_rand_ax = random.uniform(a35_axl,a35_axu)
a40_rand_ax = random.uniform(a40_axl,a40_axu)
a45_rand_ax = random.uniform(a45_axl,a45_axu)
a50_rand_ax = random.uniform(a50_axl,a50_axu)
a55_rand_ax = random.uniform(a55_axl,a55_axu)
a60_rand_ax = random.uniform(a60_axl,a60_axu)
a65_rand_ax = random.uniform(a65_axl,a65_axu)
a70_rand_ax = random.uniform(a70_axl,a70_axu)
a75_rand_ax = random.uniform(a75_axl,a75_axu)

```

```

a80_rand_ax = random.uniform(a80_axl,a80_axu)
a85_rand_ax = random.uniform(a85_axl,a85_axu)
a90_rand_ax = random.uniform(a90_axl,a90_axu)
a95_rand_ax = random.uniform(a95_axl,a95_axu)
a100_rand_ax = random.uniform(a100_axl,a100_axu)

### calculate life table variables
radix = 1000000.0000000

# calculate the number of deaths age0
a0_dx = a0_rand_qx*radix
# calculate survivors
a0_lx=radix
a0_sx=a0_lx/radix # this is 1?
a1_lx=(radix-a0_dx)
a1_sx = a1_lx/radix

# calculate the number of deaths age1
a1_dx = a1_rand_qx*a1_lx
# calculate survivors
a5_lx=(a1_lx-a1_dx)
a5_sx = a5_lx/radix

# calculate the number of deaths age5
a5_dx = a5_rand_qx*a5_lx
# calculate survivors
a10_lx=(a5_lx-a5_dx)
a10_sx = a10_lx/radix

# calculate the number of deaths age10
a10_dx = a10_rand_qx*a10_lx
# calculate survivors
a15_lx=(a10_lx-a10_dx)
a15_sx = a15_lx/radix

# calculate the number of deaths age15
a15_dx = a15_rand_qx*a15_lx
# calculate survivors
a20_lx=(a15_lx-a15_dx)
a20_sx = a20_lx/radix

# calculate the number of deaths age20
a20_dx = a20_rand_qx*a20_lx
# calculate survivors
a25_lx=(a20_lx-a20_dx)
a25_sx = a25_lx/radix

# calculate the number of deaths age25
a25_dx = a25_rand_qx*a25_lx
# calculate survivors
a30_lx=(a25_lx-a25_dx)
a30_sx = a30_lx/radix

```

```
# calculate the number of deaths age30
a30_dx = a30_rand_qx*a30_lx
# calculate survivors
a35_lx=(a30_lx-a30_dx)
a35_sx = a35_lx/radix
```

```
# calculate the number of deaths age35
a35_dx = a35_rand_qx*a35_lx
# calculate survivors
a40_lx=(a35_lx-a35_dx)
a40_sx = a40_lx/radix
```

```
# calculate the number of deaths age40
a40_dx = a40_rand_qx*a40_lx
# calculate survivors
a45_lx=(a40_lx-a40_dx)
a45_sx = a45_lx/radix
```

```
# calculate the number of deaths age45
a45_dx = a45_rand_qx*a45_lx
# calculate survivors
a50_lx=(a45_lx-a45_dx)
a50_sx = a50_lx/radix
```

```
# calculate the number of deaths age50
a50_dx = a50_rand_qx*a50_lx
# calculate survivors
a55_lx=(a50_lx-a50_dx)
a55_sx = a55_lx/radix
```

```
# calculate the number of deaths age55
a55_dx = a55_rand_qx*a55_lx
# calculate survivors
a60_lx=(a55_lx-a55_dx)
a60_sx = a60_lx/radix
```

```
# calculate the number of deaths age60
a60_dx = a60_rand_qx*a60_lx
# calculate survivors
a65_lx=(a60_lx-a60_dx)
a65_sx = a65_lx/radix
```

```
# calculate the number of deaths age65
a65_dx = a65_rand_qx*a65_lx
# calculate survivors
a70_lx=(a65_lx-a65_dx)
a70_sx = a70_lx/radix
```

```
# calculate the number of deaths age70
a70_dx = a70_rand_qx*a70_lx
# calculate survivors
a75_lx=(a70_lx-a70_dx)
```

```

a75_sx = a75_lx/radix

# calculate the number of deaths age75
a75_dx = a75_rand_qx*a75_lx
# calculate survivors
a80_lx=(a75_lx-a75_dx)
a80_sx = a80_lx/radix

# calculate the number of deaths age80
a80_dx = a80_rand_qx*a80_lx
# calculate survivors
a85_lx=(a80_lx-a80_dx)
a85_sx = a85_lx/radix

# calculate the number of deaths age85
a85_dx = a85_rand_qx*a85_lx
# calculate survivors
a90_lx=(a85_lx-a85_dx)
a90_sx = a90_lx/radix

# calculate the number of deaths age90
a90_dx = a90_rand_qx*a90_lx
# calculate survivors
a95_lx=(a90_lx-a90_dx)
a95_sx = a95_lx/radix

# calculate the number of deaths age95
a95_dx = a95_rand_qx*a95_lx
# calculate survivors
a100_lx=(a95_lx-a95_dx)
a100_sx = a100_lx/radix

# calculate the number of deaths age100
a100_dx = a100_rand_qx*a100_lx
# No survivors- top-coded

#calculate Lx
a0_Lx = (a1_lx*1)+(a0_dx*a0_rand_ax)
a1_Lx = (a5_lx*4)+(a1_dx*a1_rand_ax)
a5_Lx = (a10_lx*5)+(a5_dx*a5_rand_ax)
a10_Lx = (a15_lx*5)+(a10_dx*a10_rand_ax)
a15_Lx = (a20_lx*5)+(a15_dx*a15_rand_ax)
a20_Lx = (a25_lx*5)+(a20_dx*a20_rand_ax)
a25_Lx = (a30_lx*5)+(a25_dx*a25_rand_ax)
a30_Lx = (a35_lx*5)+(a30_dx*a30_rand_ax)
a35_Lx = (a40_lx*5)+(a35_dx*a35_rand_ax)
a40_Lx = (a45_lx*5)+(a40_dx*a40_rand_ax)
a45_Lx = (a50_lx*5)+(a45_dx*a45_rand_ax)
a50_Lx = (a55_lx*5)+(a50_dx*a50_rand_ax)
a55_Lx = (a60_lx*5)+(a55_dx*a55_rand_ax)
a60_Lx = (a65_lx*5)+(a60_dx*a60_rand_ax)
a65_Lx = (a70_lx*5)+(a65_dx*a65_rand_ax)

```

```

a70_Lx = (a75_Lx*5)+(a70_dx*a70_rand_ax)
a75_Lx = (a80_Lx*5)+(a75_dx*a75_rand_ax)
a80_Lx = (a85_Lx*5)+(a80_dx*a80_rand_ax)
a85_Lx = (a90_Lx*5)+(a85_dx*a85_rand_ax)
a90_Lx = (a95_Lx*5)+(a90_dx*a90_rand_ax)
a95_Lx = (a100_Lx*5)+(a95_dx*a95_rand_ax)
a100_Lx = (a100_dx*a100_rand_ax)

```

```
####
```

```
# calculate Tx
```

```
a0_Tx =
```

```
a0_Lx+a1_Lx+a5_Lx+a10_Lx+a15_Lx+a20_Lx+a25_Lx+a30_Lx+a35_Lx+a40_Lx+a45_Lx+a50_Lx+a55_Lx+a60_Lx+
a65_Lx+a70_Lx+a75_Lx+a80_Lx+a85_Lx+a90_Lx+a95_Lx+a100_Lx
```

```
a1_Tx =
```

```
a1_Lx+a5_Lx+a10_Lx+a15_Lx+a20_Lx+a25_Lx+a30_Lx+a35_Lx+a40_Lx+a45_Lx+a50_Lx+a55_Lx+a60_Lx+a65_Lx
+a70_Lx+a75_Lx+a80_Lx+a85_Lx+a90_Lx+a95_Lx+a100_Lx
```

```
a5_Tx =
```

```
a5_Lx+a10_Lx+a15_Lx+a20_Lx+a25_Lx+a30_Lx+a35_Lx+a40_Lx+a45_Lx+a50_Lx+a55_Lx+a60_Lx+a65_Lx+a70_L
x+a75_Lx+a80_Lx+a85_Lx+a90_Lx+a95_Lx+a100_Lx
```

```
a10_Tx =
```

```
a10_Lx+a15_Lx+a20_Lx+a25_Lx+a30_Lx+a35_Lx+a40_Lx+a45_Lx+a50_Lx+a55_Lx+a60_Lx+a65_Lx+a70_L+a75_
Lx+a80_Lx+a85_Lx+a90_Lx+a95_Lx+a100_Lx
```

```
a15_Tx =
```

```
a15_Lx+a20_Lx+a25_Lx+a30_Lx+a35_Lx+a40_Lx+a45_Lx+a50_Lx+a55_Lx+a60_Lx+a65_Lx+a70_Lx+a75_Lx+a80_
Lx+a85_Lx+a90_Lx+a95_Lx+a100_Lx
```

```
a20_Tx =
```

```
a20_Lx+a25_Lx+a30_Lx+a35_Lx+a40_Lx+a45_Lx+a50_Lx+a55_Lx+a60_Lx+a65_Lx+a70_Lx+a75_Lx+a80_Lx+a85_
Lx+a90_Lx+a95_Lx+a100_Lx
```

```
a25_Tx =
```

```
a25_Lx+a30_Lx+a35_Lx+a40_Lx+a45_Lx+a50_Lx+a55_Lx+a60_Lx+a65_Lx+a70_Lx+a75_Lx+a80_Lx+a85_Lx+a90_
Lx+a95_Lx+a100_Lx
```

```
a30_Tx =
```

```
a30_Lx+a35_Lx+a40_Lx+a45_Lx+a50_Lx+a55_Lx+a60_Lx+a65_Lx+a70_Lx+a75_Lx+a80_Lx+a85_Lx+a90_Lx+a95_
Lx+a100_Lx
```

```
a35_Tx =
```

```
a35_Lx+a40_Lx+a45_Lx+a50_Lx+a55_Lx+a60_Lx+a65_Lx+a70_Lx+a75_Lx+a80_Lx+a85_Lx+a90_Lx+a95_Lx+a100_
_Lx
```

```
a40_Tx =
```

```
a40_Lx+a45_Lx+a50_Lx+a55_Lx+a60_Lx+a65_Lx+a70_Lx+a75_Lx+a80_Lx+a85_Lx+a90_Lx+a95_Lx+a100_Lx
```

```
a45_Tx = a45_Lx+a50_Lx+a55_Lx+a60_Lx+a65_Lx+a70_Lx+a75_Lx+a80_Lx+a85_Lx+a90_Lx+a95_Lx+a100_Lx
```

```
a50_Tx = a50_Lx+a55_Lx+a60_Lx+a65_Lx+a70_Lx+a75_Lx+a80_Lx+a85_Lx+a90_Lx+a95_Lx+a100_Lx
```

```
a55_Tx = a55_Lx+a60_Lx+a65_Lx+a70_Lx+a75_Lx+a80_Lx+a85_Lx+a90_Lx+a95_Lx+a100_Lx
```

```
a60_Tx = a60_Lx+a65_Lx+a70_Lx+a75_Lx+a80_Lx+a85_Lx+a90_Lx+a95_Lx+a100_Lx
```

```
a65_Tx = a65_Lx+a70_Lx+a75_Lx+a80_Lx+a85_Lx+a90_Lx+a95_Lx+a100_Lx
```

```
a70_Tx = a70_Lx+a75_Lx+a80_Lx+a85_Lx+a90_Lx+a95_Lx+a100_Lx
```

```
a75_Tx = a75_Lx+a80_Lx+a85_Lx+a90_Lx+a95_Lx+a100_Lx
```

```
a80_Tx = a80_Lx+a85_Lx+a90_Lx+a95_Lx+a100_Lx
```

```
a85_Tx = a85_Lx+a90_Lx+a95_Lx+a100_Lx
```

```
a90_Tx = a90_Lx+a95_Lx+a100_Lx
```

```
a95_Tx = a95_Lx+a100_Lx
```

```
a100_Tx = a100_Lx
```

```

##### estimate life expectancy

#calculate ex
a0_ex = a0_Tx/radix
a1_ex = a1_Tx/a1_lx
a5_ex = a5_Tx/a5_lx
a10_ex = a10_Tx/a10_lx
a15_ex = a15_Tx/a15_lx
a20_ex = a20_Tx/a20_lx
a25_ex = a25_Tx/a25_lx
a30_ex = a30_Tx/a30_lx
a35_ex = a35_Tx/a35_lx
a40_ex = a40_Tx/a40_lx
a45_ex = a45_Tx/a45_lx
a50_ex = a50_Tx/a50_lx
a55_ex = a55_Tx/a55_lx
a60_ex = a60_Tx/a60_lx
a65_ex = a65_Tx/a65_lx
a70_ex = a70_Tx/a70_lx
a75_ex = a75_Tx/a75_lx
a80_ex = a80_Tx/a80_lx
a85_ex = a85_Tx/a85_lx
a90_ex = a90_Tx/a90_lx
a95_ex = a95_Tx/a95_lx
a100_ex = a100_Tx/a100_lx

# save data

tot_file_name = r"/Users/ryan/Documents/Papers/LE Trends_COVID/2021 Life
Expectancy/simulations/us/female_t_ex.txt"
tot_opened_file = open(tot_file_name, 'a')

if count==0:
    tot_opened_file.write('{0} {1} {2}\n'.format("sim_num","age","ex"))
    tot_opened_file.write('{0} {1} {2}\n'.format(count,"0",a0_ex))
    tot_opened_file.write('{0} {1} {2}\n'.format(count,"1",a1_ex))
    tot_opened_file.write('{0} {1} {2}\n'.format(count,"5",a5_ex))
    tot_opened_file.write('{0} {1} {2}\n'.format(count,"10",a10_ex))
    tot_opened_file.write('{0} {1} {2}\n'.format(count,"15",a15_ex))
    tot_opened_file.write('{0} {1} {2}\n'.format(count,"20",a20_ex))
    tot_opened_file.write('{0} {1} {2}\n'.format(count,"25",a25_ex))
    tot_opened_file.write('{0} {1} {2}\n'.format(count,"30",a30_ex))
    tot_opened_file.write('{0} {1} {2}\n'.format(count,"35",a35_ex))
    tot_opened_file.write('{0} {1} {2}\n'.format(count,"40",a40_ex))
    tot_opened_file.write('{0} {1} {2}\n'.format(count,"45",a45_ex))
    tot_opened_file.write('{0} {1} {2}\n'.format(count,"50",a50_ex))
    tot_opened_file.write('{0} {1} {2}\n'.format(count,"55",a55_ex))
    tot_opened_file.write('{0} {1} {2}\n'.format(count,"60",a60_ex))
    tot_opened_file.write('{0} {1} {2}\n'.format(count,"65",a65_ex))
    tot_opened_file.write('{0} {1} {2}\n'.format(count,"70",a70_ex))

```

```
tot_opened_file.write('{0} {1} {2}\n'.format(count,"75",a75_ex))
tot_opened_file.write('{0} {1} {2}\n'.format(count,"80",a80_ex))
tot_opened_file.write('{0} {1} {2}\n'.format(count,"85",a85_ex))
tot_opened_file.write('{0} {1} {2}\n'.format(count,"90",a90_ex))
tot_opened_file.write('{0} {1} {2}\n'.format(count,"95",a95_ex))
tot_opened_file.write('{0} {1} {2}\n'.format(count,"100",a100_ex))
```

else:

```
tot_opened_file.write('{0} {1} {2}\n'.format(count,"0",a0_ex))
tot_opened_file.write('{0} {1} {2}\n'.format(count,"1",a1_ex))
tot_opened_file.write('{0} {1} {2}\n'.format(count,"5",a5_ex))
tot_opened_file.write('{0} {1} {2}\n'.format(count,"10",a10_ex))
tot_opened_file.write('{0} {1} {2}\n'.format(count,"15",a15_ex))
tot_opened_file.write('{0} {1} {2}\n'.format(count,"20",a20_ex))
tot_opened_file.write('{0} {1} {2}\n'.format(count,"25",a25_ex))
tot_opened_file.write('{0} {1} {2}\n'.format(count,"30",a30_ex))
tot_opened_file.write('{0} {1} {2}\n'.format(count,"35",a35_ex))
tot_opened_file.write('{0} {1} {2}\n'.format(count,"40",a40_ex))
tot_opened_file.write('{0} {1} {2}\n'.format(count,"45",a45_ex))
tot_opened_file.write('{0} {1} {2}\n'.format(count,"50",a50_ex))
tot_opened_file.write('{0} {1} {2}\n'.format(count,"55",a55_ex))
tot_opened_file.write('{0} {1} {2}\n'.format(count,"60",a60_ex))
tot_opened_file.write('{0} {1} {2}\n'.format(count,"65",a65_ex))
tot_opened_file.write('{0} {1} {2}\n'.format(count,"70",a70_ex))
tot_opened_file.write('{0} {1} {2}\n'.format(count,"75",a75_ex))
tot_opened_file.write('{0} {1} {2}\n'.format(count,"80",a80_ex))
tot_opened_file.write('{0} {1} {2}\n'.format(count,"85",a85_ex))
tot_opened_file.write('{0} {1} {2}\n'.format(count,"90",a90_ex))
tot_opened_file.write('{0} {1} {2}\n'.format(count,"95",a95_ex))
tot_opened_file.write('{0} {1} {2}\n'.format(count,"100",a100_ex))
```

```
print(count)
```

```
count += 1 # This is the same as count = count + 1
```

```
tot_opened_file.close()
```

```
print("simulation completed")
```



## Germany Male Population, 2021

```
# -*- coding: utf-8 -*-
```

```
"""
```

```
Created 3/31
```

```
Deut/Male 2021 Life Tables from 2018 LT qx*2021:2018RR and 2018 LT ax
```

```
@author: ryan masters
```

```
"""
```

```
#import packages
```

```
import random
```

```
deu_m = r"/Users/ryan/Documents/Papers/LE Trends_COVID/2021 Life  
Expectancy/simulations/peer/male/deu_m.txt"
```

```
# read in the file
```

```
textFile = open(deu_m,'r')
```

```
text = textFile.readlines()
```

```
# split into different age categories
```

```
a0=text[1]
```

```
a1=text[2]
```

```
a5=text[3]
```

```
a10=text[4]
```

```
a15=text[5]
```

```
a20=text[6]
```

```
a25=text[7]
```

```
a30=text[8]
```

```
a35=text[9]
```

```
a40=text[10]
```

```
a45=text[11]
```

```
a50=text[12]
```

```
a55=text[13]
a60=text[14]
a65=text[15]
a70=text[16]
a75=text[17]
a80=text[18]
a85=text[19]
a90=text[20]
a95=text[21]
a100=text[22]
```

```
a0_sp = a0.split(",")
a1_sp = a1.split(",")
a5_sp = a5.split(",")
a10_sp = a10.split(",")
a15_sp = a15.split(",")
a20_sp = a20.split(",")
a25_sp = a25.split(",")
a30_sp = a30.split(",")
a35_sp = a35.split(",")
a40_sp = a40.split(",")
a45_sp = a45.split(",")
a50_sp = a50.split(",")
a55_sp = a55.split(",")
a60_sp = a60.split(",")
a65_sp = a65.split(",")
a70_sp = a70.split(",")
a75_sp = a75.split(",")
a80_sp = a80.split(",")
a85_sp = a85.split(",")
a90_sp = a90.split(",")
a95_sp = a95.split(",")
a100_sp = a100.split(",")
```

```
# qx
a0_qx = float(a0_sp[1])
a1_qx = float(a1_sp[1])
a5_qx = float(a5_sp[1])
a10_qx = float(a10_sp[1])
a15_qx = float(a15_sp[1])
a20_qx = float(a20_sp[1])
a25_qx = float(a25_sp[1])
a30_qx = float(a30_sp[1])
a35_qx = float(a35_sp[1])
a40_qx = float(a40_sp[1])
a45_qx = float(a45_sp[1])
a50_qx = float(a50_sp[1])
a55_qx = float(a55_sp[1])
a60_qx = float(a60_sp[1])
a65_qx = float(a65_sp[1])
a70_qx = float(a70_sp[1])
```

```
a75_qx = float(a75_sp[1])
a80_qx = float(a80_sp[1])
a85_qx = float(a85_sp[1])
a90_qx = float(a90_sp[1])
a95_qx = float(a95_sp[1])
a100_qx = float(a100_sp[1])
```

```
# qx - lower bound
```

```
a0_qxl = float(a0_sp[2])
a1_qxl = float(a1_sp[2])
a5_qxl = float(a5_sp[2])
a10_qxl = float(a10_sp[2])
a15_qxl = float(a15_sp[2])
a20_qxl = float(a20_sp[2])
a25_qxl = float(a25_sp[2])
a30_qxl = float(a30_sp[2])
a35_qxl = float(a35_sp[2])
a40_qxl = float(a40_sp[2])
a45_qxl = float(a45_sp[2])
a50_qxl = float(a50_sp[2])
a55_qxl = float(a55_sp[2])
a60_qxl = float(a60_sp[2])
a65_qxl = float(a65_sp[2])
a70_qxl = float(a70_sp[2])
a75_qxl = float(a75_sp[2])
a80_qxl = float(a80_sp[2])
a85_qxl = float(a85_sp[2])
a90_qxl = float(a90_sp[2])
a95_qxl = float(a95_sp[2])
a100_qxl = float(a100_sp[2])
```

```
# qx - Upper bound
```

```
a0_qxu = float(a0_sp[3])
a1_qxu = float(a1_sp[3])
a5_qxu = float(a5_sp[3])
a10_qxu = float(a10_sp[3])
a15_qxu = float(a15_sp[3])
a20_qxu = float(a20_sp[3])
a25_qxu = float(a25_sp[3])
a30_qxu = float(a30_sp[3])
a35_qxu = float(a35_sp[3])
a40_qxu = float(a40_sp[3])
a45_qxu = float(a45_sp[3])
a50_qxu = float(a50_sp[3])
a55_qxu = float(a55_sp[3])
a60_qxu = float(a60_sp[3])
a65_qxu = float(a65_sp[3])
a70_qxu = float(a70_sp[3])
a75_qxu = float(a75_sp[3])
a80_qxu = float(a80_sp[3])
a85_qxu = float(a85_sp[3])
a90_qxu = float(a90_sp[3])
```

```
a95_qxu = float(a95_sp[3])
a100_qxu = float(a100_sp[3])
```

```
# ax
```

```
a0_ax = float(a0_sp[4])
a1_ax = float(a1_sp[4])
a5_ax = float(a5_sp[4])
a10_ax = float(a10_sp[4])
a15_ax = float(a15_sp[4])
a20_ax = float(a20_sp[4])
a25_ax = float(a25_sp[4])
a30_ax = float(a30_sp[4])
a35_ax = float(a35_sp[4])
a40_ax = float(a40_sp[4])
a45_ax = float(a45_sp[4])
a50_ax = float(a50_sp[4])
a55_ax = float(a55_sp[4])
a60_ax = float(a60_sp[4])
a65_ax = float(a65_sp[4])
a70_ax = float(a70_sp[4])
a75_ax = float(a75_sp[4])
a80_ax = float(a80_sp[4])
a85_ax = float(a85_sp[4])
a90_ax = float(a90_sp[4])
a95_ax = float(a95_sp[4])
a100_ax = float(a100_sp[4])
```

```
# ax - LB
```

```
a0_axl = float(a0_sp[5])
a1_axl = float(a1_sp[5])
a5_axl = float(a5_sp[5])
a10_axl = float(a10_sp[5])
a15_axl = float(a15_sp[5])
a20_axl = float(a20_sp[5])
a25_axl = float(a25_sp[5])
a30_axl = float(a30_sp[5])
a35_axl = float(a35_sp[5])
a40_axl = float(a40_sp[5])
a45_axl = float(a45_sp[5])
a50_axl = float(a50_sp[5])
a55_axl = float(a55_sp[5])
a60_axl = float(a60_sp[5])
a65_axl = float(a65_sp[5])
a70_axl = float(a70_sp[5])
a75_axl = float(a75_sp[5])
a80_axl = float(a80_sp[5])
a85_axl = float(a85_sp[5])
a90_axl = float(a90_sp[5])
a95_axl = float(a95_sp[5])
a100_axl = float(a100_sp[5])
```

```

# ax - UB
a0_axu = float(a0_sp[6])
a1_axu = float(a1_sp[6])
a5_axu = float(a5_sp[6])
a10_axu = float(a10_sp[6])
a15_axu = float(a15_sp[6])
a20_axu = float(a20_sp[6])
a25_axu = float(a25_sp[6])
a30_axu = float(a30_sp[6])
a35_axu = float(a35_sp[6])
a40_axu = float(a40_sp[6])
a45_axu = float(a45_sp[6])
a50_axu = float(a50_sp[6])
a55_axu = float(a55_sp[6])
a60_axu = float(a60_sp[6])
a65_axu = float(a65_sp[6])
a70_axu = float(a70_sp[6])
a75_axu = float(a75_sp[6])
a80_axu = float(a80_sp[6])
a85_axu = float(a85_sp[6])
a90_axu = float(a90_sp[6])
a95_axu = float(a95_sp[6])
a100_axu = float(a100_sp[6])

count = 0
while count < 50000: #5000: #50000

# Random qx by age - need to check we are not getting any values below zero

# make this uniform
a0_rand_qx = random.uniform(a0_qxl,a0_qxu)
a1_rand_qx = random.uniform(a1_qxl,a1_qxu)
a5_rand_qx = random.uniform(a5_qxl,a5_qxu)
a10_rand_qx = random.uniform(a10_qxl,a10_qxu)
a15_rand_qx = random.uniform(a15_qxl,a15_qxu)
a20_rand_qx = random.uniform(a20_qxl,a20_qxu)
a25_rand_qx = random.uniform(a25_qxl,a25_qxu)
a30_rand_qx = random.uniform(a30_qxl,a30_qxu)
a35_rand_qx = random.uniform(a35_qxl,a35_qxu)
a40_rand_qx = random.uniform(a40_qxl,a40_qxu)
a45_rand_qx = random.uniform(a45_qxl,a45_qxu)
a50_rand_qx = random.uniform(a50_qxl,a50_qxu)
a55_rand_qx = random.uniform(a55_qxl,a55_qxu)
a60_rand_qx = random.uniform(a60_qxl,a60_qxu)
a65_rand_qx = random.uniform(a65_qxl,a65_qxu)
a70_rand_qx = random.uniform(a70_qxl,a70_qxu)
a75_rand_qx = random.uniform(a75_qxl,a75_qxu)
a80_rand_qx = random.uniform(a80_qxl,a80_qxu)
a85_rand_qx = random.uniform(a85_qxl,a85_qxu)
a90_rand_qx = random.uniform(a90_qxl,a90_qxu)
a95_rand_qx = random.uniform(a95_qxl,a95_qxu)
a100_rand_qx = 1

```

```
# Random ax by age - need to check we are not getting any values below zero
```

```
# make this uniform
```

```
a0_rand_ax = random.uniform(a0_axl,a0_axu)
a1_rand_ax = random.uniform(a1_axl,a1_axu)
a5_rand_ax = random.uniform(a5_axl,a5_axu)
a10_rand_ax = random.uniform(a10_axl,a10_axu)
a15_rand_ax = random.uniform(a15_axl,a15_axu)
a20_rand_ax = random.uniform(a20_axl,a20_axu)
a25_rand_ax = random.uniform(a25_axl,a25_axu)
a30_rand_ax = random.uniform(a30_axl,a30_axu)
a35_rand_ax = random.uniform(a35_axl,a35_axu)
a40_rand_ax = random.uniform(a40_axl,a40_axu)
a45_rand_ax = random.uniform(a45_axl,a45_axu)
a50_rand_ax = random.uniform(a50_axl,a50_axu)
a55_rand_ax = random.uniform(a55_axl,a55_axu)
a60_rand_ax = random.uniform(a60_axl,a60_axu)
a65_rand_ax = random.uniform(a65_axl,a65_axu)
a70_rand_ax = random.uniform(a70_axl,a70_axu)
a75_rand_ax = random.uniform(a75_axl,a75_axu)
a80_rand_ax = random.uniform(a80_axl,a80_axu)
a85_rand_ax = random.uniform(a85_axl,a85_axu)
a90_rand_ax = random.uniform(a90_axl,a90_axu)
a95_rand_ax = random.uniform(a95_axl,a95_axu)
a100_rand_ax = random.uniform(a100_axl,a100_axu)
```

```
### calculate life table variables
```

```
radix = 1000000.0000000
```

```
# calculate the number of deaths age0
```

```
a0_dx = a0_rand_qx*radix
```

```
# calculate survivors
```

```
a0_lx=radix
```

```
a0_sx=a0_lx/radix # this is 1?
```

```
a1_lx=(radix-a0_dx)
```

```
a1_sx = a1_lx/radix
```

```
# calculate the number of deaths age1
```

```
a1_dx = a1_rand_qx*a1_lx
```

```
# calculate survivors
```

```
a5_lx=(a1_lx-a1_dx)
```

```
a5_sx = a5_lx/radix
```

```
# calculate the number of deaths age5
```

```
a5_dx = a5_rand_qx*a5_lx
```

```
# calculate survivors
```

```
a10_lx=(a5_lx-a5_dx)
```

```
a10_sx = a10_lx/radix
```

```
# calculate the number of deaths age10
```

```

a10_dx = a10_rand_qx*a10_lx
# calculate survivors
a15_lx=(a10_lx-a10_dx)
a15_sx = a15_lx/radix

# calculate the number of deaths age15
a15_dx = a15_rand_qx*a15_lx
# calculate survivors
a20_lx=(a15_lx-a15_dx)
a20_sx = a20_lx/radix

# calculate the number of deaths age20
a20_dx = a20_rand_qx*a20_lx
# calculate survivors
a25_lx=(a20_lx-a20_dx)
a25_sx = a25_lx/radix

# calculate the number of deaths age25
a25_dx = a25_rand_qx*a25_lx
# calculate survivors
a30_lx=(a25_lx-a25_dx)
a30_sx = a30_lx/radix

# calculate the number of deaths age30
a30_dx = a30_rand_qx*a30_lx
# calculate survivors
a35_lx=(a30_lx-a30_dx)
a35_sx = a35_lx/radix

# calculate the number of deaths age35
a35_dx = a35_rand_qx*a35_lx
# calculate survivors
a40_lx=(a35_lx-a35_dx)
a40_sx = a40_lx/radix

# calculate the number of deaths age40
a40_dx = a40_rand_qx*a40_lx
# calculate survivors
a45_lx=(a40_lx-a40_dx)
a45_sx = a45_lx/radix

# calculate the number of deaths age45
a45_dx = a45_rand_qx*a45_lx
# calculate survivors
a50_lx=(a45_lx-a45_dx)
a50_sx = a50_lx/radix

# calculate the number of deaths age50
a50_dx = a50_rand_qx*a50_lx
# calculate survivors
a55_lx=(a50_lx-a50_dx)
a55_sx = a55_lx/radix

```

```
# calculate the number of deaths age55
a55_dx = a55_rand_qx*a55_lx
# calculate survivors
a60_lx=(a55_lx-a55_dx)
a60_sx = a60_lx/radix
```

```
# calculate the number of deaths age60
a60_dx = a60_rand_qx*a60_lx
# calculate survivors
a65_lx=(a60_lx-a60_dx)
a65_sx = a65_lx/radix
```

```
# calculate the number of deaths age65
a65_dx = a65_rand_qx*a65_lx
# calculate survivors
a70_lx=(a65_lx-a65_dx)
a70_sx = a70_lx/radix
```

```
# calculate the number of deaths age70
a70_dx = a70_rand_qx*a70_lx
# calculate survivors
a75_lx=(a70_lx-a70_dx)
a75_sx = a75_lx/radix
```

```
# calculate the number of deaths age75
a75_dx = a75_rand_qx*a75_lx
# calculate survivors
a80_lx=(a75_lx-a75_dx)
a80_sx = a80_lx/radix
```

```
# calculate the number of deaths age80
a80_dx = a80_rand_qx*a80_lx
# calculate survivors
a85_lx=(a80_lx-a80_dx)
a85_sx = a85_lx/radix
```

```
# calculate the number of deaths age85
a85_dx = a85_rand_qx*a85_lx
# calculate survivors
a90_lx=(a85_lx-a85_dx)
a90_sx = a90_lx/radix
```

```
# calculate the number of deaths age90
a90_dx = a90_rand_qx*a90_lx
# calculate survivors
a95_lx=(a90_lx-a90_dx)
a95_sx = a95_lx/radix
```

```
# calculate the number of deaths age95
a95_dx = a95_rand_qx*a95_lx
# calculate survivors
a100_lx=(a95_lx-a95_dx)
a100_sx = a100_lx/radix
```



```
# calculate the number of deaths age100
```

```
a100_dx = a100_rand_qx*a100_lx
```

```
# No Survivors - top-coded
```

```
#calculate Lx
```

```
a0_Lx = (a1_lx*1)+(a0_dx*a0_rand_ax)
```

```
a1_Lx = (a5_lx*4)+(a1_dx*a1_rand_ax)
```

```
a5_Lx = (a10_lx*5)+(a5_dx*a5_rand_ax)
```

```
a10_Lx = (a15_lx*5)+(a10_dx*a10_rand_ax)
```

```
a15_Lx = (a20_lx*5)+(a15_dx*a15_rand_ax)
```

```
a20_Lx = (a25_lx*5)+(a20_dx*a20_rand_ax)
```

```
a25_Lx = (a30_lx*5)+(a25_dx*a25_rand_ax)
```

```
a30_Lx = (a35_lx*5)+(a30_dx*a30_rand_ax)
```

```
a35_Lx = (a40_lx*5)+(a35_dx*a35_rand_ax)
```

```
a40_Lx = (a45_lx*5)+(a40_dx*a40_rand_ax)
```

```
a45_Lx = (a50_lx*5)+(a45_dx*a45_rand_ax)
```

```
a50_Lx = (a55_lx*5)+(a50_dx*a50_rand_ax)
```

```
a55_Lx = (a60_lx*5)+(a55_dx*a55_rand_ax)
```

```
a60_Lx = (a65_lx*5)+(a60_dx*a60_rand_ax)
```

```
a65_Lx = (a70_lx*5)+(a65_dx*a65_rand_ax)
```

```
a70_Lx = (a75_lx*5)+(a70_dx*a70_rand_ax)
```

```
a75_Lx = (a80_lx*5)+(a75_dx*a75_rand_ax)
```

```
a80_Lx = (a85_lx*5)+(a80_dx*a80_rand_ax)
```

```
a85_Lx = (a90_lx*5)+(a85_dx*a85_rand_ax)
```

```
a90_Lx = (a95_lx*5)+(a90_dx*a90_rand_ax)
```

```
a95_Lx = (a100_lx*5)+(a95_dx*a95_rand_ax)
```

```
a100_Lx = (a100_dx*a100_rand_ax)
```

```
#####
```

```
# calculate Tx
```

```
a0_Tx =
```

```
a0_Lx+a1_Lx+a5_Lx+a10_Lx+a15_Lx+a20_Lx+a25_Lx+a30_Lx+a35_Lx+a40_Lx+a45_Lx+a50_Lx+a55_Lx+a60_Lx+  
a65_Lx+a70_Lx+a75_Lx+a80_Lx+a85_Lx+a90_Lx+a95_Lx+a100_Lx
```

```
a1_Tx =
```

```
a1_Lx+a5_Lx+a10_Lx+a15_Lx+a20_Lx+a25_Lx+a30_Lx+a35_Lx+a40_Lx+a45_Lx+a50_Lx+a55_Lx+a60_Lx+a65_Lx  
+a70_Lx+a75_Lx+a80_Lx+a85_Lx+a90_Lx+a95_Lx+a100_Lx
```

```
a5_Tx =
```

```
a5_Lx+a10_Lx+a15_Lx+a20_Lx+a25_Lx+a30_Lx+a35_Lx+a40_Lx+a45_Lx+a50_Lx+a55_Lx+a60_Lx+a65_Lx+a70_L  
x+a75_Lx+a80_Lx+a85_Lx+a90_Lx+a95_Lx+a100_Lx
```

```
a10_Tx =
```

```
a10_Lx+a15_Lx+a20_Lx+a25_Lx+a30_Lx+a35_Lx+a40_Lx+a45_Lx+a50_Lx+a55_Lx+a60_Lx+a65_Lx+a70_Lx+a75_L  
x+a80_Lx+a85_Lx+a90_Lx+a95_Lx+a100_Lx
```

```
a15_Tx =
```

```
a15_Lx+a20_Lx+a25_Lx+a30_Lx+a35_Lx+a40_Lx+a45_Lx+a50_Lx+a55_Lx+a60_Lx+a65_Lx+a70_Lx+a75_Lx+a80_L  
x+a85_Lx+a90_Lx+a95_Lx+a100_Lx
```

```
a20_Tx =
```

```
a20_Lx+a25_Lx+a30_Lx+a35_Lx+a40_Lx+a45_Lx+a50_Lx+a55_Lx+a60_Lx+a65_Lx+a70_Lx+a75_Lx+a80_Lx+a85_L  
x+a90_Lx+a95_Lx+a100_Lx
```

```
a25_Tx =
```

```
a25_Lx+a30_Lx+a35_Lx+a40_Lx+a45_Lx+a50_Lx+a55_Lx+a60_Lx+a65_Lx+a70_Lx+a75_Lx+a80_Lx+a85_Lx+a90_L  
x+a95_Lx+a100_Lx
```

```

a30_Tx =
a30_Lx+a35_Lx+a40_Lx+a45_Lx+a50_Lx+a55_Lx+a60_Lx+a65_Lx+a70_Lx+a75_Lx+a80_Lx+a85_Lx+a90_Lx+a95_
Lx+a100_Lx
a35_Tx =
a35_Lx+a40_Lx+a45_Lx+a50_Lx+a55_Lx+a60_Lx+a65_Lx+a70_Lx+a75_Lx+a80_Lx+a85_Lx+a90_Lx+a95_Lx+a100
_Lx
a40_Tx =
a40_Lx+a45_Lx+a50_Lx+a55_Lx+a60_Lx+a65_Lx+a70_Lx+a75_Lx+a80_Lx+a85_Lx+a90_Lx+a95_Lx+a100_Lx
a45_Tx = a45_Lx+a50_Lx+a55_Lx+a60_Lx+a65_Lx+a70_Lx+a75_Lx+a80_Lx+a85_Lx+a90_Lx+a95_Lx+a100_Lx
a50_Tx = a50_Lx+a55_Lx+a60_Lx+a65_Lx+a70_Lx+a75_Lx+a80_Lx+a85_Lx+a90_Lx+a95_Lx+a100_Lx
a55_Tx = a55_Lx+a60_Lx+a65_Lx+a70_Lx+a75_Lx+a80_Lx+a85_Lx+a90_Lx+a95_Lx+a100_Lx
a60_Tx = a60_Lx+a65_Lx+a70_Lx+a75_Lx+a80_Lx+a85_Lx+a90_Lx+a95_Lx+a100_Lx
a65_Tx = a65_Lx+a70_Lx+a75_Lx+a80_Lx+a85_Lx+a90_Lx+a95_Lx+a100_Lx
a70_Tx = a70_Lx+a75_Lx+a80_Lx+a85_Lx+a90_Lx+a95_Lx+a100_Lx
a75_Tx = a75_Lx+a80_Lx+a85_Lx+a90_Lx+a95_Lx+a100_Lx
a80_Tx = a80_Lx+a85_Lx+a90_Lx+a95_Lx+a100_Lx
a85_Tx = a85_Lx+a90_Lx+a95_Lx+a100_Lx
a90_Tx = a90_Lx+a95_Lx+a100_Lx
a95_Tx = a95_Lx+a100_Lx
a100_Tx = a100_Lx

```

##### estimate qx: 15-64, 65-84, 85-94

```

a1564_qx = (a15_dx+a20_dx+a25_dx+a30_dx+a35_dx+a40_dx+a45_dx+a50_dx+a55_dx+a60_dx)/a15_lx
a6584_qx = (a65_dx+a70_dx+a75_dx+a80_dx)/a65_lx
a8594_qx = (a85_dx+a90_dx)/a85_lx

```

##### estimate life expectancy

```

#calculate ex
a0_ex = a0_Tx/radix
a1_ex = a1_Tx/a1_lx
a5_ex = a5_Tx/a5_lx
a10_ex = a10_Tx/a10_lx
a15_ex = a15_Tx/a15_lx
a20_ex = a20_Tx/a20_lx
a25_ex = a25_Tx/a25_lx
a30_ex = a30_Tx/a30_lx
a35_ex = a35_Tx/a35_lx
a40_ex = a40_Tx/a40_lx
a45_ex = a45_Tx/a45_lx
a50_ex = a50_Tx/a50_lx
a55_ex = a55_Tx/a55_lx
a60_ex = a60_Tx/a60_lx
a65_ex = a65_Tx/a65_lx
a70_ex = a70_Tx/a70_lx
a75_ex = a75_Tx/a75_lx
a80_ex = a80_Tx/a80_lx
a85_ex = a85_Tx/a85_lx
a90_ex = a90_Tx/a90_lx
a95_ex = a95_Tx/a95_lx
a100_ex = a100_Tx/a100_lx

```

```

# save data

tot_file_name = r"/Users/ryan/Documents/Papers/LE Trends_COVID/2021 Life
Expectancy/simulations/peer/male/deu_m_ex.txt"

tot_opened_file = open(tot_file_name, 'a')

if count==0:
    tot_opened_file.write('{0} {1} {2} {3}\n'.format("sim_num", "age", "sx", "ex"))
    tot_opened_file.write('{0} {1} {2} {3}\n'.format(count,"0",a0_sx,a0_ex))
    tot_opened_file.write('{0} {1} {2} {3}\n'.format(count,"1",a1_sx,a1_ex))
    tot_opened_file.write('{0} {1} {2} {3}\n'.format(count,"5",a5_sx,a5_ex))
    tot_opened_file.write('{0} {1} {2} {3}\n'.format(count,"10",a10_sx,a10_ex))
    tot_opened_file.write('{0} {1} {2} {3}\n'.format(count,"15",a15_sx,a15_ex))
    tot_opened_file.write('{0} {1} {2} {3}\n'.format(count,"20",a20_sx,a20_ex))
    tot_opened_file.write('{0} {1} {2} {3}\n'.format(count,"25",a25_sx,a25_ex))
    tot_opened_file.write('{0} {1} {2} {3}\n'.format(count,"30",a30_sx,a30_ex))
    tot_opened_file.write('{0} {1} {2} {3}\n'.format(count,"35",a35_sx,a35_ex))
    tot_opened_file.write('{0} {1} {2} {3}\n'.format(count,"40",a40_sx,a40_ex))
    tot_opened_file.write('{0} {1} {2} {3}\n'.format(count,"45",a45_sx,a45_ex))
    tot_opened_file.write('{0} {1} {2} {3}\n'.format(count,"50",a50_sx,a50_ex))
    tot_opened_file.write('{0} {1} {2} {3}\n'.format(count,"55",a55_sx,a55_ex))
    tot_opened_file.write('{0} {1} {2} {3}\n'.format(count,"60",a60_sx,a60_ex))
    tot_opened_file.write('{0} {1} {2} {3}\n'.format(count,"65",a65_sx,a65_ex))
    tot_opened_file.write('{0} {1} {2} {3}\n'.format(count,"70",a70_sx,a70_ex))
    tot_opened_file.write('{0} {1} {2} {3}\n'.format(count,"75",a75_sx,a75_ex))
    tot_opened_file.write('{0} {1} {2} {3}\n'.format(count,"80",a80_sx,a80_ex))
    tot_opened_file.write('{0} {1} {2} {3}\n'.format(count,"85",a85_sx,a85_ex))
    tot_opened_file.write('{0} {1} {2} {3}\n'.format(count,"90",a90_sx,a90_ex))
    tot_opened_file.write('{0} {1} {2} {3}\n'.format(count,"95",a95_sx,a95_ex))
    tot_opened_file.write('{0} {1} {2} {3}\n'.format(count,"100",a100_sx,a100_ex))

else:
    tot_opened_file.write('{0} {1} {2} {3}\n'.format(count,"0",a0_sx,a0_ex))
    tot_opened_file.write('{0} {1} {2} {3}\n'.format(count,"1",a1_sx,a1_ex))
    tot_opened_file.write('{0} {1} {2} {3}\n'.format(count,"5",a5_sx,a5_ex))
    tot_opened_file.write('{0} {1} {2} {3}\n'.format(count,"10",a10_sx,a10_ex))
    tot_opened_file.write('{0} {1} {2} {3}\n'.format(count,"15",a15_sx,a15_ex))
    tot_opened_file.write('{0} {1} {2} {3}\n'.format(count,"20",a20_sx,a20_ex))
    tot_opened_file.write('{0} {1} {2} {3}\n'.format(count,"25",a25_sx,a25_ex))
    tot_opened_file.write('{0} {1} {2} {3}\n'.format(count,"30",a30_sx,a30_ex))
    tot_opened_file.write('{0} {1} {2} {3}\n'.format(count,"35",a35_sx,a35_ex))
    tot_opened_file.write('{0} {1} {2} {3}\n'.format(count,"40",a40_sx,a40_ex))
    tot_opened_file.write('{0} {1} {2} {3}\n'.format(count,"45",a45_sx,a45_ex))
    tot_opened_file.write('{0} {1} {2} {3}\n'.format(count,"50",a50_sx,a50_ex))
    tot_opened_file.write('{0} {1} {2} {3}\n'.format(count,"55",a55_sx,a55_ex))
    tot_opened_file.write('{0} {1} {2} {3}\n'.format(count,"60",a60_sx,a60_ex))
    tot_opened_file.write('{0} {1} {2} {3}\n'.format(count,"65",a65_sx,a65_ex))
    tot_opened_file.write('{0} {1} {2} {3}\n'.format(count,"70",a70_sx,a70_ex))
    tot_opened_file.write('{0} {1} {2} {3}\n'.format(count,"75",a75_sx,a75_ex))
    tot_opened_file.write('{0} {1} {2} {3}\n'.format(count,"80",a80_sx,a80_ex))

```

```
tot_opened_file.write('{0} {1} {2} {3}\n'.format(count,"85",a85_sx,a85_ex))
tot_opened_file.write('{0} {1} {2} {3}\n'.format(count,"90",a90_sx,a90_ex))
tot_opened_file.write('{0} {1} {2} {3}\n'.format(count,"95",a95_sx,a95_ex))
tot_opened_file.write('{0} {1} {2} {3}\n'.format(count,"100",a100_sx,a100_ex))

print(count)
count += 1 # This is the same as count = count + 1

tot_opened_file.close()

print("simulation completed")
```

## **Spain Total Population, 2021**

```
# -*- coding: utf-8 -*-
"""
```

```
Created 3/31
```

```
Peer 2021 Life Tables from 2020 LT qx*2021:2020RR and 2020 ax
```

```
@author: ryan masters
```

```
"""
```

```
#import packages
import random
```

```
esp_t = r"/Users/ryan/Documents/Papers/LE Trends_COVID/2021 Life Expectancy/simulations/peer/total/esp_t.txt"
```

```

# read in the file
textFile = open(esp_t,'r')
text = textFile.readlines()
# split into different age categories
a0=text[1]
a1=text[2]
a5=text[3]
a10=text[4]
a15=text[5]
a20=text[6]
a25=text[7]
a30=text[8]
a35=text[9]
a40=text[10]
a45=text[11]
a50=text[12]
a55=text[13]
a60=text[14]
a65=text[15]
a70=text[16]
a75=text[17]
a80=text[18]
a85=text[19]
a90=text[20]
a95=text[21]
a100=text[22]
a105=text[23]
a110=text[24]

a0_sp = a0.split(",")
a1_sp = a1.split(",")
a5_sp = a5.split(",")
a10_sp = a10.split(",")
a15_sp = a15.split(",")
a20_sp = a20.split(",")
a25_sp = a25.split(",")
a30_sp = a30.split(",")
a35_sp = a35.split(",")
a40_sp = a40.split(",")
a45_sp = a45.split(",")
a50_sp = a50.split(",")
a55_sp = a55.split(",")
a60_sp = a60.split(",")
a65_sp = a65.split(",")
a70_sp = a70.split(",")
a75_sp = a75.split(",")
a80_sp = a80.split(",")
a85_sp = a85.split(",")
a90_sp = a90.split(",")
a95_sp = a95.split(",")
a100_sp = a100.split(",")
a105_sp = a105.split(",")

```

```
a110_sp = a110.split(",")
```

```
# qx
```

```
a0_qx = float(a0_sp[1])
```

```
a1_qx = float(a1_sp[1])
```

```
a5_qx = float(a5_sp[1])
```

```
a10_qx = float(a10_sp[1])
```

```
a15_qx = float(a15_sp[1])
```

```
a20_qx = float(a20_sp[1])
```

```
a25_qx = float(a25_sp[1])
```

```
a30_qx = float(a30_sp[1])
```

```
a35_qx = float(a35_sp[1])
```

```
a40_qx = float(a40_sp[1])
```

```
a45_qx = float(a45_sp[1])
```

```
a50_qx = float(a50_sp[1])
```

```
a55_qx = float(a55_sp[1])
```

```
a60_qx = float(a60_sp[1])
```

```
a65_qx = float(a65_sp[1])
```

```
a70_qx = float(a70_sp[1])
```

```
a75_qx = float(a75_sp[1])
```

```
a80_qx = float(a80_sp[1])
```

```
a85_qx = float(a85_sp[1])
```

```
a90_qx = float(a90_sp[1])
```

```
a95_qx = float(a95_sp[1])
```

```
a100_qx = float(a100_sp[1])
```

```
a105_qx = float(a105_sp[1])
```

```
a110_qx = float(a110_sp[1])
```

```
# qx - lower bound
```

```
a0_qxl = float(a0_sp[2])
```

```
a1_qxl = float(a1_sp[2])
```

```
a5_qxl = float(a5_sp[2])
```

```
a10_qxl = float(a10_sp[2])
```

```
a15_qxl = float(a15_sp[2])
```

```
a20_qxl = float(a20_sp[2])
```

```
a25_qxl = float(a25_sp[2])
```

```
a30_qxl = float(a30_sp[2])
```

```
a35_qxl = float(a35_sp[2])
```

```
a40_qxl = float(a40_sp[2])
```

```
a45_qxl = float(a45_sp[2])
```

```
a50_qxl = float(a50_sp[2])
```

```
a55_qxl = float(a55_sp[2])
```

```
a60_qxl = float(a60_sp[2])
```

```
a65_qxl = float(a65_sp[2])
```

```
a70_qxl = float(a70_sp[2])
```

```
a75_qxl = float(a75_sp[2])
```

```
a80_qxl = float(a80_sp[2])
```

```
a85_qxl = float(a85_sp[2])
```

```
a90_qxl = float(a90_sp[2])
```

```
a95_qxl = float(a95_sp[2])
```

```
a100_qxl = float(a100_sp[2])
```

```
a105_qxl = float(a105_sp[2])
```

```
a110_qxl = float(a110_sp[2])
```

```
# qx - Upper bound
a0_qxu = float(a0_sp[3])
a1_qxu = float(a1_sp[3])
a5_qxu = float(a5_sp[3])
a10_qxu = float(a10_sp[3])
a15_qxu = float(a15_sp[3])
a20_qxu = float(a20_sp[3])
a25_qxu = float(a25_sp[3])
a30_qxu = float(a30_sp[3])
a35_qxu = float(a35_sp[3])
a40_qxu = float(a40_sp[3])
a45_qxu = float(a45_sp[3])
a50_qxu = float(a50_sp[3])
a55_qxu = float(a55_sp[3])
a60_qxu = float(a60_sp[3])
a65_qxu = float(a65_sp[3])
a70_qxu = float(a70_sp[3])
a75_qxu = float(a75_sp[3])
a80_qxu = float(a80_sp[3])
a85_qxu = float(a85_sp[3])
a90_qxu = float(a90_sp[3])
a95_qxu = float(a95_sp[3])
a100_qxu = float(a100_sp[3])
a105_qxu = float(a105_sp[3])
a110_qxu = float(a110_sp[3])
```

```
# ax
a0_ax = float(a0_sp[4])
a1_ax = float(a1_sp[4])
a5_ax = float(a5_sp[4])
a10_ax = float(a10_sp[4])
a15_ax = float(a15_sp[4])
a20_ax = float(a20_sp[4])
a25_ax = float(a25_sp[4])
a30_ax = float(a30_sp[4])
a35_ax = float(a35_sp[4])
a40_ax = float(a40_sp[4])
a45_ax = float(a45_sp[4])
a50_ax = float(a50_sp[4])
a55_ax = float(a55_sp[4])
a60_ax = float(a60_sp[4])
a65_ax = float(a65_sp[4])
a70_ax = float(a70_sp[4])
a75_ax = float(a75_sp[4])
a80_ax = float(a80_sp[4])
a85_ax = float(a85_sp[4])
a90_ax = float(a90_sp[4])
a95_ax = float(a95_sp[4])
a100_ax = float(a100_sp[4])
a105_ax = float(a105_sp[4])
a110_ax = float(a110_sp[4])
```

```
# ax - LB
```

```
a0_axl = float(a0_sp[5])
a1_axl = float(a1_sp[5])
a5_axl = float(a5_sp[5])
a10_axl = float(a10_sp[5])
a15_axl = float(a15_sp[5])
a20_axl = float(a20_sp[5])
a25_axl = float(a25_sp[5])
a30_axl = float(a30_sp[5])
a35_axl = float(a35_sp[5])
a40_axl = float(a40_sp[5])
a45_axl = float(a45_sp[5])
a50_axl = float(a50_sp[5])
a55_axl = float(a55_sp[5])
a60_axl = float(a60_sp[5])
a65_axl = float(a65_sp[5])
a70_axl = float(a70_sp[5])
a75_axl = float(a75_sp[5])
a80_axl = float(a80_sp[5])
a85_axl = float(a85_sp[5])
a90_axl = float(a90_sp[5])
a95_axl = float(a95_sp[5])
a100_axl = float(a100_sp[5])
a105_axl = float(a105_sp[5])
a110_axl = float(a110_sp[5])
```

```
# ax - UB
```

```
a0_axu = float(a0_sp[6])
a1_axu = float(a1_sp[6])
a5_axu = float(a5_sp[6])
a10_axu = float(a10_sp[6])
a15_axu = float(a15_sp[6])
a20_axu = float(a20_sp[6])
a25_axu = float(a25_sp[6])
a30_axu = float(a30_sp[6])
a35_axu = float(a35_sp[6])
a40_axu = float(a40_sp[6])
a45_axu = float(a45_sp[6])
a50_axu = float(a50_sp[6])
a55_axu = float(a55_sp[6])
a60_axu = float(a60_sp[6])
a65_axu = float(a65_sp[6])
a70_axu = float(a70_sp[6])
a75_axu = float(a75_sp[6])
a80_axu = float(a80_sp[6])
a85_axu = float(a85_sp[6])
a90_axu = float(a90_sp[6])
a95_axu = float(a95_sp[6])
a100_axu = float(a100_sp[6])
a105_axu = float(a105_sp[6])
a110_axu = float(a110_sp[6])
```

```
count = 0
while count < 50000: #5000: #50000
```



```

# uniform dist
a0_rand_qx = random.uniform(a0_qxl,a0_qxu)
a1_rand_qx = random.uniform(a1_qxl,a1_qxu)
a5_rand_qx = random.uniform(a5_qxl,a5_qxu)
a10_rand_qx = random.uniform(a10_qxl,a10_qxu)
a15_rand_qx = random.uniform(a15_qxl,a15_qxu)
a20_rand_qx = random.uniform(a20_qxl,a20_qxu)
a25_rand_qx = random.uniform(a25_qxl,a25_qxu)
a30_rand_qx = random.uniform(a30_qxl,a30_qxu)
a35_rand_qx = random.uniform(a35_qxl,a35_qxu)
a40_rand_qx = random.uniform(a40_qxl,a40_qxu)
a45_rand_qx = random.uniform(a45_qxl,a45_qxu)
a50_rand_qx = random.uniform(a50_qxl,a50_qxu)
a55_rand_qx = random.uniform(a55_qxl,a55_qxu)
a60_rand_qx = random.uniform(a60_qxl,a60_qxu)
a65_rand_qx = random.uniform(a65_qxl,a65_qxu)
a70_rand_qx = random.uniform(a70_qxl,a70_qxu)
a75_rand_qx = random.uniform(a75_qxl,a75_qxu)
a80_rand_qx = random.uniform(a80_qxl,a80_qxu)
a85_rand_qx = random.uniform(a85_qxl,a85_qxu)
a90_rand_qx = random.uniform(a90_qxl,a90_qxu)
a95_rand_qx = random.uniform(a95_qxl,a95_qxu)
a100_rand_qx = random.uniform(a100_qxl,a100_qxu)
a105_rand_qx = random.uniform(a105_qxl,a105_qxu)
a110_rand_qx = 1

# Random ax by age - need to check we are not getting any values below zero

# make this uniform
a0_rand_ax = random.uniform(a0_axl,a0_axu)
a1_rand_ax = random.uniform(a1_axl,a1_axu)
a5_rand_ax = random.uniform(a5_axl,a5_axu)
a10_rand_ax = random.uniform(a10_axl,a10_axu)
a15_rand_ax = random.uniform(a15_axl,a15_axu)
a20_rand_ax = random.uniform(a20_axl,a20_axu)
a25_rand_ax = random.uniform(a25_axl,a25_axu)
a30_rand_ax = random.uniform(a30_axl,a30_axu)
a35_rand_ax = random.uniform(a35_axl,a35_axu)
a40_rand_ax = random.uniform(a40_axl,a40_axu)
a45_rand_ax = random.uniform(a45_axl,a45_axu)
a50_rand_ax = random.uniform(a50_axl,a50_axu)
a55_rand_ax = random.uniform(a55_axl,a55_axu)
a60_rand_ax = random.uniform(a60_axl,a60_axu)
a65_rand_ax = random.uniform(a65_axl,a65_axu)
a70_rand_ax = random.uniform(a70_axl,a70_axu)
a75_rand_ax = random.uniform(a75_axl,a75_axu)
a80_rand_ax = random.uniform(a80_axl,a80_axu)
a85_rand_ax = random.uniform(a85_axl,a85_axu)
a90_rand_ax = random.uniform(a90_axl,a90_axu)
a95_rand_ax = random.uniform(a95_axl,a95_axu)
a100_rand_ax = random.uniform(a100_axl,a100_axu)
a105_rand_ax = random.uniform(a105_axl,a105_axu)

```

```

a110_rand_ax = random.uniform(a105_axl,a105_axu)

### calculate life table variables
radix = 1000000.0000000

# calculate the number of deaths age0
a0_dx = a0_rand_qx*radix
# calculate survivors
a0_lx=radix
a0_sx=a0_lx/radix # this is 1?
a1_lx=(radix-a0_dx)
a1_sx = a1_lx/radix

# calculate the number of deaths age1
a1_dx = a1_rand_qx*a1_lx
# calculate survivors
a5_lx=(a1_lx-a1_dx)
a5_sx = a5_lx/radix

# calculate the number of deaths age5
a5_dx = a5_rand_qx*a5_lx
# calculate survivors
a10_lx=(a5_lx-a5_dx)
a10_sx = a10_lx/radix

# calculate the number of deaths age10
a10_dx = a10_rand_qx*a10_lx
# calculate survivors
a15_lx=(a10_lx-a10_dx)
a15_sx = a15_lx/radix

# calculate the number of deaths age15
a15_dx = a15_rand_qx*a15_lx
# calculate survivors
a20_lx=(a15_lx-a15_dx)
a20_sx = a20_lx/radix

# calculate the number of deaths age20
a20_dx = a20_rand_qx*a20_lx
# calculate survivors
a25_lx=(a20_lx-a20_dx)
a25_sx = a25_lx/radix

# calculate the number of deaths age25
a25_dx = a25_rand_qx*a25_lx
# calculate survivors
a30_lx=(a25_lx-a25_dx)
a30_sx = a30_lx/radix

# calculate the number of deaths age30
a30_dx = a30_rand_qx*a30_lx
# calculate survivors
a35_lx=(a30_lx-a30_dx)

```

```

a35_sx = a35_lx/radix

# calculate the number of deaths age35
a35_dx = a35_rand_qx*a35_lx
# calculate survivors
a40_lx=(a35_lx-a35_dx)
a40_sx = a40_lx/radix

# calculate the number of deaths age40
a40_dx = a40_rand_qx*a40_lx
# calculate survivors
a45_lx=(a40_lx-a40_dx)
a45_sx = a45_lx/radix

# calculate the number of deaths age45
a45_dx = a45_rand_qx*a45_lx
# calculate survivors
a50_lx=(a45_lx-a45_dx)
a50_sx = a50_lx/radix

# calculate the number of deaths age50
a50_dx = a50_rand_qx*a50_lx
# calculate survivors
a55_lx=(a50_lx-a50_dx)
a55_sx = a55_lx/radix

# calculate the number of deaths age55
a55_dx = a55_rand_qx*a55_lx
# calculate survivors
a60_lx=(a55_lx-a55_dx)
a60_sx = a60_lx/radix

# calculate the number of deaths age60
a60_dx = a60_rand_qx*a60_lx
# calculate survivors
a65_lx=(a60_lx-a60_dx)
a65_sx = a65_lx/radix

# calculate the number of deaths age65
a65_dx = a65_rand_qx*a65_lx
# calculate survivors
a70_lx=(a65_lx-a65_dx)
a70_sx = a70_lx/radix

# calculate the number of deaths age70
a70_dx = a70_rand_qx*a70_lx
# calculate survivors
a75_lx=(a70_lx-a70_dx)
a75_sx = a75_lx/radix

# calculate the number of deaths age75
a75_dx = a75_rand_qx*a75_lx
# calculate survivors

```

```

a80_lx=(a75_lx-a75_dx)
a80_sx = a80_lx/radix

# calculate the number of deaths age80
a80_dx = a80_rand_qx*a80_lx
# calculate survivors
a85_lx=(a80_lx-a80_dx)
a85_sx = a85_lx/radix

# calculate the number of deaths age85
a85_dx = a85_rand_qx*a85_lx
# calculate survivors
a90_lx=(a85_lx-a85_dx)
a90_sx = a90_lx/radix

# calculate the number of deaths age90
a90_dx = a90_rand_qx*a90_lx
# calculate survivors
a95_lx=(a90_lx-a90_dx)
a95_sx = a95_lx/radix

# calculate the number of deaths age95
a95_dx = a95_rand_qx*a95_lx
# calculate survivors
a100_lx=(a95_lx-a95_dx)
a100_sx = a100_lx/radix

# calculate the number of deaths age100
a100_dx = a100_rand_qx*a100_lx
# calculate survivors
a105_lx=(a100_lx-a100_dx)
a105_sx = a105_lx/radix

# calculate the number of deaths age105
a105_dx = a105_rand_qx*a105_lx
# calculate survivors
a110_lx=(a105_lx-a105_dx)
a110_sx = a110_lx/radix

# calculate the number of deaths age110
a110_dx = a110_rand_qx*a110_lx
# No Survivors - top-coded

#calculate Lx
a0_Lx = (a1_lx*1)+(a0_dx*a0_rand_ax)
a1_Lx = (a5_lx*4)+(a1_dx*a1_rand_ax)
a5_Lx = (a10_lx*5)+(a5_dx*a5_rand_ax)
a10_Lx = (a15_lx*5)+(a10_dx*a10_rand_ax)
a15_Lx = (a20_lx*5)+(a15_dx*a15_rand_ax)
a20_Lx = (a25_lx*5)+(a20_dx*a20_rand_ax)
a25_Lx = (a30_lx*5)+(a25_dx*a25_rand_ax)
a30_Lx = (a35_lx*5)+(a30_dx*a30_rand_ax)
a35_Lx = (a40_lx*5)+(a35_dx*a35_rand_ax)

```

```

a40_Lx = (a45_lx*5)+(a40_dx*a40_rand_ax)
a45_Lx = (a50_lx*5)+(a45_dx*a45_rand_ax)
a50_Lx = (a55_lx*5)+(a50_dx*a50_rand_ax)
a55_Lx = (a60_lx*5)+(a55_dx*a55_rand_ax)
a60_Lx = (a65_lx*5)+(a60_dx*a60_rand_ax)
a65_Lx = (a70_lx*5)+(a65_dx*a65_rand_ax)
a70_Lx = (a75_lx*5)+(a70_dx*a70_rand_ax)
a75_Lx = (a80_lx*5)+(a75_dx*a75_rand_ax)
a80_Lx = (a85_lx*5)+(a80_dx*a80_rand_ax)
a85_Lx = (a90_lx*5)+(a85_dx*a85_rand_ax)
a90_Lx = (a95_lx*5)+(a90_dx*a90_rand_ax)
a95_Lx = (a100_lx*5)+(a95_dx*a95_rand_ax)
a100_Lx = (a105_lx*5)+(a100_dx*a100_rand_ax)
a105_Lx = (a110_lx*5)+(a105_dx*a105_rand_ax)
a110_Lx = (a110_dx*a110_rand_ax)

```

```
# calculate Tx
```

```

a0_Tx =
a0_Lx+a1_Lx+a5_Lx+a10_Lx+a15_Lx+a20_Lx+a25_Lx+a30_Lx+a35_Lx+a40_Lx+a45_Lx+a50_Lx+a55_Lx+a60_Lx+
a65_Lx+a70_Lx+a75_Lx+a80_Lx+a85_Lx+a90_Lx+a95_Lx+a100_Lx+a105_Lx+a110_Lx
a1_Tx =
a1_Lx+a5_Lx+a10_Lx+a15_Lx+a20_Lx+a25_Lx+a30_Lx+a35_Lx+a40_Lx+a45_Lx+a50_Lx+a55_Lx+a60_Lx+a65_Lx
+a70_Lx+a75_Lx+a80_Lx+a85_Lx+a90_Lx+a95_Lx+a100_Lx+a105_Lx+a110_Lx
a5_Tx =
a5_Lx+a10_Lx+a15_Lx+a20_Lx+a25_Lx+a30_Lx+a35_Lx+a40_Lx+a45_Lx+a50_Lx+a55_Lx+a60_Lx+a65_Lx+a70_L
x+a75_Lx+a80_Lx+a85_Lx+a90_Lx+a95_Lx+a100_Lx+a105_Lx+a110_Lx
a10_Tx =
a10_Lx+a15_Lx+a20_Lx+a25_Lx+a30_Lx+a35_Lx+a40_Lx+a45_Lx+a50_Lx+a55_Lx+a60_Lx+a65_Lx+a70_Lx+a75_
Lx+a80_Lx+a85_Lx+a90_Lx+a95_Lx+a100_Lx+a105_Lx+a110_Lx
a15_Tx =
a15_Lx+a20_Lx+a25_Lx+a30_Lx+a35_Lx+a40_Lx+a45_Lx+a50_Lx+a55_Lx+a60_Lx+a65_Lx+a70_Lx+a75_Lx+a80_
Lx+a85_Lx+a90_Lx+a95_Lx+a100_Lx+a105_Lx+a110_Lx
a20_Tx =
a20_Lx+a25_Lx+a30_Lx+a35_Lx+a40_Lx+a45_Lx+a50_Lx+a55_Lx+a60_Lx+a65_Lx+a70_Lx+a75_Lx+a80_Lx+a85_
Lx+a90_Lx+a95_Lx+a100_Lx+a105_Lx+a110_Lx
a25_Tx =
a25_Lx+a30_Lx+a35_Lx+a40_Lx+a45_Lx+a50_Lx+a55_Lx+a60_Lx+a65_Lx+a70_Lx+a75_Lx+a80_Lx+a85_Lx+a90_
Lx+a95_Lx+a100_Lx+a105_Lx+a110_Lx
a30_Tx =
a30_Lx+a35_Lx+a40_Lx+a45_Lx+a50_Lx+a55_Lx+a60_Lx+a65_Lx+a70_Lx+a75_Lx+a80_Lx+a85_Lx+a90_Lx+a95_
Lx+a100_Lx+a105_Lx+a110_Lx
a35_Tx =
a35_Lx+a40_Lx+a45_Lx+a50_Lx+a55_Lx+a60_Lx+a65_Lx+a70_Lx+a75_Lx+a80_Lx+a85_Lx+a90_Lx+a95_Lx+a100_
_Lx+a105_Lx+a110_Lx
a40_Tx =
a40_Lx+a45_Lx+a50_Lx+a55_Lx+a60_Lx+a65_Lx+a70_Lx+a75_Lx+a80_Lx+a85_Lx+a90_Lx+a95_Lx+a100_Lx+a10
5_Lx+a110_Lx
a45_Tx =
a45_Lx+a50_Lx+a55_Lx+a60_Lx+a65_Lx+a70_Lx+a75_Lx+a80_Lx+a85_Lx+a90_Lx+a95_Lx+a100_Lx+a105_Lx+a1
0_Lx
a50_Tx =
a50_Lx+a55_Lx+a60_Lx+a65_Lx+a70_Lx+a75_Lx+a80_Lx+a85_Lx+a90_Lx+a95_Lx+a100_Lx+a105_Lx+a110_Lx

```

```

a55_Tx =
a55_Lx+a60_Lx+a65_Lx+a70_Lx+a75_Lx+a80_Lx+a85_Lx+a90_Lx+a95_Lx+a100_Lx+a105_Lx+a110_Lx
a60_Tx = a60_Lx+a65_Lx+a70_Lx+a75_Lx+a80_Lx+a85_Lx+a90_Lx+a95_Lx+a100_Lx+a105_Lx+a110_Lx
a65_Tx = a65_Lx+a70_Lx+a75_Lx+a80_Lx+a85_Lx+a90_Lx+a95_Lx+a100_Lx+a105_Lx+a110_Lx
a70_Tx = a70_Lx+a75_Lx+a80_Lx+a85_Lx+a90_Lx+a95_Lx+a100_Lx+a105_Lx+a110_Lx
a75_Tx = a75_Lx+a80_Lx+a85_Lx+a90_Lx+a95_Lx+a100_Lx+a105_Lx+a110_Lx
a80_Tx = a80_Lx+a85_Lx+a90_Lx+a95_Lx+a100_Lx+a105_Lx+a110_Lx
a85_Tx = a85_Lx+a90_Lx+a95_Lx+a100_Lx+a105_Lx+a110_Lx
a90_Tx = a90_Lx+a95_Lx+a100_Lx+a105_Lx+a110_Lx
a95_Tx = a95_Lx+a100_Lx+a105_Lx+a110_Lx
a100_Tx = a100_Lx+a105_Lx+a110_Lx
a105_Tx = a105_Lx+a110_Lx
a110_Tx = a110_Lx

```

```
##### estimate qx: 15-64, 65-84, 85-94
```

```

a1564_qx = (a15_dx+a20_dx+a25_dx+a30_dx+a35_dx+a40_dx+a45_dx+a50_dx+a55_dx+a60_dx)/a15_lx
a6584_qx = (a65_dx+a70_dx+a75_dx+a80_dx)/a65_lx
a8594_qx = (a85_dx+a90_dx)/a85_lx

```

```
##### estimate life expectancy
```

```
#calculate ex
```

```

a0_ex = a0_Tx/radix
a1_ex = a1_Tx/a1_lx
a5_ex = a5_Tx/a5_lx
a10_ex = a10_Tx/a10_lx
a15_ex = a15_Tx/a15_lx
a20_ex = a20_Tx/a20_lx
a25_ex = a25_Tx/a25_lx
a30_ex = a30_Tx/a30_lx
a35_ex = a35_Tx/a35_lx
a40_ex = a40_Tx/a40_lx
a45_ex = a45_Tx/a45_lx
a50_ex = a50_Tx/a50_lx
a55_ex = a55_Tx/a55_lx
a60_ex = a60_Tx/a60_lx
a65_ex = a65_Tx/a65_lx
a70_ex = a70_Tx/a70_lx
a75_ex = a75_Tx/a75_lx
a80_ex = a80_Tx/a80_lx
a85_ex = a85_Tx/a85_lx
a90_ex = a90_Tx/a90_lx
a95_ex = a95_Tx/a95_lx
a100_ex = a100_Tx/a100_lx
a105_ex = a105_Tx/a105_lx
a110_ex = a110_Tx/a110_lx

```

```
# save data
```

```

tot_file_name = r"/Users/ryan/Documents/Papers/LE Trends_COVID/2021 Life
Expectancy/simulations/peer/total/esp_t_ex.txt"

```



```

tot_opened_file.write('{0} {1} {2} {3}\n'.format(count,"110",a110_sx,a110_ex))

print(count)
count += 1 # This is the same as count = count + 1
tot_opened_file.close()
print("simulation completed")

```

## Estimate Median and Credible Range from 2021 Life Expectancy Distributions, Peer Total

```

*****
***** Append all Countries *****
***** Distributions of Sim LE at birth for 19 peer countries *****
*****

* 19 Country Peer Comparison Group, 3/28/22 HMDB-STMF data
* Input Simulation Results into Stata

* Austria, Total Pop

import delimited "/Users/ryan/Documents/Papers/LE Trends_COVID/2021 Life
Expectancy/simulations/peer/total/aut_t_ex.txt", delimiter(space) varnames(1)
encoding(ISO-8859-1) clear

gen country="Austria"
keep if age == 0

save "/Users/ryan/Documents/Papers/LE Trends_COVID/2021 Life
Expectancy/simulations/peer/total/aut_t.dta", replace

* Belgium, Total Pop

import delimited "/Users/ryan/Documents/Papers/LE Trends_COVID/2021 Life
Expectancy/simulations/peer/total/bel_t_ex.txt", delimiter(space)
encoding(ISO-8859-1) clear

gen country="Belgium"
keep if age == 0

save "/Users/ryan/Documents/Papers/LE Trends_COVID/2021 Life
Expectancy/simulations/peer/total/bel_t.dta", replace

* Denmark, Total Pop

import delimited "/Users/ryan/Documents/Papers/LE Trends_COVID/2021 Life
Expectancy/simulations/peer/total/dnk_t_ex.txt", delimiter(space)
encoding(ISO-8859-1) clear

gen country="Denmark"
keep if age == 0

save "/Users/ryan/Documents/Papers/LE Trends_COVID/2021 Life
Expectancy/simulations/peer/total/dnk_t.dta", replace

```



```

* Finland, Total Pop

import delimited "/Users/ryan/Documents/Papers/LE Trends_COVID/2021 Life
Expectancy/simulations/peer/total/fin_t_ex.txt", delimiter(space)
encoding(ISO-8859-1) clear

gen country="Finland"
keep if age == 0

save "/Users/ryan/Documents/Papers/LE Trends_COVID/2021 Life
Expectancy/simulations/peer/total/fin_t.dta", replace

* Germany, Total Pop

import delimited "/Users/ryan/Documents/Papers/LE Trends_COVID/2021 Life
Expectancy/simulations/peer/total/deu_t_ex.txt", delimiter(space)
encoding(ISO-8859-1) clear

gen country="Germany"
keep if age == 0

save "/Users/ryan/Documents/Papers/LE Trends_COVID/2021 Life
Expectancy/simulations/peer/total/deu_t.dta", replace

* England, Total Pop

import delimited "/Users/ryan/Documents/Papers/LE Trends_COVID/2021 Life
Expectancy/simulations/peer/total/eng_t_ex.txt", delimiter(space)
encoding(ISO-8859-1) clear

gen country="England & Wales"
keep if age == 0

save "/Users/ryan/Documents/Papers/LE Trends_COVID/2021 Life
Expectancy/simulations/peer/total/eng_t.dta", replace

* Spain, Total Pop

import delimited "/Users/ryan/Documents/Papers/LE Trends_COVID/2021 Life
Expectancy/simulations/peer/total/esp_t_ex.txt", delimiter(space)
encoding(ISO-8859-1) clear

gen country="Spain"
keep if age == 0

save "/Users/ryan/Documents/Papers/LE Trends_COVID/2021 Life
Expectancy/simulations/peer/total/esp_t.dta", replace

* France, Total Pop

```

```
import delimited "/Users/ryan/Documents/Papers/LE Trends_COVID/2021 Life Expectancy/simulations/peer/total/fra_t_ex.txt", delimiter(space) encoding(ISO-8859-1) clear
```

```
gen country="France"  
keep if age == 0
```

```
save "/Users/ryan/Documents/Papers/LE Trends_COVID/2021 Life Expectancy/simulations/peer/total/fra_t.dta", replace
```

```
* Israel, Total Pop
```

```
import delimited "/Users/ryan/Documents/Papers/LE Trends_COVID/2021 Life Expectancy/simulations/peer/total/isr_t_ex.txt", delimiter(space) encoding(ISO-8859-1) clear
```

```
gen country="Israel"  
keep if age == 0
```

```
save "/Users/ryan/Documents/Papers/LE Trends_COVID/2021 Life Expectancy/simulations/peer/total/isr_t.dta", replace
```

```
* Italy, Total Pop
```

```
import delimited "/Users/ryan/Documents/Papers/LE Trends_COVID/2021 Life Expectancy/simulations/peer/total/ita_t_ex.txt", delimiter(space) encoding(ISO-8859-1) clear
```

```
gen country="Italy"  
keep if age == 0
```

```
save "/Users/ryan/Documents/Papers/LE Trends_COVID/2021 Life Expectancy/simulations/peer/total/ita_t.dta", replace
```

```
* Northern Ireland, Total Pop
```

```
import delimited "/Users/ryan/Documents/Papers/LE Trends_COVID/2021 Life Expectancy/simulations/peer/total/nir_t_ex.txt", delimiter(space) encoding(ISO-8859-1) clear
```

```
gen country="Northern Ireland"  
keep if age == 0
```

```
save "/Users/ryan/Documents/Papers/LE Trends_COVID/2021 Life Expectancy/simulations/peer/total/nir_t.dta", replace
```

```
* Netherlands, Total Pop
```

```
import delimited "/Users/ryan/Documents/Papers/LE Trends_COVID/2021 Life Expectancy/simulations/peer/total/nld_t_ex.txt", delimiter(space) encoding(ISO-8859-1) clear
```

```

gen country="Netherlands"
keep if age == 0

save "/Users/ryan/Documents/Papers/LE Trends_COVID/2021 Life
Expectancy/simulations/peer/total/nld_t.dta", replace

* Norway, Total Pop

import delimited "/Users/ryan/Documents/Papers/LE Trends_COVID/2021 Life
Expectancy/simulations/peer/total/nor_t_ex.txt", delimiter(space)
encoding(ISO-8859-1) clear

gen country="Norway"
keep if age == 0

save "/Users/ryan/Documents/Papers/LE Trends_COVID/2021 Life
Expectancy/simulations/peer/total/nor_t.dta", replace

* Portugal, Total Pop

import delimited "/Users/ryan/Documents/Papers/LE Trends_COVID/2021 Life
Expectancy/simulations/peer/total/por_t_ex.txt", delimiter(space)
encoding(ISO-8859-1) clear

gen country="Portugal"
keep if age == 0

save "/Users/ryan/Documents/Papers/LE Trends_COVID/2021 Life
Expectancy/simulations/peer/total/por_t.dta", replace

* Scotland, Total Pop

import delimited "/Users/ryan/Documents/Papers/LE Trends_COVID/2021 Life
Expectancy/simulations/peer/total/sco_t_ex.txt", delimiter(space)
encoding(ISO-8859-1) clear

gen country="Scotland"
keep if age == 0

save "/Users/ryan/Documents/Papers/LE Trends_COVID/2021 Life
Expectancy/simulations/peer/total/sco_t.dta", replace

* Sweden, Total Pop

import delimited "/Users/ryan/Documents/Papers/LE Trends_COVID/2021 Life
Expectancy/simulations/peer/total/swe_t_ex.txt", delimiter(space)
encoding(ISO-8859-1) clear

gen country="Sweden"
keep if age == 0

save "/Users/ryan/Documents/Papers/LE Trends_COVID/2021 Life
Expectancy/simulations/peer/total/swe_t.dta", replace

```

```

* Switzerland, Total Pop

import delimited "/Users/ryan/Documents/Papers/LE Trends_COVID/2021 Life
Expectancy/simulations/peer/total/che_t_ex.txt", delimiter(space)
encoding(ISO-8859-1) clear

gen country="Switzerland"
keep if age == 0

save "/Users/ryan/Documents/Papers/LE Trends_COVID/2021 Life
Expectancy/simulations/peer/total/che_t.dta", replace

* New Zealand, Total Pop

import delimited "/Users/ryan/Documents/Papers/LE Trends_COVID/2021 Life
Expectancy/simulations/peer/total/nzl_t_ex.txt", delimiter(space)
encoding(ISO-8859-1) clear

gen country="New Zealand"
keep if age == 0

save "/Users/ryan/Documents/Papers/LE Trends_COVID/2021 Life
Expectancy/simulations/peer/total/nzl_t.dta", replace

* South Korea, Total Pop

import delimited "/Users/ryan/Documents/Papers/LE Trends_COVID/2021 Life
Expectancy/simulations/peer/total/kor_t_ex.txt", delimiter(space)
encoding(ISO-8859-1) clear

gen country="South Korea"
keep if age == 0

save "/Users/ryan/Documents/Papers/LE Trends_COVID/2021 Life
Expectancy/simulations/peer/total/kor_t.dta", replace

*****
***** Append all Countries *****
***** Distributions of Sim LE at birth for 19 peer countries *****
*****

use "/Users/ryan/Documents/Papers/LE Trends_COVID/2021 Life
Expectancy/simulations/peer/total/aut_t.dta", clear

append using "/Users/ryan/Documents/Papers/LE Trends_COVID/2021 Life
Expectancy/simulations/peer/total/bel_t.dta"

append using "/Users/ryan/Documents/Papers/LE Trends_COVID/2021 Life
Expectancy/simulations/peer/total/dnk_t.dta"

append using "/Users/ryan/Documents/Papers/LE Trends_COVID/2021 Life
Expectancy/simulations/peer/total/fin_t.dta"

```

```

append using "/Users/ryan/Documents/Papers/LE Trends_COVID/2021 Life
Expectancy/simulations/peer/total/deu_t.dta"

append using "/Users/ryan/Documents/Papers/LE Trends_COVID/2021 Life
Expectancy/simulations/peer/total/eng_t.dta"

append using "/Users/ryan/Documents/Papers/LE Trends_COVID/2021 Life
Expectancy/simulations/peer/total/esp_t.dta"

append using "/Users/ryan/Documents/Papers/LE Trends_COVID/2021 Life
Expectancy/simulations/peer/total/fra_t.dta"

append using "/Users/ryan/Documents/Papers/LE Trends_COVID/2021 Life
Expectancy/simulations/peer/total/isr_t.dta"

append using "/Users/ryan/Documents/Papers/LE Trends_COVID/2021 Life
Expectancy/simulations/peer/total/nir_t.dta"

append using "/Users/ryan/Documents/Papers/LE Trends_COVID/2021 Life
Expectancy/simulations/peer/total/nld_t.dta"

append using "/Users/ryan/Documents/Papers/LE Trends_COVID/2021 Life
Expectancy/simulations/peer/total/nor_t.dta"

append using "/Users/ryan/Documents/Papers/LE Trends_COVID/2021 Life
Expectancy/simulations/peer/total/por_t.dta"

append using "/Users/ryan/Documents/Papers/LE Trends_COVID/2021 Life
Expectancy/simulations/peer/total/sco_t.dta"

append using "/Users/ryan/Documents/Papers/LE Trends_COVID/2021 Life
Expectancy/simulations/peer/total/swe_t.dta"

append using "/Users/ryan/Documents/Papers/LE Trends_COVID/2021 Life
Expectancy/simulations/peer/total/che_t.dta"

append using "/Users/ryan/Documents/Papers/LE Trends_COVID/2021 Life
Expectancy/simulations/peer/total/nzl_t.dta"

append using "/Users/ryan/Documents/Papers/LE Trends_COVID/2021 Life
Expectancy/simulations/peer/total/kor_t.dta"

append using "/Users/ryan/Documents/Papers/LE Trends_COVID/2021 Life
Expectancy/simulations/peer/total/ita_t.dta"

save "/Users/ryan/Documents/Papers/LE Trends_COVID/2021 Life
Expectancy/simulations/peer/total_2021ex_sim.dta", replace

tabstat ex if age == 0, statistics( p50 p5 p95 ) by(country)

```
